# Supplementary material for: Physiological and transcriptomic analyses reveal the effects of phytohormones on growth and astaxanthin accumulation in Haematococcus pluvialis
Source: Research Square preprint supplement (doi:10.21203/rs.3.rs-8198834/v1), 2025-12-15
Supplement: Supplementary file 1 [file b18672dd0c63b5338021d300.xlsx]

## Sheet: Sheet1
gene_id	UniProt Entry Name	log2FoldChange	pvalue	Gene Symbol	gene_description
gene_QJQ45_017004	ZIP9_ORYSJ	3.54434	2e-65	ZIP9	hypothetical protein && sp|Q0DHE3|ZIP9_ORYSJ Zinc transporter 9 OS=Oryza sativa subsp. japonica OX=39947 GN=ZIP9 PE=3 SV=3 && PF02535:ZIP Zinc transporter
gene_QJQ45_006121	PCKA2_ARATH	1.73223	9.55e-45	PCK2	hypothetical protein && sp|B5X574|PCKA2_ARATH Phosphoenolpyruvate carboxykinase (ATP) 2 OS=Arabidopsis thaliana OX=3702 GN=PCK2 PE=1 SV=1 && PF01293:Phosphoenolpyruvate carboxykinase
gene_QJQ45_011020	YHFO_BACSU	3.56577	3.48e-30	yhfO	hypothetical protein && sp|O07614|YHFO_BACSU Uncharacterized N-acetyltransferase YhfO OS=Bacillus subtilis (strain 168) OX=224308 GN=yhfO PE=3 SV=1 && PF13508:Acetyltransferase (GNAT) domain
gene_QJQ45_000748	FAD3C_HELAN	-1.45641	8.68e-29	FAD7	hypothetical protein && sp|Q56VS4|FAD3C_HELAN sn-2 acyl-lipid omega-3 desaturase (ferredoxin), chloroplastic OS=Helianthus annuus OX=4232 GN=FAD7 PE=1 SV=1 && PF00487:Fatty acid desaturase|PF11960:Domain of unknown function (DUF3474)
novel.2670	PPDK1_ORYSJ	1.57164	1.7e-26	PPDK1	- && sp|Q6AVA8|PPDK1_ORYSJ Pyruvate, phosphate dikinase 1, chloroplastic OS=Oryza sativa subsp. japonica OX=39947 GN=PPDK1 PE=1 SV=1 && PF02896:PEP-utilising enzyme, PEP-binding domain|PF00391:PEP-utilising enzyme, mobile domain
gene_QJQ45_015043	FABD_HUMAN	1.31165	6.74e-26	MCAT	hypothetical protein && sp|Q8IVS2|FABD_HUMAN Malonyl-CoA-acyl carrier protein transacylase, mitochondrial OS=Homo sapiens OX=9606 GN=MCAT PE=1 SV=2 && PF00698:Acyl transferase domain
gene_QJQ45_017696	MASY_EMENI	1.22884	9.01e-26	acuE	hypothetical protein && sp|P28344|MASY_EMENI Malate synthase, glyoxysomal OS=Emericella nidulans (strain FGSC A4 / ATCC 38163 / CBS 112.46 / NRRL 194 / M139) OX=227321 GN=acuE PE=3 SV=3 && PF20659:Malate synthase, C-terminal|PF01274:Malate synthase, TIM barrel domain
gene_QJQ45_016420	CLPX3_ARATH	1.19399	1.7e-24	#N/A	hypothetical protein && sp|Q66GN9|CLPX3_ARATH CLP protease regulatory subunit CLPX3, mitochondrial OS=Arabidopsis thaliana OX=3702 GN=CLPX3 PE=2 SV=1 && PF07724:AAA domain (Cdc48 subfamily)
gene_QJQ45_012422	DNAJ_SYMTH	1.42501	1.05e-23	#N/A	hypothetical protein && sp|Q67S53|DNAJ_SYMTH Chaperone protein DnaJ OS=Symbiobacterium thermophilum (strain T / IAM 14863) OX=292459 GN=dnaJ PE=3 SV=1 && PF00226:DnaJ domain
gene_QJQ45_024701	TLC1_ARATH	-1.62499	3.76e-23	AATP1	hypothetical protein && sp|Q39002|TLC1_ARATH ADP,ATP carrier protein 1, chloroplastic OS=Arabidopsis thaliana OX=3702 GN=AATP1 PE=1 SV=2 && PF03219:TLC ATP/ADP transporter
novel.8652	PPDK1_ARATH	1.48797	6.3e-23	PPDK	- && sp|O23404|PPDK1_ARATH Pyruvate, phosphate dikinase 1, chloroplastic OS=Arabidopsis thaliana OX=3702 GN=PPDK PE=1 SV=2 && PF01326:Pyruvate phosphate dikinase, AMP/ATP-binding domain
gene_QJQ45_009805	CBR_DUNSA	-1.75455	2.57e-22	CBR	hypothetical protein && sp|P27516|CBR_DUNSA Carotene biosynthesis-related protein CBR, chloroplastic OS=Dunaliella salina OX=3046 GN=CBR PE=1 SV=1 && -
novel.4570	XYN6_PYRGI	1.08949	1.93e-20	#N/A	- && sp|Q8NJ73|XYN6_PYRGI Endo-1,4-beta-xylanase 6 OS=Pyricularia grisea OX=148305 GN=XYL6 PE=1 SV=1 && PF00331:Glycosyl hydrolase family 10
gene_QJQ45_025384	MASY_EMENI	1.2227	3.34e-20	acuE	hypothetical protein && sp|P28344|MASY_EMENI Malate synthase, glyoxysomal OS=Emericella nidulans (strain FGSC A4 / ATCC 38163 / CBS 112.46 / NRRL 194 / M139) OX=227321 GN=acuE PE=3 SV=3 && PF01274:Malate synthase, TIM barrel domain|PF20659:Malate synthase, C-terminal
gene_QJQ45_020772	ZIP9_ORYSJ	1.43186	1.53e-19	ZIP9	hypothetical protein && sp|Q0DHE3|ZIP9_ORYSJ Zinc transporter 9 OS=Oryza sativa subsp. japonica OX=39947 GN=ZIP9 PE=3 SV=3 && PF02535:ZIP Zinc transporter
gene_QJQ45_026189	BLH11_ARATH	1.09561	3.2e-19	BLH11	hypothetical protein && sp|Q1PFD1|BLH11_ARATH BEL1-like homeodomain protein 11 OS=Arabidopsis thaliana OX=3702 GN=BLH11 PE=2 SV=1 && PF00331:Glycosyl hydrolase family 10|PF05920:Homeobox KN domain
novel.2085	MYLK_HUMAN	1.34903	2.02e-18	MYLK	- && sp|Q15746|MYLK_HUMAN Myosin light chain kinase, smooth muscle OS=Homo sapiens OX=9606 GN=MYLK PE=1 SV=4 && PF00069:Protein kinase domain
gene_QJQ45_001332	PCKA2_ARATH	1.32076	2.65e-18	PCK2	hypothetical protein && sp|B5X574|PCKA2_ARATH Phosphoenolpyruvate carboxykinase (ATP) 2 OS=Arabidopsis thaliana OX=3702 GN=PCK2 PE=1 SV=1 && PF01293:Phosphoenolpyruvate carboxykinase
gene_QJQ45_026522	ILVX_MYCTU	1.24741	8.02e-18	ilvX	hypothetical protein && sp|O53554|ILVX_MYCTU Putative acetolactate synthase large subunit IlvX OS=Mycobacterium tuberculosis (strain ATCC 25618 / H37Rv) OX=83332 GN=ilvX PE=1 SV=1 && PF02776:Thiamine pyrophosphate enzyme, N-terminal TPP binding domain|PF02775:Thiamine pyrophosphate enzyme, C-terminal TPP binding domain
gene_QJQ45_014322	UVR8_ARATH	-1.33454	1.81e-17	UVR8	hypothetical protein && sp|Q9FN03|UVR8_ARATH Ultraviolet-B receptor UVR8 OS=Arabidopsis thaliana OX=3702 GN=UVR8 PE=1 SV=1 && PF13540:Regulator of chromosome condensation (RCC1) repeat|PF00415:Regulator of chromosome condensation (RCC1) repeat
gene_QJQ45_014923	ACAC_DICDI	1.06226	1.88e-17	accA	hypothetical protein && sp|Q54J08|ACAC_DICDI Acetyl-CoA carboxylase OS=Dictyostelium discoideum OX=44689 GN=accA PE=3 SV=1 && PF01039:Carboxyl transferase domain
gene_QJQ45_025736	MASY_NEUCR	1.16996	2.77e-17	acu-9	hypothetical protein && sp|P28345|MASY_NEUCR Malate synthase, glyoxysomal OS=Neurospora crassa (strain ATCC 24698 / 74-OR23-1A / CBS 708.71 / DSM 1257 / FGSC 987) OX=367110 GN=acu-9 PE=3 SV=2 && PF01274:Malate synthase, TIM barrel domain
novel.2399	PPDK1_ORYSJ	1.48731	3.6e-16	PPDK1	- && sp|Q6AVA8|PPDK1_ORYSJ Pyruvate, phosphate dikinase 1, chloroplastic OS=Oryza sativa subsp. japonica OX=39947 GN=PPDK1 PE=1 SV=1 && PF00391:PEP-utilising enzyme, mobile domain|PF02896:PEP-utilising enzyme, PEP-binding domain|PF01326:Pyruvate phosphate dikinase, AMP/ATP-binding domain
gene_QJQ45_018940	ACOX3_ARATH	1.22413	6.19e-16	ACX3	hypothetical protein && sp|P0CZ23|ACOX3_ARATH Acyl-coenzyme A oxidase 3, peroxisomal OS=Arabidopsis thaliana OX=3702 GN=ACX3 PE=1 SV=1 && PF00441:Acyl-CoA dehydrogenase, C-terminal domain
gene_QJQ45_011951	YD1K_SCHPO	-2.21834	6.81e-16	#N/A	hypothetical protein && sp|Q10248|YD1K_SCHPO Uncharacterized mitochondrial carrier C4G9.20c OS=Schizosaccharomyces pombe (strain 972 / ATCC 24843) OX=284812 GN=SPAC4G9.20c PE=3 SV=2 && PF00153:Mitochondrial carrier protein
gene_QJQ45_026739	AB4A_ARATH	1.36262	1.42e-15	ABCA4	hypothetical protein && sp|Q9STT8|AB4A_ARATH ABC transporter A family member 4 OS=Arabidopsis thaliana OX=3702 GN=ABCA4 PE=3 SV=2 && -
gene_QJQ45_015318	TLC1_ARATH	-1.82625	1.54e-15	AATP1	hypothetical protein && sp|Q39002|TLC1_ARATH ADP,ATP carrier protein 1, chloroplastic OS=Arabidopsis thaliana OX=3702 GN=AATP1 PE=1 SV=2 && PF03219:TLC ATP/ADP transporter
novel.7249	PMP3_DEBHA	1.25067	6.23e-15	#N/A	- && sp|Q6BVN0|PMP3_DEBHA Plasma membrane proteolipid 3 OS=Debaryomyces hansenii (strain ATCC 36239 / CBS 767 / BCRC 21394 / JCM 1990 / NBRC 0083 / IGC 2968) OX=284592 GN=PMP3 PE=3 SV=1 && PF01679:Proteolipid membrane potential modulator
gene_QJQ45_018263	HNRH1_RAT	-1.34245	6.24e-15	Hnrnph1	hypothetical protein && sp|Q8VHV7|HNRH1_RAT Heterogeneous nuclear ribonucleoprotein H OS=Rattus norvegicus OX=10116 GN=Hnrnph1 PE=1 SV=2 && -
gene_QJQ45_021793	NRT21_CHLRE	-1.25239	6.95e-15	NRT2.1	hypothetical protein && sp|Q39608|NRT21_CHLRE Nitrate transporter 2.1 OS=Chlamydomonas reinhardtii OX=3055 GN=NRT2.1 PE=2 SV=1 && PF07690:Major Facilitator Superfamily
gene_QJQ45_024300	Y3787_MYCA9	1.03148	9.24e-15	MAB_3787	hypothetical protein && sp|B1MGB7|Y3787_MYCA9 Putative S-adenosyl-L-methionine-dependent methyltransferase MAB_3787 OS=Mycobacteroides abscessus (strain ATCC 19977 / DSM 44196 / CIP 104536 / JCM 13569 / NCTC 13031 / TMC 1543) OX=561007 GN=MAB_3787 PE=3 SV=1 && PF04072:Leucine carboxyl methyltransferase
gene_QJQ45_006554	YI31B_YEAST	1.08965	9.59e-15	TY3B-I	hypothetical protein && sp|Q7LHG5|YI31B_YEAST Transposon Ty3-I Gag-Pol polyprotein OS=Saccharomyces cerevisiae (strain ATCC 204508 / S288c) OX=559292 GN=TY3B-I PE=1 SV=2 && PF17919:RNase H-like domain found in reverse transcriptase|PF19259:Ty3 transposon capsid-like protein|PF00078:Reverse transcriptase (RNA-dependent DNA polymerase)|PF07724:AAA domain (Cdc48 subfamily)|PF17921:Integrase zinc bin…
gene_QJQ45_017730	NSUN2_CHICK	1.43701	1.1e-14	NSUN2	hypothetical protein && sp|Q5ZLV4|NSUN2_CHICK RNA cytosine-C(5)-methyltransferase NSUN2 OS=Gallus gallus OX=9031 GN=NSUN2 PE=2 SV=1 && PF01189:16S rRNA methyltransferase RsmB/F
gene_QJQ45_011018	AB5A_ARATH	1.44104	1.71e-14	ABCA5	hypothetical protein && sp|Q9STT7|AB5A_ARATH ABC transporter A family member 5 OS=Arabidopsis thaliana OX=3702 GN=ABCA5 PE=3 SV=2 && PF00005:ABC transporter
gene_QJQ45_012379	FTSH2_ORYSJ	1.27216	2.1e-14	FTSH2	hypothetical protein && sp|Q655S1|FTSH2_ORYSJ ATP-dependent zinc metalloprotease FTSH 2, chloroplastic OS=Oryza sativa subsp. japonica OX=39947 GN=FTSH2 PE=3 SV=1 && PF01434:Peptidase family M41|PF00004:ATPase family associated with various cellular activities (AAA)|PF17862:AAA+ lid domain
gene_QJQ45_019048	KAPCA_BOVIN	1.34546	3.38e-14	PRKACA	hypothetical protein && sp|P00517|KAPCA_BOVIN cAMP-dependent protein kinase catalytic subunit alpha OS=Bos taurus OX=9913 GN=PRKACA PE=1 SV=3 && PF00069:Protein kinase domain
gene_QJQ45_011593	YD1K_SCHPO	-2.27143	4.02e-14	#N/A	hypothetical protein && sp|Q10248|YD1K_SCHPO Uncharacterized mitochondrial carrier C4G9.20c OS=Schizosaccharomyces pombe (strain 972 / ATCC 24843) OX=284812 GN=SPAC4G9.20c PE=3 SV=2 && PF00153:Mitochondrial carrier protein
gene_QJQ45_017726	PDXK_ARATH	1.10671	4.81e-14	PK	hypothetical protein && sp|Q8W1X2|PDXK_ARATH Pyridoxal kinase OS=Arabidopsis thaliana OX=3702 GN=PK PE=1 SV=2 && PF08543:Phosphomethylpyrimidine kinase
gene_QJQ45_009088	HS16A_WHEAT	1.45842	4.91e-14	hsp16.9A	hypothetical protein && sp|P12810|HS16A_WHEAT 16.9 kDa class I heat shock protein 1 OS=Triticum aestivum OX=4565 GN=hsp16.9A PE=2 SV=1 && PF00011:Hsp20/alpha crystallin family
gene_QJQ45_026642	ACOX2_ARATH	1.17273	9.42e-14	ACX2	hypothetical protein && sp|O65201|ACOX2_ARATH Acyl-coenzyme A oxidase 2, peroxisomal OS=Arabidopsis thaliana OX=3702 GN=ACX2 PE=1 SV=2 && PF01756:Acyl-CoA oxidase
gene_QJQ45_030008	CBWD1_MOUSE	1.07942	1.07e-13	#N/A	hypothetical protein && sp|Q8VEH6|CBWD1_MOUSE COBW domain-containing protein 1 OS=Mus musculus OX=10090 GN=Cbwd1 PE=1 SV=1 && PF02492:CobW/HypB/UreG, nucleotide-binding domain|PF07683:Cobalamin synthesis protein cobW C-terminal domain
gene_QJQ45_016227	AQP4_MOUSE	1.31217	1.12e-13	Aqp4	hypothetical protein && sp|P55088|AQP4_MOUSE Aquaporin-4 OS=Mus musculus OX=10090 GN=Aqp4 PE=1 SV=2 && PF00230:Major intrinsic protein
gene_QJQ45_001552	YD1K_SCHPO	-2.40015	1.35e-13	#N/A	hypothetical protein && sp|Q10248|YD1K_SCHPO Uncharacterized mitochondrial carrier C4G9.20c OS=Schizosaccharomyces pombe (strain 972 / ATCC 24843) OX=284812 GN=SPAC4G9.20c PE=3 SV=2 && PF00153:Mitochondrial carrier protein
gene_QJQ45_007597	C97B3_ARATH	1.04812	1.48e-13	CYP97B3	hypothetical protein && sp|O23365|C97B3_ARATH Cytochrome P450 97B3, chloroplastic OS=Arabidopsis thaliana OX=3702 GN=CYP97B3 PE=1 SV=2 && PF00067:Cytochrome P450
gene_QJQ45_006649	NRT21_CHLRE	-1.55268	4.56e-13	NRT2.1	hypothetical protein && sp|Q39608|NRT21_CHLRE Nitrate transporter 2.1 OS=Chlamydomonas reinhardtii OX=3055 GN=NRT2.1 PE=2 SV=1 && PF07690:Major Facilitator Superfamily
gene_QJQ45_030332	THIK2_ARATH	1.06613	8.75e-13	PED1	hypothetical protein && sp|Q56WD9|THIK2_ARATH 3-ketoacyl-CoA thiolase 2, peroxisomal OS=Arabidopsis thaliana OX=3702 GN=PED1 PE=1 SV=2 && PF00108:Thiolase, N-terminal domain|PF08627:CRT-like, chloroquine-resistance transporter-like|PF02803:Thiolase, C-terminal domain
gene_QJQ45_022979	FAD3D_ARATH	-1.69282	1.39e-12	FAD8	hypothetical protein && sp|P48622|FAD3D_ARATH Temperature-sensitive sn-2 acyl-lipid omega-3 desaturase (ferredoxin), chloroplastic OS=Arabidopsis thaliana OX=3702 GN=FAD8 PE=1 SV=1 && PF00487:Fatty acid desaturase
gene_QJQ45_027161	MYB_XENLA	1.74427	1.46e-12	myb	hypothetical protein && sp|Q08759|MYB_XENLA Transcriptional activator Myb OS=Xenopus laevis OX=8355 GN=myb PE=2 SV=1 && PF00249:Myb-like DNA-binding domain
gene_QJQ45_000753	TAL_VIBCH	1.23717	2.15e-12	tal	hypothetical protein && sp|Q9KLW8|TAL_VIBCH Transaldolase OS=Vibrio cholerae serotype O1 (strain ATCC 39315 / El Tor Inaba N16961) OX=243277 GN=tal PE=3 SV=1 && PF00923:Transaldolase/Fructose-6-phosphate aldolase
gene_QJQ45_002037	H2B3_VOLCA	1.55521	4.24e-12	#N/A	hypothetical protein && sp|P16867|H2B3_VOLCA Histone H2B.3 OS=Volvox carteri OX=3067 PE=3 SV=3 && PF00125:Core histone H2A/H2B/H3/H4
gene_QJQ45_011076	UVR8_ARATH	1.08849	2.13e-11	UVR8	hypothetical protein && sp|Q9FN03|UVR8_ARATH Ultraviolet-B receptor UVR8 OS=Arabidopsis thaliana OX=3702 GN=UVR8 PE=1 SV=1 && PF00415:Regulator of chromosome condensation (RCC1) repeat
gene_QJQ45_013149	DEXH1_ARATH	1.00927	2.55e-11	At2g35920	hypothetical protein && sp|F4ILR7|DEXH1_ARATH DExH-box ATP-dependent RNA helicase DExH1 OS=Arabidopsis thaliana OX=3702 GN=At2g35920 PE=2 SV=1 && PF00271:Helicase conserved C-terminal domain
gene_QJQ45_016633	CBR_DUNSA	-1.2201	1.21e-10	CBR	hypothetical protein && sp|P27516|CBR_DUNSA Carotene biosynthesis-related protein CBR, chloroplastic OS=Dunaliella salina OX=3046 GN=CBR PE=1 SV=1 && -
novel.3776	AP23_ORYSJ	1.44634	4.3e-10	AP2-3	- && sp|Q8H443|AP23_ORYSJ APETALA2-like protein 3 OS=Oryza sativa subsp. japonica OX=39947 GN=AP2-3 PE=1 SV=1 && PF00847:AP2 domain
gene_QJQ45_022729	FAD3D_ARATH	-1.48465	1.02e-09	FAD8	hypothetical protein && sp|P48622|FAD3D_ARATH Temperature-sensitive sn-2 acyl-lipid omega-3 desaturase (ferredoxin), chloroplastic OS=Arabidopsis thaliana OX=3702 GN=FAD8 PE=1 SV=1 && PF11960:Domain of unknown function (DUF3474)|PF00487:Fatty acid desaturase
gene_QJQ45_028380	AQP8_HUMAN	1.07513	1.57e-09	AQP8	hypothetical protein && sp|O94778|AQP8_HUMAN Aquaporin-8 OS=Homo sapiens OX=9606 GN=AQP8 PE=1 SV=2 && PF00230:Major intrinsic protein
gene_QJQ45_013169	GUN24_ORYSJ	1.14359	1.59e-09	Os09g0533900	hypothetical protein && sp|Q69SG5|GUN24_ORYSJ Endoglucanase 24 OS=Oryza sativa subsp. japonica OX=39947 GN=Os09g0533900 PE=2 SV=1 && PF00759:Glycosyl hydrolase family 9
gene_QJQ45_012961	KAPCB_PIG	1.01067	4.86e-09	PRKACB	hypothetical protein && sp|P05383|KAPCB_PIG cAMP-dependent protein kinase catalytic subunit beta OS=Sus scrofa OX=9823 GN=PRKACB PE=1 SV=3 && PF00069:Protein kinase domain
gene_QJQ45_012477	FAD3C_HELAN	-1.29095	6.6e-09	FAD7	hypothetical protein && sp|Q56VS4|FAD3C_HELAN sn-2 acyl-lipid omega-3 desaturase (ferredoxin), chloroplastic OS=Helianthus annuus OX=4232 GN=FAD7 PE=1 SV=1 && PF00487:Fatty acid desaturase|PF11960:Domain of unknown function (DUF3474)
gene_QJQ45_002824	GUN4_BACS5	1.18304	1.46e-08	#N/A	hypothetical protein && sp|P28622|GUN4_BACS5 Endoglucanase 4 OS=Bacillus sp. (strain KSM-522) OX=120046 PE=3 SV=2 && PF00759:Glycosyl hydrolase family 9
gene_QJQ45_019321	UFAA1_MYCTU	-1.40148	1.76e-08	ufaA1	hypothetical protein && sp|O53732|UFAA1_MYCTU Tuberculostearic acid methyltransferase UfaA1 OS=Mycobacterium tuberculosis (strain ATCC 25618 / H37Rv) OX=83332 GN=ufaA1 PE=1 SV=3 && PF02353:Mycolic acid cyclopropane synthetase
gene_QJQ45_006646	FABD_HUMAN	1.39832	2.24e-08	MCAT	hypothetical protein && sp|Q8IVS2|FABD_HUMAN Malonyl-CoA-acyl carrier protein transacylase, mitochondrial OS=Homo sapiens OX=9606 GN=MCAT PE=1 SV=2 && -
novel.7451	SIS8_ARATH	1.05831	2.32e-08	SIS8	- && sp|Q9C9U5|SIS8_ARATH Probable serine/threonine-protein kinase SIS8 OS=Arabidopsis thaliana OX=3702 GN=SIS8 PE=1 SV=1 && PF07714:Protein tyrosine and serine/threonine kinase
gene_QJQ45_018835	BASS1_ORYSJ	-1.14742	3.67e-08	BASS1	hypothetical protein && sp|Q7XVB3|BASS1_ORYSJ Probable sodium/metabolite cotransporter BASS1, chloroplastic OS=Oryza sativa subsp. japonica OX=39947 GN=BASS1 PE=2 SV=2 && PF01758:Sodium Bile acid symporter family|PF02518:Histidine kinase-, DNA gyrase B-, and HSP90-like ATPase|PF00072:Response regulator receiver domain|PF00512:His Kinase A (phospho-acceptor) domain
novel.7316	ABCGM_DICDI	1.28459	3.98e-08	abcG22	- && sp|Q55DA0|ABCGM_DICDI ABC transporter G family member 22 OS=Dictyostelium discoideum OX=44689 GN=abcG22 PE=2 SV=1 && PF00005:ABC transporter
gene_QJQ45_026353	HNRH1_RAT	-1.19489	4.75e-08	Hnrnph1	hypothetical protein && sp|Q8VHV7|HNRH1_RAT Heterogeneous nuclear ribonucleoprotein H OS=Rattus norvegicus OX=10116 GN=Hnrnph1 PE=1 SV=2 && -
gene_QJQ45_000144	SYT2_ARATH	1.20963	6.24e-08	SYT2	hypothetical protein && sp|B6ETT4|SYT2_ARATH Synaptotagmin-2 OS=Arabidopsis thaliana OX=3702 GN=SYT2 PE=2 SV=1 && -
gene_QJQ45_014922	ACC1_ARATH	1.40939	1.62e-07	ACC1	hypothetical protein && sp|Q38970|ACC1_ARATH Acetyl-CoA carboxylase 1 OS=Arabidopsis thaliana OX=3702 GN=ACC1 PE=1 SV=1 && PF01039:Carboxyl transferase domain
novel.7606	LACS1_ARATH	1.21207	1.9e-07	LACS1	- && sp|O22898|LACS1_ARATH Long chain acyl-CoA synthetase 1 OS=Arabidopsis thaliana OX=3702 GN=LACS1 PE=2 SV=1 && -
gene_QJQ45_015241	POLR_DROME	2.8978	1.92e-07	pol	hypothetical protein && sp|P16423|POLR_DROME Retrovirus-related Pol polyprotein from type-2 retrotransposable element R2DM OS=Drosophila melanogaster OX=7227 GN=pol PE=4 SV=1 && PF03372:Endonuclease/Exonuclease/phosphatase family|PF00075:RNase H|PF00078:Reverse transcriptase (RNA-dependent DNA polymerase)
gene_QJQ45_025444	P2C60_ARATH	1.19609	3.11e-07	At4g31860	hypothetical protein && sp|Q9SZ53|P2C60_ARATH Probable protein phosphatase 2C 60 OS=Arabidopsis thaliana OX=3702 GN=At4g31860 PE=2 SV=1 && PF00481:Protein phosphatase 2C
gene_QJQ45_024703	TLC1_ARATH	-1.05884	3.11e-07	AATP1	hypothetical protein && sp|Q39002|TLC1_ARATH ADP,ATP carrier protein 1, chloroplastic OS=Arabidopsis thaliana OX=3702 GN=AATP1 PE=1 SV=2 && PF03219:TLC ATP/ADP transporter
gene_QJQ45_027777	CEL1A_XENLA	-1.10753	3.39e-07	cugbp1-a	hypothetical protein && sp|O57406|CEL1A_XENLA CUGBP Elav-like family member 1-A OS=Xenopus laevis OX=8355 GN=cugbp1-a PE=1 SV=1 && PF00076:RNA recognition motif
novel.1399	PSBS1_CHLRE	1.32883	3.63e-07	PSBS1	- && sp|A8HPM2|PSBS1_CHLRE Photosystem II protein PSBS1 OS=Chlamydomonas reinhardtii OX=3055 GN=PSBS1 PE=1 SV=1 && -
gene_QJQ45_018241	PO21_NASVI	1.0643	3.77e-07	#N/A	hypothetical protein && sp|Q03278|PO21_NASVI Retrovirus-related Pol polyprotein from type-1 retrotransposable element R2 (Fragment) OS=Nasonia vitripennis OX=7425 PE=4 SV=2 && PF00078:Reverse transcriptase (RNA-dependent DNA polymerase)
gene_QJQ45_023173	FIXL_AZOC5	-2.00934	4.08e-07	fixL	hypothetical protein && sp|P26489|FIXL_AZOC5 Sensor protein FixL OS=Azorhizobium caulinodans (strain ATCC 43989 / DSM 5975 / JCM 20966 / NBRC 14845 / NCIMB 13405 / ORS 571) OX=438753 GN=fixL PE=3 SV=1 && -
gene_QJQ45_010774	BTGC_EMENI	1.10976	4.68e-07	btgC	hypothetical protein && sp|Q5B430|BTGC_EMENI Glucan endo-1,3-beta-glucosidase btgC OS=Emericella nidulans (strain FGSC A4 / ATCC 38163 / CBS 112.46 / NRRL 194 / M139) OX=227321 GN=btgC PE=2 SV=1 && -
gene_QJQ45_014794	MECR_MOUSE	1.42283	5.95e-07	Mecr	hypothetical protein && sp|Q9DCS3|MECR_MOUSE Enoyl-[acyl-carrier-protein] reductase, mitochondrial OS=Mus musculus OX=10090 GN=Mecr PE=1 SV=2 && -
gene_QJQ45_025980	PXG_PINEL	1.09865	6.42e-07	#N/A	hypothetical protein && sp|A0A1I9R3Y5|PXG_PINEL Peroxygenase OS=Pinus elliottii OX=42064 PE=1 SV=1 && PF05042:Caleosin related protein
gene_QJQ45_019939	GUN3_ORYSJ	1.24382	7.86e-07	GLU8	hypothetical protein && sp|Q8LQ92|GUN3_ORYSJ Endoglucanase 3 OS=Oryza sativa subsp. japonica OX=39947 GN=GLU8 PE=2 SV=1 && PF13632:Glycosyl transferase family group 2|PF00759:Glycosyl hydrolase family 9
gene_QJQ45_014344	GUN11_ORYSJ	1.07987	9.46e-07	GLU4	hypothetical protein && sp|Q7XTH4|GUN11_ORYSJ Endoglucanase 11 OS=Oryza sativa subsp. japonica OX=39947 GN=GLU4 PE=2 SV=3 && PF13632:Glycosyl transferase family group 2|PF00759:Glycosyl hydrolase family 9
novel.4683	M3K12_HUMAN	1.24566	1.1e-06	MAP3K12	- && sp|Q12852|M3K12_HUMAN Mitogen-activated protein kinase kinase kinase 12 OS=Homo sapiens OX=9606 GN=MAP3K12 PE=1 SV=2 && PF07714:Protein tyrosine and serine/threonine kinase
gene_QJQ45_021745	AB9G_ARATH	1.03578	1.14e-06	ABCG9	hypothetical protein && sp|Q9SZR9|AB9G_ARATH ABC transporter G family member 9 OS=Arabidopsis thaliana OX=3702 GN=ABCG9 PE=1 SV=2 && PF01061:ABC-2 type transporter|PF00005:ABC transporter
gene_QJQ45_029271	VGFR2_MOUSE	-1.18852	1.3e-06	Kdr	hypothetical protein && sp|P35918|VGFR2_MOUSE Vascular endothelial growth factor receptor 2 OS=Mus musculus OX=10090 GN=Kdr PE=1 SV=2 && PF00069:Protein kinase domain|PF07714:Protein tyrosine and serine/threonine kinase
gene_QJQ45_010708	HNRH1_RAT	-4.41912	1.46e-06	Hnrnph1	hypothetical protein && sp|Q8VHV7|HNRH1_RAT Heterogeneous nuclear ribonucleoprotein H OS=Rattus norvegicus OX=10116 GN=Hnrnph1 PE=1 SV=2 && -
gene_QJQ45_022818	KPCD1_HUMAN	-1.0063	1.65e-06	PRKD1	hypothetical protein && sp|Q15139|KPCD1_HUMAN Serine/threonine-protein kinase D1 OS=Homo sapiens OX=9606 GN=PRKD1 PE=1 SV=2 && PF07714:Protein tyrosine and serine/threonine kinase
gene_QJQ45_022417	GUN3_ORYSJ	1.09991	1.66e-06	GLU8	hypothetical protein && sp|Q8LQ92|GUN3_ORYSJ Endoglucanase 3 OS=Oryza sativa subsp. japonica OX=39947 GN=GLU8 PE=2 SV=1 && PF13641:Glycosyltransferase like family 2|PF00759:Glycosyl hydrolase family 9
gene_QJQ45_009641	MY119_ARATH	1.10191	1.69e-06	MYB119	hypothetical protein && sp|Q9FIM4|MY119_ARATH Transcription factor MYB119 OS=Arabidopsis thaliana OX=3702 GN=MYB119 PE=2 SV=1 && PF00249:Myb-like DNA-binding domain
gene_QJQ45_026614	SYT5_ARATH	-3.13943	1.92e-06	SYT5	hypothetical protein && sp|Q8L706|SYT5_ARATH Synaptotagmin-5 OS=Arabidopsis thaliana OX=3702 GN=SYT5 PE=2 SV=1 && PF00168:C2 domain|PF17047:Synaptotagmin-like mitochondrial-lipid-binding domain
gene_QJQ45_025549	CP4F1_RAT	1.38109	2.3e-06	Cyp4f1	hypothetical protein && sp|P33274|CP4F1_RAT Cytochrome P450 4F1 OS=Rattus norvegicus OX=10116 GN=Cyp4f1 PE=1 SV=1 && PF00067:Cytochrome P450
gene_QJQ45_028658	PNP_DEIRA	1.0447	2.67e-06	pnp	hypothetical protein && sp|Q9RSR1|PNP_DEIRA Polyribonucleotide nucleotidyltransferase OS=Deinococcus radiodurans (strain ATCC 13939 / DSM 20539 / JCM 16871 / LMG 4051 / NBRC 15346 / NCIMB 9279 / R1 / VKM B-1422) OX=243230 GN=pnp PE=1 SV=2 && PF00575:S1 RNA binding domain
novel.8681	MASY_EMENI	1.4114	2.69e-06	acuE	- && sp|P28344|MASY_EMENI Malate synthase, glyoxysomal OS=Emericella nidulans (strain FGSC A4 / ATCC 38163 / CBS 112.46 / NRRL 194 / M139) OX=227321 GN=acuE PE=3 SV=3 && PF01274:Malate synthase, TIM barrel domain
gene_QJQ45_021746	SODM_CHLRE	1.06398	2.7e-06	SODA	hypothetical protein && sp|Q42684|SODM_CHLRE Superoxide dismutase [Mn], mitochondrial OS=Chlamydomonas reinhardtii OX=3055 GN=SODA PE=2 SV=1 && PF02777:Iron/manganese superoxide dismutases, C-terminal domain
gene_QJQ45_024699	CH10_THENE	-2.61189	3.7e-06	groES	hypothetical protein && sp|Q9EZV2|CH10_THENE 10 kDa chaperonin OS=Thermotoga neapolitana OX=2337 GN=groS PE=3 SV=1 && PF00166:Chaperonin 10 Kd subunit|PF18599:Limiting CO2-inducible proteins B/C beta carbonyic anhydrases
gene_QJQ45_029239	DHKB_DICDI	-1.03441	3.75e-06	dhkB	hypothetical protein && sp|Q54YH4|DHKB_DICDI Hybrid signal transduction histidine kinase B OS=Dictyostelium discoideum OX=44689 GN=dhkB PE=1 SV=1 && PF00072:Response regulator receiver domain|PF00512:His Kinase A (phospho-acceptor) domain|PF02518:Histidine kinase-, DNA gyrase B-, and HSP90-like ATPase
gene_QJQ45_018034	AB8A_ARATH	1.38321	3.92e-06	ABCA8	hypothetical protein && sp|Q8LPK0|AB8A_ARATH ABC transporter A family member 8 OS=Arabidopsis thaliana OX=3702 GN=ABCA8 PE=2 SV=3 && -
novel.5084	INT1_ARATH	1.05673	4.94e-06	INT1	- && sp|Q8VZR6|INT1_ARATH Inositol transporter 1 OS=Arabidopsis thaliana OX=3702 GN=INT1 PE=1 SV=1 && PF00083:Sugar (and other) transporter
gene_QJQ45_001702	IF5A1_ARATH	-2.40168	5.05e-06	ELF5A-1	hypothetical protein && sp|Q9XI91|IF5A1_ARATH Eukaryotic translation initiation factor 5A-1 OS=Arabidopsis thaliana OX=3702 GN=ELF5A-1 PE=1 SV=1 && PF21485:Translation initiation factor 5A-like, N-terminal|PF01287:Eukaryotic elongation factor 5A hypusine, DNA-binding OB fold
gene_QJQ45_029425	ACOX3_ARATH	1.59744	5.45e-06	ACX3	hypothetical protein && sp|P0CZ23|ACOX3_ARATH Acyl-coenzyme A oxidase 3, peroxisomal OS=Arabidopsis thaliana OX=3702 GN=ACX3 PE=1 SV=1 && PF01756:Acyl-CoA oxidase
gene_QJQ45_027204	VANA_PSEUH	1.29611	5.7e-06	vanA	hypothetical protein && sp|O05616|VANA_PSEUH Vanillate O-demethylase oxygenase subunit OS=Pseudomonas sp. (strain HR199 / DSM 7063) OX=86003 GN=vanA PE=3 SV=1 && PF00355:Rieske [2Fe-2S] domain|PF19112:Vanillate O-demethylase oxygenase C-terminal domain
novel.1401	MAN5_ORYSJ	1.32968	7.42e-06	MAN5	- && sp|Q5W6G0|MAN5_ORYSJ Putative mannan endo-1,4-beta-mannosidase 5 OS=Oryza sativa subsp. japonica OX=39947 GN=MAN5 PE=2 SV=2 && -
gene_QJQ45_015778	CAH_PECCA	-1.42961	8.28e-06	cah	hypothetical protein && sp|O52538|CAH_PECCA Carbonic anhydrase OS=Pectobacterium carotovorum OX=554 GN=cah PE=3 SV=1 && PF00194:Eukaryotic-type carbonic anhydrase
gene_QJQ45_020618	U80A2_ARATH	1.14127	8.3e-06	UGT80A2	hypothetical protein && sp|Q9M8Z7|U80A2_ARATH Sterol 3-beta-glucosyltransferase UGT80A2 OS=Arabidopsis thaliana OX=3702 GN=UGT80A2 PE=1 SV=1 && PF03033:Glycosyltransferase family 28 N-terminal domain|PF06722:Erythromycin biosynthesis protein CIII-like, C-terminal domain
gene_QJQ45_017844	YG31B_YEAST	2.49133	8.86e-06	TY3B-G	hypothetical protein && sp|Q99315|YG31B_YEAST Transposon Ty3-G Gag-Pol polyprotein OS=Saccharomyces cerevisiae (strain ATCC 204508 / S288c) OX=559292 GN=TY3B-G PE=1 SV=3 && PF00665:Integrase core domain|PF00385:Chromo (CHRromatin Organisation MOdifier) domain|PF17917:RNase H-like domain found in reverse transcriptase|PF17921:Integrase zinc binding domain|PF00078:Reverse transcriptase (RNA-depende…
gene_QJQ45_018314	MY119_ARATH	1.19977	9.55e-06	MYB119	hypothetical protein && sp|Q9FIM4|MY119_ARATH Transcription factor MYB119 OS=Arabidopsis thaliana OX=3702 GN=MYB119 PE=2 SV=1 && PF13921:Myb-like DNA-binding domain
gene_QJQ45_004396	ACOX2_ARATH	1.99531	1.09e-05	ACX2	hypothetical protein && sp|O65201|ACOX2_ARATH Acyl-coenzyme A oxidase 2, peroxisomal OS=Arabidopsis thaliana OX=3702 GN=ACX2 PE=1 SV=2 && PF00441:Acyl-CoA dehydrogenase, C-terminal domain|PF02770:Acyl-CoA dehydrogenase, middle domain|PF01756:Acyl-CoA oxidase
novel.7178	IPL1_CANGA	1.6787	1.2e-05	#N/A	- && sp|Q6FV07|IPL1_CANGA Spindle assembly checkpoint kinase OS=Candida glabrata (strain ATCC 2001 / BCRC 20586 / JCM 3761 / NBRC 0622 / NRRL Y-65 / CBS 138) OX=284593 GN=IPL1 PE=3 SV=1 && PF00069:Protein kinase domain
gene_QJQ45_004684	NIPA4_ARATH	-1.33321	1.35e-05	At1g71900	hypothetical protein && sp|Q94AH3|NIPA4_ARATH Probable magnesium transporter NIPA4 OS=Arabidopsis thaliana OX=3702 GN=At1g71900 PE=2 SV=1 && PF05653:Magnesium transporter NIPA
gene_QJQ45_022981	Y2452_ARATH	2.16751	1.38e-05	CBSDUF3	hypothetical protein && sp|Q9ZQR4|Y2452_ARATH DUF21 domain-containing protein At2g14520 OS=Arabidopsis thaliana OX=3702 GN=CBSDUF3 PE=2 SV=2 && PF01595:Cyclin M transmembrane N-terminal domain
gene_QJQ45_017445	PXG_PINEL	1.04456	1.47e-05	#N/A	hypothetical protein && sp|A0A1I9R3Y5|PXG_PINEL Peroxygenase OS=Pinus elliottii OX=42064 PE=1 SV=1 && PF05042:Caleosin related protein
gene_QJQ45_014946	DYH6_HUMAN	-2.31893	1.75e-05	DNAH6	hypothetical protein && sp|Q9C0G6|DYH6_HUMAN Dynein axonemal heavy chain 6 OS=Homo sapiens OX=9606 GN=DNAH6 PE=2 SV=3 && PF17857:AAA+ lid domain|PF12777:Microtubule-binding stalk of dynein motor|PF03028:Dynein heavy chain region D6 P-loop domain|PF18198:Dynein heavy chain AAA lid domain|PF12775:P-loop containing dynein motor region|PF18199:Dynein heavy chain C-terminal domain|PF12781:ATP-binding …
novel.1636	MAN5_ORYSJ	1.81041	1.87e-05	MAN5	- && sp|Q5W6G0|MAN5_ORYSJ Putative mannan endo-1,4-beta-mannosidase 5 OS=Oryza sativa subsp. japonica OX=39947 GN=MAN5 PE=2 SV=2 && -
gene_QJQ45_014831	PXG1_AVESA	1.08074	1.88e-05	#N/A	hypothetical protein && sp|G1JSL4|PXG1_AVESA Peroxygenase 1 OS=Avena sativa OX=4498 PE=1 SV=1 && PF05042:Caleosin related protein
novel.174	POLR_DROME	1.48235	2.62e-05	pol	- && sp|P16423|POLR_DROME Retrovirus-related Pol polyprotein from type-2 retrotransposable element R2DM OS=Drosophila melanogaster OX=7227 GN=pol PE=4 SV=1 && PF03372:Endonuclease/Exonuclease/phosphatase family
gene_QJQ45_022418	RENT1_NEUCR	1.08584	2.66e-05	2E4.130	hypothetical protein && sp|Q9HEH1|RENT1_NEUCR Regulator of nonsense transcripts 1 homolog OS=Neurospora crassa (strain ATCC 24698 / 74-OR23-1A / CBS 708.71 / DSM 1257 / FGSC 987) OX=367110 GN=2E4.130 PE=3 SV=1 && PF13086:AAA domain|PF13087:AAA domain
gene_QJQ45_024029	MOG_ECO57	-4.54008	2.76e-05	mog	hypothetical protein && sp|P0AF04|MOG_ECO57 Molybdopterin adenylyltransferase OS=Escherichia coli O157:H7 OX=83334 GN=mog PE=3 SV=1 && -
gene_QJQ45_009984	M3K12_HUMAN	1.00602	2.82e-05	MAP3K12	hypothetical protein && sp|Q12852|M3K12_HUMAN Mitogen-activated protein kinase kinase kinase 12 OS=Homo sapiens OX=9606 GN=MAP3K12 PE=1 SV=2 && PF07714:Protein tyrosine and serine/threonine kinase
gene_QJQ45_021070	KCNH2_RABIT	-1.08864	3.57e-05	KCNH2	hypothetical protein && sp|Q8WNY2|KCNH2_RABIT Potassium voltage-gated channel subfamily H member 2 OS=Oryctolagus cuniculus OX=9986 GN=KCNH2 PE=2 SV=3 && PF00520:Ion transport protein
gene_QJQ45_015852	POSTN_HUMAN	-1.32087	4.45e-05	POSTN	hypothetical protein && sp|Q15063|POSTN_HUMAN Periostin OS=Homo sapiens OX=9606 GN=POSTN PE=1 SV=2 && PF02469:Fasciclin domain
gene_QJQ45_013034	ACOX2_CUCMA	1.44623	4.59e-05	Acx	hypothetical protein && sp|O64894|ACOX2_CUCMA Acyl-coenzyme A oxidase, peroxisomal OS=Cucurbita maxima OX=3661 GN=Acx PE=1 SV=1 && -
gene_QJQ45_021674	AT8A1_MOUSE	-1.48072	6.35e-05	Atp8a1	hypothetical protein && sp|P70704|AT8A1_MOUSE Phospholipid-transporting ATPase IA OS=Mus musculus OX=10090 GN=Atp8a1 PE=1 SV=2 && PF13246:Cation transport ATPase (P-type)
gene_QJQ45_023916	KAPCA_CRIGR	1.02848	7.37e-05	PRKACA	hypothetical protein && sp|P25321|KAPCA_CRIGR cAMP-dependent protein kinase catalytic subunit alpha OS=Cricetulus griseus OX=10029 GN=PRKACA PE=1 SV=2 && PF00069:Protein kinase domain
gene_QJQ45_016040	ANM7_DROAN	1.0811	0.00012285	Art7	hypothetical protein && sp|B3MF31|ANM7_DROAN Protein arginine N-methyltransferase 7 OS=Drosophila ananassae OX=7217 GN=Art7 PE=3 SV=1 && -
gene_QJQ45_019980	RHVI1_ROSHC	1.00474	0.000126056	#N/A	hypothetical protein && sp|H2DF87|RHVI1_ROSHC Acid beta-fructofuranosidase 1, vacuolar OS=Rosa hybrid cultivar OX=128735 PE=1 SV=1 && PF00251:Glycosyl hydrolases family 32 N-terminal domain|PF08244:Glycosyl hydrolases family 32 C terminal
gene_QJQ45_013744	SCRK2_ORYSI	1.1251	0.000129578	FRK2	hypothetical protein && sp|A2YQL4|SCRK2_ORYSI Fructokinase-2 OS=Oryza sativa subsp. indica OX=39946 GN=FRK2 PE=1 SV=2 && PF00294:pfkB family carbohydrate kinase
gene_QJQ45_008147	U2AFA_ORYSJ	-1.51916	0.000178188	U2AF35A	hypothetical protein && sp|Q9ZQW8|U2AFA_ORYSJ Splicing factor U2af small subunit A OS=Oryza sativa subsp. japonica OX=39947 GN=U2AF35A PE=2 SV=1 && PF00078:Reverse transcriptase (RNA-dependent DNA polymerase)
gene_QJQ45_024677	BCH_HAELA	-3.28014	0.000180395	CRTZ	hypothetical protein && sp|Q9SPK6|BCH_HAELA Beta-carotene 3-hydroxylase, chloroplastic (Fragment) OS=Haematococcus lacustris OX=44745 GN=CRTZ PE=2 SV=1 && PF04116:Fatty acid hydroxylase
gene_QJQ45_015231	MYB_XENLA	1.58579	0.00020299	myb	hypothetical protein && sp|Q08759|MYB_XENLA Transcriptional activator Myb OS=Xenopus laevis OX=8355 GN=myb PE=2 SV=1 && PF00249:Myb-like DNA-binding domain
gene_QJQ45_025570	KPYC2_ORYSI	1.68521	0.000210832	OsI_37456	hypothetical protein && sp|B8BM17|KPYC2_ORYSI Pyruvate kinase 2, cytosolic OS=Oryza sativa subsp. indica OX=39946 GN=OsI_37456 PE=3 SV=1 && PF00224:Pyruvate kinase, barrel domain
gene_QJQ45_000204	Y2452_ARATH	1.57443	0.000232087	CBSDUF3	hypothetical protein && sp|Q9ZQR4|Y2452_ARATH DUF21 domain-containing protein At2g14520 OS=Arabidopsis thaliana OX=3702 GN=CBSDUF3 PE=2 SV=2 && PF01595:Cyclin M transmembrane N-terminal domain
gene_QJQ45_014397	DPOD4_BOVIN	1.04786	0.000246443	POLD4	hypothetical protein && sp|Q3T0X9|DPOD4_BOVIN DNA polymerase delta subunit 4 OS=Bos taurus OX=9913 GN=POLD4 PE=1 SV=1 && PF04081:DNA polymerase delta, subunit 4
gene_QJQ45_013957	CKB11_ORYSJ	-2.30436	0.000276681	CDKB1-1	hypothetical protein && sp|Q8L4P8|CKB11_ORYSJ Cyclin-dependent kinase B1-1 OS=Oryza sativa subsp. japonica OX=39947 GN=CDKB1-1 PE=2 SV=1 && PF00069:Protein kinase domain
gene_QJQ45_024257	EXOS5_ARATH	2.74252	0.000282137	RRP46	hypothetical protein && sp|Q9LX74|EXOS5_ARATH Exosome complex exonuclease RRP46 homolog OS=Arabidopsis thaliana OX=3702 GN=RRP46 PE=2 SV=1 && PF01138:3' exoribonuclease family, domain 1
gene_QJQ45_007350	IF5A1_ARATH	2.46871	0.000289314	ELF5A-1	hypothetical protein && sp|Q9XI91|IF5A1_ARATH Eukaryotic translation initiation factor 5A-1 OS=Arabidopsis thaliana OX=3702 GN=ELF5A-1 PE=1 SV=1 && PF21485:Translation initiation factor 5A-like, N-terminal|PF01287:Eukaryotic elongation factor 5A hypusine, DNA-binding OB fold
gene_QJQ45_023291	CKB11_ORYSJ	1.48514	0.000297519	CDKB1-1	hypothetical protein && sp|Q8L4P8|CKB11_ORYSJ Cyclin-dependent kinase B1-1 OS=Oryza sativa subsp. japonica OX=39947 GN=CDKB1-1 PE=2 SV=1 && PF00069:Protein kinase domain
gene_QJQ45_026341	CCB21_ORYSI	1.55965	0.000450617	CYCB2-1	hypothetical protein && sp|Q01J96|CCB21_ORYSI Cyclin-B2-1 OS=Oryza sativa subsp. indica OX=39946 GN=CYCB2-1 PE=1 SV=1 && PF00134:Cyclin, N-terminal domain|PF02984:Cyclin, C-terminal domain
novel.3963	ARI1_ARATH	1.00586	0.00045553	ARI1	- && sp|Q949V6|ARI1_ARATH Probable E3 ubiquitin-protein ligase ARI1 OS=Arabidopsis thaliana OX=3702 GN=ARI1 PE=2 SV=1 && PF01485:IBR domain, a half RING-finger domain
gene_QJQ45_025478	PLIP1_ARATH	-1.02663	0.000484007	PLIP1	hypothetical protein && sp|Q7Y220|PLIP1_ARATH Phospholipase A1 PLIP1, chloroplastic OS=Arabidopsis thaliana OX=3702 GN=PLIP1 PE=1 SV=1 && PF01764:Lipase (class 3)
gene_QJQ45_021413	UFAA1_MYCTU	-1.00683	0.000579309	ufaA1	hypothetical protein && sp|O53732|UFAA1_MYCTU Tuberculostearic acid methyltransferase UfaA1 OS=Mycobacterium tuberculosis (strain ATCC 25618 / H37Rv) OX=83332 GN=ufaA1 PE=1 SV=3 && PF02353:Mycolic acid cyclopropane synthetase
gene_QJQ45_024636	DAA11_BOVIN	1.36057	0.000752824	DNAAF11	hypothetical protein && sp|Q1RMR5|DAA11_BOVIN Dynein axonemal assembly factor 11 OS=Bos taurus OX=9913 GN=DNAAF11 PE=2 SV=1 && PF14580:Leucine-rich repeat
gene_QJQ45_025814	PIP_AERSO	-1.10501	0.000783685	pip	hypothetical protein && sp|P46547|PIP_AERSO Proline iminopeptidase OS=Aeromonas sobria OX=646 GN=pip PE=1 SV=3 && -
novel.1129	ANM10_ARATH	1.79922	0.000799236	PRMT10	- && sp|Q9MAT5|ANM10_ARATH Protein arginine N-methyltransferase PRMT10 OS=Arabidopsis thaliana OX=3702 GN=PRMT10 PE=1 SV=1 && -
gene_QJQ45_014030	MDV1_ASPTN	-1.08952	0.00085931	mdv1	hypothetical protein && sp|Q0CJD8|MDV1_ASPTN Mitochondrial division protein 1 OS=Aspergillus terreus (strain NIH 2624 / FGSC A1156) OX=341663 GN=mdv1 PE=3 SV=2 && -
gene_QJQ45_014726	P2C77_ARATH	1.00985	0.000917499	ABI2	hypothetical protein && sp|O04719|P2C77_ARATH Protein phosphatase 2C 77 OS=Arabidopsis thaliana OX=3702 GN=ABI2 PE=1 SV=1 && PF00481:Protein phosphatase 2C|PF02714:Calcium-dependent channel, 7TM region, putative phosphate|PF13967:Late exocytosis, associated with Golgi transport
gene_QJQ45_024089	AB1K7_ARATH	-1.04357	0.00093348	ABC1K7	hypothetical protein && sp|B9DGY1|AB1K7_ARATH Protein ACTIVITY OF BC1 COMPLEX KINASE 7, chloroplastic OS=Arabidopsis thaliana OX=3702 GN=ABC1K7 PE=1 SV=1 && PF03109:ABC1 atypical kinase-like domain|PF12352:Snare region anchored in the vesicle membrane C-terminus|PF05008:Vesicle transport v-SNARE protein N-terminus
gene_QJQ45_008891	POL3_DROME	1.32852	0.0010883	pol	hypothetical protein && sp|P04323|POL3_DROME Retrovirus-related Pol polyprotein from transposon 17.6 OS=Drosophila melanogaster OX=7227 GN=pol PE=4 SV=1 && PF00078:Reverse transcriptase (RNA-dependent DNA polymerase)|PF17917:RNase H-like domain found in reverse transcriptase|PF00628:PHD-finger|PF17921:Integrase zinc binding domain
gene_QJQ45_013031	FABG_CHLMU	1.20979	0.00112512	fabG	hypothetical protein && sp|Q9PKF7|FABG_CHLMU 3-oxoacyl-[acyl-carrier-protein] reductase FabG OS=Chlamydia muridarum (strain MoPn / Nigg) OX=243161 GN=fabG PE=3 SV=1 && PF13561:Enoyl-(Acyl carrier protein) reductase
gene_QJQ45_015309	SFAS_DUNBI	-1.99309	0.00117068	#N/A	hypothetical protein && sp|P54214|SFAS_DUNBI SF-assemblin OS=Dunaliella bioculata OX=13790 PE=1 SV=1 && PF06705:SF-assemblin/beta giardin
gene_QJQ45_027712	ANM7_AEDAE	1.04927	0.00123728	#N/A	hypothetical protein && sp|Q16NS8|ANM7_AEDAE Protein arginine N-methyltransferase 7 OS=Aedes aegypti OX=7159 GN=Art7 PE=3 SV=1 && -
gene_QJQ45_030437	LSS_BOTBR	-2.27199	0.00136272	LSS	hypothetical protein && sp|A0A144YEA5|LSS_BOTBR Squalene synthase LSS OS=Botryococcus braunii OX=38881 GN=LSS PE=1 SV=1 && PF00494:Squalene/phytoene synthase
gene_QJQ45_026753	DRKC_DICDI	1.24091	0.00148061	drkC	hypothetical protein && sp|Q54TA1|DRKC_DICDI Probable serine/threonine-protein kinase drkC OS=Dictyostelium discoideum OX=44689 GN=drkC PE=3 SV=1 && PF07714:Protein tyrosine and serine/threonine kinase
gene_QJQ45_019648	SPNS2_ARATH	1.15663	0.00163523	At5g64500	hypothetical protein && sp|Q9FLG8|SPNS2_ARATH Probable sphingolipid transporter spinster homolog 2 OS=Arabidopsis thaliana OX=3702 GN=At5g64500 PE=2 SV=1 && PF07690:Major Facilitator Superfamily
gene_QJQ45_029947	GUNG_RUMCH	1.62751	0.00167249	#N/A	hypothetical protein && sp|P37700|GUNG_RUMCH Endoglucanase G OS=Ruminiclostridium cellulolyticum (strain ATCC 35319 / DSM 5812 / JCM 6584 / H10) OX=394503 GN=celCCG PE=1 SV=2 && PF00759:Glycosyl hydrolase family 9
novel.2646	KISHA_DANRE	-1.45279	0.00173062	tmem167a	- && sp|Q5BJC2|KISHA_DANRE Protein kish-A OS=Danio rerio OX=7955 GN=tmem167a PE=3 SV=1 && -
gene_QJQ45_025500	SLP1_ARATH	-1.62739	0.00183336	SLP1	hypothetical protein && sp|Q8L774|SLP1_ARATH Shewanella-like protein phosphatase 1 OS=Arabidopsis thaliana OX=3702 GN=SLP1 PE=1 SV=1 && PF00149:Calcineurin-like phosphoesterase
gene_QJQ45_017857	DPE2_ORYSJ	-1.32072	0.00228118	DPE2	hypothetical protein && sp|Q69Q02|DPE2_ORYSJ 4-alpha-glucanotransferase DPE2 OS=Oryza sativa subsp. japonica OX=39947 GN=DPE2 PE=2 SV=1 && PF02446:4-alpha-glucanotransferase|PF01466:Skp1 family, dimerisation domain
gene_QJQ45_022238	PSBS1_CHLRE	1.27689	0.00231384	PSBS1	hypothetical protein && sp|A8HPM2|PSBS1_CHLRE Photosystem II protein PSBS1 OS=Chlamydomonas reinhardtii OX=3055 GN=PSBS1 PE=1 SV=1 && -
novel.7179	CDPK2_PLAF7	1.54244	0.00232373	CDPK2	- && sp|Q8ICR0|CDPK2_PLAF7 Calcium-dependent protein kinase 2 OS=Plasmodium falciparum (isolate 3D7) OX=36329 GN=CDPK2 PE=1 SV=4 && PF00069:Protein kinase domain
gene_QJQ45_020732	GS39_BACSU	1.03609	0.0023809	ydaD	hypothetical protein && sp|P80873|GS39_BACSU General stress protein 39 OS=Bacillus subtilis (strain 168) OX=224308 GN=ydaD PE=1 SV=3 && PF13561:Enoyl-(Acyl carrier protein) reductase|PF00106:short chain dehydrogenase
gene_QJQ45_026136	HAP2_CHLRE	-1.03039	0.00248894	HAP2	hypothetical protein && sp|A4GRC6|HAP2_CHLRE Hapless 2 OS=Chlamydomonas reinhardtii OX=3055 GN=HAP2 PE=1 SV=2 && PF10699:Male gamete fusion factor
gene_QJQ45_007189	CP18B_ARATH	-1.02952	0.00255195	CYP18-2	hypothetical protein && sp|Q9SIH1|CP18B_ARATH Peptidyl-prolyl cis-trans isomerase CYP18-2 OS=Arabidopsis thaliana OX=3702 GN=CYP18-2 PE=2 SV=1 && PF00160:Cyclophilin type peptidyl-prolyl cis-trans isomerase/CLD
gene_QJQ45_013813	TPPP3_MOUSE	1.05515	0.00262067	Tppp3	hypothetical protein && sp|Q9CRB6|TPPP3_MOUSE Tubulin polymerization-promoting protein family member 3 OS=Mus musculus OX=10090 GN=Tppp3 PE=1 SV=1 && PF05517:p25-alpha
gene_QJQ45_010220	H32_BOVIN	-1.10167	0.00262383	#N/A	hypothetical protein && sp|P84227|H32_BOVIN Histone H3.2 OS=Bos taurus OX=9913 PE=1 SV=2 && PF00125:Core histone H2A/H2B/H3/H4

## Sheet: Sheet2
gene_id	log2FoldChange	pvalue	UniProt Entry Name	Gene Symbol	gene_description
gene_QJQ45_004101	-1.50892	0	ACS_ARATH	ACS	hypothetical protein && sp|B9DGD6|ACS_ARATH Acetyl-coenzyme A synthetase, chloroplastic/glyoxysomal OS=Arabidopsis thaliana OX=3702 GN=ACS PE=1 SV=1 && PF00501:AMP-binding enzyme|PF13193:AMP-binding enzyme C-terminal domain|PF01184:GPR1/FUN34/yaaH family|PF16177:Acetyl-coenzyme A synthetase N-terminus
gene_QJQ45_025016	-2.8016	0	PSBO_CHLRE	PSBO	hypothetical protein && sp|P12853|PSBO_CHLRE Oxygen-evolving enhancer protein 1, chloroplastic OS=Chlamydomonas reinhardtii OX=3055 GN=PSBO PE=1 SV=1 && PF01716:Manganese-stabilising protein / photosystem II polypeptide
gene_QJQ45_019427	-2.45662	0	PSBP_CHLRE	PSBP	hypothetical protein && sp|P11471|PSBP_CHLRE Oxygen-evolving enhancer protein 2, chloroplastic OS=Chlamydomonas reinhardtii OX=3055 GN=PSBP PE=1 SV=1 && PF01789:PsbP
gene_QJQ45_019631	-2.33545	0	KPPR_CHLRE	PRKA	hypothetical protein && sp|P19824|KPPR_CHLRE Phosphoribulokinase, chloroplastic OS=Chlamydomonas reinhardtii OX=3055 GN=PRKA PE=1 SV=1 && PF00485:Phosphoribulokinase / Uridine kinase family
gene_QJQ45_010060	-1.72883	0	ACS_ARATH	ACS	hypothetical protein && sp|B9DGD6|ACS_ARATH Acetyl-coenzyme A synthetase, chloroplastic/glyoxysomal OS=Arabidopsis thaliana OX=3702 GN=ACS PE=1 SV=1 && PF01184:GPR1/FUN34/yaaH family|PF13193:AMP-binding enzyme C-terminal domain|PF00501:AMP-binding enzyme|PF16177:Acetyl-coenzyme A synthetase N-terminus
gene_QJQ45_028593	-3.27142	0	STAD_OLEEU	#N/A	hypothetical protein && sp|Q43593|STAD_OLEEU Stearoyl-[acyl-carrier-protein] 9-desaturase, chloroplastic OS=Olea europaea OX=4146 PE=2 SV=1 && PF03405:Fatty acid desaturase
gene_QJQ45_010140	-2.60012	0	HEM61_ARATH	CPX1	hypothetical protein && sp|Q9LR75|HEM61_ARATH Coproporphyrinogen-III oxidase 1, chloroplastic OS=Arabidopsis thaliana OX=3702 GN=CPX1 PE=2 SV=1 && PF01218:Coproporphyrinogen III oxidase|PF00069:Protein kinase domain
gene_QJQ45_025132	-2.34785	0	PGKH_VOLCA	PGK	hypothetical protein && sp|Q9SBN4|PGKH_VOLCA Phosphoglycerate kinase, chloroplastic OS=Volvox carteri OX=3067 GN=PGK PE=2 SV=1 && PF00162:Phosphoglycerate kinase
gene_QJQ45_024218	-2.45874	0	KPPR_CHLRE	PRKA	hypothetical protein && sp|P19824|KPPR_CHLRE Phosphoribulokinase, chloroplastic OS=Chlamydomonas reinhardtii OX=3055 GN=PRKA PE=1 SV=1 && PF00485:Phosphoribulokinase / Uridine kinase family
gene_QJQ45_028380	3.22399	0	AQP8_HUMAN	AQP8	hypothetical protein && sp|O94778|AQP8_HUMAN Aquaporin-8 OS=Homo sapiens OX=9606 GN=AQP8 PE=1 SV=2 && PF00230:Major intrinsic protein
gene_QJQ45_012817	-3.56761	0	CAB6_ARATH	LHCA1	hypothetical protein && sp|Q01667|CAB6_ARATH Chlorophyll a-b binding protein 6, chloroplastic OS=Arabidopsis thaliana OX=3702 GN=LHCA1 PE=1 SV=1 && PF00504:Chlorophyll A-B binding protein
novel.7961	-2.51331	0	HEM61_ARATH	CPX1	- && sp|Q9LR75|HEM61_ARATH Coproporphyrinogen-III oxidase 1, chloroplastic OS=Arabidopsis thaliana OX=3702 GN=CPX1 PE=2 SV=1 && PF01218:Coproporphyrinogen III oxidase
gene_QJQ45_007043	-2.45505	0	CSLA1_CYATE	ManS	hypothetical protein && sp|Q6UDF0|CSLA1_CYATE Glucomannan 4-beta-mannosyltransferase 1 OS=Cyamopsis tetragonoloba OX=3832 GN=ManS PE=1 SV=1 && PF13632:Glycosyl transferase family group 2
gene_QJQ45_018423	2.43388	0	POL3_DROME	pol	hypothetical protein && sp|P04323|POL3_DROME Retrovirus-related Pol polyprotein from transposon 17.6 OS=Drosophila melanogaster OX=7227 GN=pol PE=4 SV=1 && PF00385:Chromo (CHRromatin Organisation MOdifier) domain|PF00069:Protein kinase domain|PF08317:Spc7 kinetochore protein|PF00078:Reverse transcriptase (RNA-dependent DNA polymerase)|PF17917:RNase H-like domain found in reverse transcriptase|PF1…
gene_QJQ45_016270	-3.34901	0	STAD_OLEEU	#N/A	hypothetical protein && sp|Q43593|STAD_OLEEU Stearoyl-[acyl-carrier-protein] 9-desaturase, chloroplastic OS=Olea europaea OX=4146 PE=2 SV=1 && PF03405:Fatty acid desaturase|PF00069:Protein kinase domain
gene_QJQ45_002494	-1.74012	0	CSLA1_CYATE	ManS	hypothetical protein && sp|Q6UDF0|CSLA1_CYATE Glucomannan 4-beta-mannosyltransferase 1 OS=Cyamopsis tetragonoloba OX=3832 GN=ManS PE=1 SV=1 && PF13641:Glycosyltransferase like family 2
gene_QJQ45_028422	-3.30387	0	STAD_OLEEU	#N/A	hypothetical protein && sp|Q43593|STAD_OLEEU Stearoyl-[acyl-carrier-protein] 9-desaturase, chloroplastic OS=Olea europaea OX=4146 PE=2 SV=1 && PF03405:Fatty acid desaturase
gene_QJQ45_018862	-3.8019	0	CAB6_ARATH	LHCA1	hypothetical protein && sp|Q01667|CAB6_ARATH Chlorophyll a-b binding protein 6, chloroplastic OS=Arabidopsis thaliana OX=3702 GN=LHCA1 PE=1 SV=1 && PF00504:Chlorophyll A-B binding protein
gene_QJQ45_017445	2.92565	0	PXG_PINEL	#N/A	hypothetical protein && sp|A0A1I9R3Y5|PXG_PINEL Peroxygenase OS=Pinus elliottii OX=42064 PE=1 SV=1 && PF05042:Caleosin related protein
novel.7065	-4.68997	0	CA4_ARATH	LHCA4	- && sp|P27521|CA4_ARATH Chlorophyll a-b binding protein 4, chloroplastic OS=Arabidopsis thaliana OX=3702 GN=LHCA4 PE=1 SV=1 && -
gene_QJQ45_008453	-2.53176	0	ACEA_BACHD	#N/A	hypothetical protein && sp|Q9K9H0|ACEA_BACHD Isocitrate lyase OS=Bacillus halodurans (strain ATCC BAA-125 / DSM 18197 / FERM 7344 / JCM 9153 / C-125) OX=272558 GN=aceA PE=3 SV=1 && PF05995:Cysteine dioxygenase type I|PF00463:Isocitrate lyase family
gene_QJQ45_000217	-2.82121	0	ACS_ARATH	ACS	hypothetical protein && sp|B9DGD6|ACS_ARATH Acetyl-coenzyme A synthetase, chloroplastic/glyoxysomal OS=Arabidopsis thaliana OX=3702 GN=ACS PE=1 SV=1 && PF00501:AMP-binding enzyme|PF16177:Acetyl-coenzyme A synthetase N-terminus|PF13193:AMP-binding enzyme C-terminal domain
gene_QJQ45_023292	-2.3641	0	PSBQ_CHLRE	PSBQ	hypothetical protein && sp|P12852|PSBQ_CHLRE Oxygen-evolving enhancer protein 3, chloroplastic OS=Chlamydomonas reinhardtii OX=3055 GN=PSBQ PE=1 SV=1 && PF05757:Oxygen evolving enhancer protein 3 (PsbQ)
gene_QJQ45_027905	-3.64103	0	CA4_ARATH	LHCA4	hypothetical protein && sp|P27521|CA4_ARATH Chlorophyll a-b binding protein 4, chloroplastic OS=Arabidopsis thaliana OX=3702 GN=LHCA4 PE=1 SV=1 && PF00504:Chlorophyll A-B binding protein|PF10273:Pre-rRNA-processing protein TSR2
gene_QJQ45_027774	-3.72576	0	POR_CHLRE	PORA	hypothetical protein && sp|Q39617|POR_CHLRE Protochlorophyllide reductase, chloroplastic OS=Chlamydomonas reinhardtii OX=3055 GN=PORA PE=3 SV=1 && PF00106:short chain dehydrogenase
gene_QJQ45_016122	-2.29966	0	CSLA1_CYATE	ManS	hypothetical protein && sp|Q6UDF0|CSLA1_CYATE Glucomannan 4-beta-mannosyltransferase 1 OS=Cyamopsis tetragonoloba OX=3832 GN=ManS PE=1 SV=1 && PF13632:Glycosyl transferase family group 2
gene_QJQ45_025980	2.87391	0	PXG_PINEL	#N/A	hypothetical protein && sp|A0A1I9R3Y5|PXG_PINEL Peroxygenase OS=Pinus elliottii OX=42064 PE=1 SV=1 && PF05042:Caleosin related protein
gene_QJQ45_019428	-3.00163	0	ACEA_BACHD	#N/A	hypothetical protein && sp|Q9K9H0|ACEA_BACHD Isocitrate lyase OS=Bacillus halodurans (strain ATCC BAA-125 / DSM 18197 / FERM 7344 / JCM 9153 / C-125) OX=272558 GN=aceA PE=3 SV=1 && PF00463:Isocitrate lyase family
novel.357	-1.7795	0	AMDA_MYCSM	#N/A	- && sp|Q07838|AMDA_MYCSM Acetamidase OS=Mycolicibacterium smegmatis OX=1772 GN=amdA PE=1 SV=2 && PF03069:Acetamidase/Formamidase family
gene_QJQ45_017383	-2.1887	0	CRD1_CHLRE	CRD1	hypothetical protein && sp|Q9LD46|CRD1_CHLRE Magnesium-protoporphyrin IX monomethyl ester [oxidative] cyclase 1, chloroplastic OS=Chlamydomonas reinhardtii OX=3055 GN=CRD1 PE=2 SV=1 && PF02915:Rubrerythrin
gene_QJQ45_026540	-4.01216	0	EFMT3_XENTR	eef1akmt3	hypothetical protein && sp|Q28IN4|EFMT3_XENTR EEF1A lysine methyltransferase 3 OS=Xenopus tropicalis OX=8364 GN=eef1akmt3 PE=2 SV=1 && PF02517:Type II CAAX prenyl endopeptidase Rce1-like|PF01184:GPR1/FUN34/yaaH family|PF10294:Lysine methyltransferase
gene_QJQ45_024642	2.92556	0	NIR_SYNE7	nirA	hypothetical protein && sp|P39661|NIR_SYNE7 Ferredoxin--nitrite reductase OS=Synechococcus elongatus (strain PCC 7942 / FACHB-805) OX=1140 GN=nirA PE=3 SV=1 && PF01077:Nitrite and sulphite reductase 4Fe-4S domain|PF03460:Nitrite/Sulfite reductase ferredoxin-like half domain
novel.3961	-2.65121	0	ALO_NEUCR	alo-1	- && sp|Q7SGY1|ALO_NEUCR Putative D-arabinono-1,4-lactone oxidase OS=Neurospora crassa (strain ATCC 24698 / 74-OR23-1A / CBS 708.71 / DSM 1257 / FGSC 987) OX=367110 GN=alo-1 PE=3 SV=1 && PF01565:FAD binding domain
gene_QJQ45_001332	-2.7493	0	PCKA2_ARATH	PCK2	hypothetical protein && sp|B5X574|PCKA2_ARATH Phosphoenolpyruvate carboxykinase (ATP) 2 OS=Arabidopsis thaliana OX=3702 GN=PCK2 PE=1 SV=1 && PF01293:Phosphoenolpyruvate carboxykinase
gene_QJQ45_020732	3.557	0	GS39_BACSU	ydaD	hypothetical protein && sp|P80873|GS39_BACSU General stress protein 39 OS=Bacillus subtilis (strain 168) OX=224308 GN=ydaD PE=1 SV=3 && PF13561:Enoyl-(Acyl carrier protein) reductase|PF00106:short chain dehydrogenase
novel.915	5.38272	0	PSBS_SOLLC	PSBS	- && sp|P54773|PSBS_SOLLC Photosystem II 22 kDa protein, chloroplastic OS=Solanum lycopersicum OX=4081 GN=PSBS PE=3 SV=1 && -
gene_QJQ45_021793	2.75274	1.44e-298	NRT21_CHLRE	NRT2.1	hypothetical protein && sp|Q39608|NRT21_CHLRE Nitrate transporter 2.1 OS=Chlamydomonas reinhardtii OX=3055 GN=NRT2.1 PE=2 SV=1 && PF07690:Major Facilitator Superfamily
gene_QJQ45_027856	3.47741	1.44e-291	POLR1_ARATH	RE1	hypothetical protein && sp|Q94HW2|POLR1_ARATH Retrovirus-related Pol polyprotein from transposon RE1 OS=Arabidopsis thaliana OX=3702 GN=RE1 PE=2 SV=1 && PF07727:Reverse transcriptase (RNA-dependent DNA polymerase)|PF13976:GAG-pre-integrase domain|PF14223:gag-polypeptide of LTR copia-type|PF00665:Integrase core domain
gene_QJQ45_024779	-1.62882	2.82e-291	PCKA2_ARATH	PCK2	hypothetical protein && sp|B5X574|PCKA2_ARATH Phosphoenolpyruvate carboxykinase (ATP) 2 OS=Arabidopsis thaliana OX=3702 GN=PCK2 PE=1 SV=1 && PF01293:Phosphoenolpyruvate carboxykinase
gene_QJQ45_019814	-1.43797	8.1e-287	DOPO_RAT	Dbh	hypothetical protein && sp|Q05754|DOPO_RAT Dopamine beta-hydroxylase OS=Rattus norvegicus OX=10116 GN=Dbh PE=1 SV=1 && PF01082:Copper type II ascorbate-dependent monooxygenase, N-terminal domain|PF03712:Copper type II ascorbate-dependent monooxygenase, C-terminal domain
gene_QJQ45_001723	3.37544	2.92e-286	DODA_BETVU	DODA	hypothetical protein && sp|Q70FG7|DODA_BETVU 4,5-DOPA dioxygenase extradiol OS=Beta vulgaris OX=161934 GN=DODA PE=1 SV=1 && PF00106:short chain dehydrogenase|PF02900:Catalytic LigB subunit of aromatic ring-opening dioxygenase
gene_QJQ45_000958	2.5266	2.68e-281	PUX8_ARATH	PUX8	hypothetical protein && sp|F4JPR7|PUX8_ARATH Plant UBX domain-containing protein 8 OS=Arabidopsis thaliana OX=3702 GN=PUX8 PE=1 SV=1 && PF00789:UBX domain|PF04832:SOUL heme-binding protein
gene_QJQ45_012379	2.89986	2.94e-272	FTSH2_ORYSJ	FTSH2	hypothetical protein && sp|Q655S1|FTSH2_ORYSJ ATP-dependent zinc metalloprotease FTSH 2, chloroplastic OS=Oryza sativa subsp. japonica OX=39947 GN=FTSH2 PE=3 SV=1 && PF01434:Peptidase family M41|PF00004:ATPase family associated with various cellular activities (AAA)|PF17862:AAA+ lid domain
gene_QJQ45_015780	2.79537	1.48e-271	WWOX_CHICK	WWOX	hypothetical protein && sp|Q5F389|WWOX_CHICK WW domain-containing oxidoreductase OS=Gallus gallus OX=9031 GN=WWOX PE=2 SV=2 && PF00106:short chain dehydrogenase|PF08243:SPT2 chromatin protein
gene_QJQ45_020778	-2.05865	1.32e-270	CRD1_CHLRE	CRD1	hypothetical protein && sp|Q9LD46|CRD1_CHLRE Magnesium-protoporphyrin IX monomethyl ester [oxidative] cyclase 1, chloroplastic OS=Chlamydomonas reinhardtii OX=3055 GN=CRD1 PE=2 SV=1 && PF02915:Rubrerythrin
gene_QJQ45_026294	2.16988	1.04e-267	SRK2E_ARATH	SRK2E	hypothetical protein && sp|Q940H6|SRK2E_ARATH Serine/threonine-protein kinase SRK2E OS=Arabidopsis thaliana OX=3702 GN=SRK2E PE=1 SV=1 && PF08317:Spc7 kinetochore protein|PF00069:Protein kinase domain
gene_QJQ45_016911	2.85858	2.93e-265	NIR_SYNE7	nirA	hypothetical protein && sp|P39661|NIR_SYNE7 Ferredoxin--nitrite reductase OS=Synechococcus elongatus (strain PCC 7942 / FACHB-805) OX=1140 GN=nirA PE=3 SV=1 && PF03460:Nitrite/Sulfite reductase ferredoxin-like half domain|PF01077:Nitrite and sulphite reductase 4Fe-4S domain
novel.8429	2.81772	1.38e-264	PLPL3_HUMAN	PNPLA3	- && sp|Q9NST1|PLPL3_HUMAN 1-acylglycerol-3-phosphate O-acyltransferase PNPLA3 OS=Homo sapiens OX=9606 GN=PNPLA3 PE=1 SV=2 && PF01734:Patatin-like phospholipase
gene_QJQ45_012062	3.26262	1.77e-263	DODA_BETVU	DODA	hypothetical protein && sp|Q70FG7|DODA_BETVU 4,5-DOPA dioxygenase extradiol OS=Beta vulgaris OX=161934 GN=DODA PE=1 SV=1 && PF00106:short chain dehydrogenase|PF02900:Catalytic LigB subunit of aromatic ring-opening dioxygenase
gene_QJQ45_016706	-1.77734	6.72e-260	PGKH_CHLRE	#N/A	hypothetical protein && sp|P41758|PGKH_CHLRE Phosphoglycerate kinase, chloroplastic OS=Chlamydomonas reinhardtii OX=3055 PE=1 SV=1 && PF00162:Phosphoglycerate kinase
gene_QJQ45_009895	-2.29709	1.36e-247	ALFC_CHLRE	ALDCHL	hypothetical protein && sp|Q42690|ALFC_CHLRE Fructose-bisphosphate aldolase 1, chloroplastic OS=Chlamydomonas reinhardtii OX=3055 GN=ALDCHL PE=2 SV=2 && PF00274:Fructose-bisphosphate aldolase class-I
gene_QJQ45_028111	-1.52409	5.44e-246	GMPP1_ARATH	CYT1	hypothetical protein && sp|O22287|GMPP1_ARATH Mannose-1-phosphate guanylyltransferase 1 OS=Arabidopsis thaliana OX=3702 GN=CYT1 PE=1 SV=1 && PF00483:Nucleotidyl transferase|PF09229:Activator of Hsp90 ATPase, N-terminal
gene_QJQ45_024373	-2.03182	5.57e-241	GSA_CHLRE	GSA	hypothetical protein && sp|Q39566|GSA_CHLRE Glutamate-1-semialdehyde 2,1-aminomutase, chloroplastic OS=Chlamydomonas reinhardtii OX=3055 GN=GSA PE=2 SV=1 && PF00202:Aminotransferase class-III
gene_QJQ45_022198	-2.2041	6.54e-240	G3PA_CHLRE	GAPA	hypothetical protein && sp|P50362|G3PA_CHLRE Glyceraldehyde-3-phosphate dehydrogenase A, chloroplastic OS=Chlamydomonas reinhardtii OX=3055 GN=GAPA PE=1 SV=1 && PF00044:Glyceraldehyde 3-phosphate dehydrogenase, NAD binding domain|PF02800:Glyceraldehyde 3-phosphate dehydrogenase, C-terminal domain
gene_QJQ45_021709	-2.45101	1.73e-238	CB29_CHLRE	Lhcb4	hypothetical protein && sp|Q93WD2|CB29_CHLRE Chlorophyll a-b binding protein CP29 OS=Chlamydomonas reinhardtii OX=3055 GN=Lhcb4 PE=1 SV=3 && PF00504:Chlorophyll A-B binding protein|PF00085:Thioredoxin
gene_QJQ45_021711	-2.12069	4.03e-238	CB29_CHLRE	Lhcb4	hypothetical protein && sp|Q93WD2|CB29_CHLRE Chlorophyll a-b binding protein CP29 OS=Chlamydomonas reinhardtii OX=3055 GN=Lhcb4 PE=1 SV=3 && PF00504:Chlorophyll A-B binding protein
novel.5964	2.87015	1.6e-237	U80A2_ARATH	UGT80A2	- && sp|Q9M8Z7|U80A2_ARATH Sterol 3-beta-glucosyltransferase UGT80A2 OS=Arabidopsis thaliana OX=3702 GN=UGT80A2 PE=1 SV=1 && PF03033:Glycosyltransferase family 28 N-terminal domain
gene_QJQ45_005706	-3.39133	3.76e-234	FMDA_METME	fmdA	hypothetical protein && sp|Q50228|FMDA_METME Formamidase OS=Methylophilus methylotrophus OX=17 GN=fmdA PE=1 SV=1 && PF03069:Acetamidase/Formamidase family
gene_QJQ45_018848	1.61282	1.08e-232	THIC_ARATH	THIC	hypothetical protein && sp|O82392|THIC_ARATH Phosphomethylpyrimidine synthase, chloroplastic OS=Arabidopsis thaliana OX=3702 GN=THIC PE=1 SV=1 && PF01964:Radical SAM ThiC family
gene_QJQ45_020989	3.27327	2.63e-228	U80A2_ARATH	UGT80A2	hypothetical protein && sp|Q9M8Z7|U80A2_ARATH Sterol 3-beta-glucosyltransferase UGT80A2 OS=Arabidopsis thaliana OX=3702 GN=UGT80A2 PE=1 SV=1 && PF03033:Glycosyltransferase family 28 N-terminal domain|PF06722:Erythromycin biosynthesis protein CIII-like, C-terminal domain
gene_QJQ45_024923	-2.66847	3.05e-228	PGKH_VOLCA	PGK	hypothetical protein && sp|Q9SBN4|PGKH_VOLCA Phosphoglycerate kinase, chloroplastic OS=Volvox carteri OX=3067 GN=PGK PE=2 SV=1 && PF00162:Phosphoglycerate kinase
gene_QJQ45_000301	-3.62925	1.35e-227	FMDA_METME	fmdA	hypothetical protein && sp|Q50228|FMDA_METME Formamidase OS=Methylophilus methylotrophus OX=17 GN=fmdA PE=1 SV=1 && PF03069:Acetamidase/Formamidase family
gene_QJQ45_025658	1.78293	4.1e-227	C13AA_CAEEL	#N/A	hypothetical protein && sp|Q09653|C13AA_CAEEL Putative cytochrome P450 CYP13A10 OS=Caenorhabditis elegans OX=6239 GN=cyp-13A10 PE=3 SV=3 && PF00067:Cytochrome P450
gene_QJQ45_003703	-2.10826	9.9e-224	CHLP_TOBAC	CHLP	hypothetical protein && sp|Q9ZS34|CHLP_TOBAC Geranylgeranyl diphosphate reductase, chloroplastic OS=Nicotiana tabacum OX=4097 GN=CHLP PE=2 SV=1 && PF01494:FAD binding domain
gene_QJQ45_014369	-2.37052	2.52e-223	G3PA_CHLRE	GAPA	hypothetical protein && sp|P50362|G3PA_CHLRE Glyceraldehyde-3-phosphate dehydrogenase A, chloroplastic OS=Chlamydomonas reinhardtii OX=3055 GN=GAPA PE=1 SV=1 && PF00044:Glyceraldehyde 3-phosphate dehydrogenase, NAD binding domain|PF02800:Glyceraldehyde 3-phosphate dehydrogenase, C-terminal domain
gene_QJQ45_002233	2.55689	1.26e-220	FTSH2_ORYSJ	FTSH2	hypothetical protein && sp|Q655S1|FTSH2_ORYSJ ATP-dependent zinc metalloprotease FTSH 2, chloroplastic OS=Oryza sativa subsp. japonica OX=39947 GN=FTSH2 PE=3 SV=1 && PF01434:Peptidase family M41|PF17862:AAA+ lid domain|PF00004:ATPase family associated with various cellular activities (AAA)
gene_QJQ45_008452	-1.81336	2.64e-220	PSBP_CHLRE	PSBP	hypothetical protein && sp|P11471|PSBP_CHLRE Oxygen-evolving enhancer protein 2, chloroplastic OS=Chlamydomonas reinhardtii OX=3055 GN=PSBP PE=1 SV=1 && PF20928:PsbP, C-terminal|PF01789:PsbP
gene_QJQ45_015483	-2.57976	4.13e-219	CAPP1_CHLRE	Ppc1	hypothetical protein && sp|P81831|CAPP1_CHLRE Phosphoenolpyruvate carboxylase 1 OS=Chlamydomonas reinhardtii OX=3055 GN=Ppc1 PE=1 SV=2 && PF00311:Phosphoenolpyruvate carboxylase
novel.3897	-2.26105	1.75e-218	ALO_NEUCR	alo-1	- && sp|Q7SGY1|ALO_NEUCR Putative D-arabinono-1,4-lactone oxidase OS=Neurospora crassa (strain ATCC 24698 / 74-OR23-1A / CBS 708.71 / DSM 1257 / FGSC 987) OX=367110 GN=alo-1 PE=3 SV=1 && PF01565:FAD binding domain
novel.6494	2.92955	2.07e-218	FADH_METMR	fdh	- && sp|P47734|FADH_METMR S-(hydroxymethyl)glutathione dehydrogenase OS=Methylobacter marinus OX=34058 GN=fdh PE=3 SV=2 && -
gene_QJQ45_021909	-1.39251	5.69e-217	RBS1_CHLRE	RBCS1	hypothetical protein && sp|P00873|RBS1_CHLRE Ribulose bisphosphate carboxylase small subunit, chloroplastic 1 OS=Chlamydomonas reinhardtii OX=3055 GN=RBCS1 PE=1 SV=1 && PF00101:Ribulose bisphosphate carboxylase, small chain
gene_QJQ45_018370	-1.36361	2.42e-214	PSBO_CHLRE	PSBO	hypothetical protein && sp|P12853|PSBO_CHLRE Oxygen-evolving enhancer protein 1, chloroplastic OS=Chlamydomonas reinhardtii OX=3055 GN=PSBO PE=1 SV=1 && PF01716:Manganese-stabilising protein / photosystem II polypeptide
gene_QJQ45_003129	-1.97439	1.31e-213	YG31B_YEAST	TY3B-G	hypothetical protein && sp|Q99315|YG31B_YEAST Transposon Ty3-G Gag-Pol polyprotein OS=Saccharomyces cerevisiae (strain ATCC 204508 / S288c) OX=559292 GN=TY3B-G PE=1 SV=3 && PF17921:Integrase zinc binding domain|PF00078:Reverse transcriptase (RNA-dependent DNA polymerase)|PF17919:RNase H-like domain found in reverse transcriptase|PF19259:Ty3 transposon capsid-like protein
gene_QJQ45_020954	1.55352	2.85e-213	UGE5_ARATH	UGE5	hypothetical protein && sp|Q9SN58|UGE5_ARATH UDP-glucose 4-epimerase 5 OS=Arabidopsis thaliana OX=3702 GN=UGE5 PE=1 SV=3 && PF16363:GDP-mannose 4,6 dehydratase|PF00251:Glycosyl hydrolases family 32 N-terminal domain
gene_QJQ45_021289	2.28025	6.43e-211	UCRIB_CYAPA	#N/A	hypothetical protein && sp|Q5CC92|UCRIB_CYAPA Cytochrome b6-f complex iron-sulfur subunit 2, cyanelle OS=Cyanophora paradoxa OX=2762 GN=petC-2 PE=2 SV=1 && PF01266:FAD dependent oxidoreductase
gene_QJQ45_020019	1.32011	4.89e-210	FTSH1_ORYSJ	FTSH1	hypothetical protein && sp|Q5Z974|FTSH1_ORYSJ ATP-dependent zinc metalloprotease FTSH 1, chloroplastic OS=Oryza sativa subsp. japonica OX=39947 GN=FTSH1 PE=2 SV=1 && PF00004:ATPase family associated with various cellular activities (AAA)|PF17862:AAA+ lid domain|PF01434:Peptidase family M41
gene_QJQ45_002009	-2.14441	5.56e-210	BCP1_SCHPO	bcp1	hypothetical protein && sp|O74907|BCP1_SCHPO Protein bcp1 OS=Schizosaccharomyces pombe (strain 972 / ATCC 24843) OX=284812 GN=bcp1 PE=3 SV=2 && PF13862:BCCIP
gene_QJQ45_017502	-1.46221	7.22e-208	ALFC_CHLRE	ALDCHL	hypothetical protein && sp|Q42690|ALFC_CHLRE Fructose-bisphosphate aldolase 1, chloroplastic OS=Chlamydomonas reinhardtii OX=3055 GN=ALDCHL PE=2 SV=2 && PF00274:Fructose-bisphosphate aldolase class-I
gene_QJQ45_015768	1.98947	7.26e-208	U2A2B_ARATH	U2AF65B	hypothetical protein && sp|Q8L716|U2A2B_ARATH Splicing factor U2af large subunit B OS=Arabidopsis thaliana OX=3702 GN=U2AF65B PE=1 SV=2 && PF00106:short chain dehydrogenase|PF01477:PLAT/LH2 domain|PF00076:RNA recognition motif
gene_QJQ45_026280	1.79113	1.58e-207	SRK2A_PHYPA	SRK2A	hypothetical protein && sp|A9TF79|SRK2A_PHYPA Serine/threonine-protein kinase SRK2A OS=Physcomitrium patens OX=3218 GN=SRK2A PE=1 SV=1 && PF00069:Protein kinase domain
gene_QJQ45_011272	-1.79658	8.2e-206	BCP1_SCHPO	bcp1	hypothetical protein && sp|O74907|BCP1_SCHPO Protein bcp1 OS=Schizosaccharomyces pombe (strain 972 / ATCC 24843) OX=284812 GN=bcp1 PE=3 SV=2 && PF13862:BCCIP
gene_QJQ45_027541	1.65599	2.82e-205	MRP4_HUMAN	ABCC4	hypothetical protein && sp|O15439|MRP4_HUMAN ATP-binding cassette sub-family C member 4 OS=Homo sapiens OX=9606 GN=ABCC4 PE=1 SV=3 && PF00005:ABC transporter|PF00664:ABC transporter transmembrane region
gene_QJQ45_024902	-2.58338	7.37e-205	CB13_SOLLC	CAB8	hypothetical protein && sp|P27522|CB13_SOLLC Chlorophyll a-b binding protein 8, chloroplastic OS=Solanum lycopersicum OX=4081 GN=CAB8 PE=3 SV=1 && PF01036:Bacteriorhodopsin-like protein|PF00504:Chlorophyll A-B binding protein
gene_QJQ45_015901	-1.89919	1.83e-202	AMT15_ARATH	AMT1-5	hypothetical protein && sp|Q9LK16|AMT15_ARATH Putative ammonium transporter 1 member 5 OS=Arabidopsis thaliana OX=3702 GN=AMT1-5 PE=3 SV=1 && PF00909:Ammonium Transporter Family
gene_QJQ45_014551	-1.63114	1.12e-196	STR11_ARATH	STR11	hypothetical protein && sp|Q0WWT7|STR11_ARATH Rhodanese-like domain-containing protein 11, chloroplastic OS=Arabidopsis thaliana OX=3702 GN=STR11 PE=2 SV=1 && -
gene_QJQ45_024519	2.11545	2.18e-196	SAC7_ARATH	SAC7	hypothetical protein && sp|Q9C5G5|SAC7_ARATH Phosphoinositide phosphatase SAC7 OS=Arabidopsis thaliana OX=3702 GN=SAC7 PE=2 SV=1 && PF02383:SacI homology domain
gene_QJQ45_025145	-2.78524	2.19e-190	CB13_SOLLC	CAB8	hypothetical protein && sp|P27522|CB13_SOLLC Chlorophyll a-b binding protein 8, chloroplastic OS=Solanum lycopersicum OX=4081 GN=CAB8 PE=3 SV=1 && PF00504:Chlorophyll A-B binding protein
gene_QJQ45_019741	-3.2721	4.29e-186	CAB6_ARATH	LHCA1	hypothetical protein && sp|Q01667|CAB6_ARATH Chlorophyll a-b binding protein 6, chloroplastic OS=Arabidopsis thaliana OX=3702 GN=LHCA1 PE=1 SV=1 && PF00504:Chlorophyll A-B binding protein
novel.7249	2.64025	1.51e-184	PMP3_DEBHA	#N/A	- && sp|Q6BVN0|PMP3_DEBHA Plasma membrane proteolipid 3 OS=Debaryomyces hansenii (strain ATCC 36239 / CBS 767 / BCRC 21394 / JCM 1990 / NBRC 0083 / IGC 2968) OX=284592 GN=PMP3 PE=3 SV=1 && PF01679:Proteolipid membrane potential modulator
gene_QJQ45_023781	-2.03238	2.08e-184	CB5_ARATH	LHCB5	hypothetical protein && sp|Q9XF89|CB5_ARATH Chlorophyll a-b binding protein CP26, chloroplastic OS=Arabidopsis thaliana OX=3702 GN=LHCB5 PE=1 SV=1 && PF00504:Chlorophyll A-B binding protein
gene_QJQ45_016227	3.98949	1.87e-181	AQP4_MOUSE	Aqp4	hypothetical protein && sp|P55088|AQP4_MOUSE Aquaporin-4 OS=Mus musculus OX=10090 GN=Aqp4 PE=1 SV=2 && PF00230:Major intrinsic protein
gene_QJQ45_027628	1.92765	1.39e-180	GGH1_ARATH	GGH1	hypothetical protein && sp|Q9SYL6|GGH1_ARATH Gamma-glutamyl hydrolase 1 OS=Arabidopsis thaliana OX=3702 GN=GGH1 PE=2 SV=1 && PF07722:Peptidase C26
gene_QJQ45_006649	2.5157	3.15e-179	NRT21_CHLRE	NRT2.1	hypothetical protein && sp|Q39608|NRT21_CHLRE Nitrate transporter 2.1 OS=Chlamydomonas reinhardtii OX=3055 GN=NRT2.1 PE=2 SV=1 && PF07690:Major Facilitator Superfamily
gene_QJQ45_021132	1.39119	3.37e-179	UGE5_ARATH	UGE5	hypothetical protein && sp|Q9SN58|UGE5_ARATH UDP-glucose 4-epimerase 5 OS=Arabidopsis thaliana OX=3702 GN=UGE5 PE=1 SV=3 && PF00251:Glycosyl hydrolases family 32 N-terminal domain|PF16363:GDP-mannose 4,6 dehydratase
gene_QJQ45_004470	-1.49917	2.8e-178	CB2_CHLMO	#N/A	hypothetical protein && sp|P22686|CB2_CHLMO Chlorophyll a-b binding protein of LHCII type I, chloroplastic OS=Chlamydomonas moewusii OX=3054 PE=2 SV=1 && PF00504:Chlorophyll A-B binding protein
novel.1399	3.49743	1.44e-177	PSBS1_CHLRE	PSBS1	- && sp|A8HPM2|PSBS1_CHLRE Photosystem II protein PSBS1 OS=Chlamydomonas reinhardtii OX=3055 GN=PSBS1 PE=1 SV=1 && -
gene_QJQ45_027399	-1.58337	1.82e-177	PXN_ARATH	PXN	hypothetical protein && sp|O04200|PXN_ARATH Peroxisomal nicotinamide adenine dinucleotide carrier OS=Arabidopsis thaliana OX=3702 GN=PXN PE=1 SV=1 && PF00153:Mitochondrial carrier protein
gene_QJQ45_011707	-1.69695	1.66e-175	AMT11_ORYSJ	AMT1-1	hypothetical protein && sp|Q7XQ12|AMT11_ORYSJ Ammonium transporter 1 member 1 OS=Oryza sativa subsp. japonica OX=39947 GN=AMT1-1 PE=2 SV=1 && PF00909:Ammonium Transporter Family
gene_QJQ45_025737	2.23551	3.94e-174	HGPRT_BACSU	hprT	hypothetical protein && sp|P37472|HGPRT_BACSU Hypoxanthine-guanine phosphoribosyltransferase OS=Bacillus subtilis (strain 168) OX=224308 GN=hprT PE=3 SV=1 && PF00156:Phosphoribosyl transferase domain
gene_QJQ45_015948	-2.25934	3.1e-172	NHAAB_MONBE	37534	hypothetical protein && sp|A9V2C1|NHAAB_MONBE Probable nitrile hydratase OS=Monosiga brevicollis OX=81824 GN=37534 PE=3 SV=1 && PF02979:Nitrile hydratase, alpha chain|PF21006:Nitrile hydratase beta subunit, N-terminal
gene_QJQ45_017792	1.67894	9.6e-172	C13AA_CAEEL	#N/A	hypothetical protein && sp|Q09653|C13AA_CAEEL Putative cytochrome P450 CYP13A10 OS=Caenorhabditis elegans OX=6239 GN=cyp-13A10 PE=3 SV=3 && PF00067:Cytochrome P450
gene_QJQ45_026475	-1.79321	4.2e-171	CHLP_TOBAC	CHLP	hypothetical protein && sp|Q9ZS34|CHLP_TOBAC Geranylgeranyl diphosphate reductase, chloroplastic OS=Nicotiana tabacum OX=4097 GN=CHLP PE=2 SV=1 && -
gene_QJQ45_017033	-2.16796	7.18e-168	GLGL1_ORYSJ	AGPL1	hypothetical protein && sp|Q6AVT2|GLGL1_ORYSJ Glucose-1-phosphate adenylyltransferase large subunit 1, chloroplastic/amyloplastic OS=Oryza sativa subsp. japonica OX=39947 GN=AGPL1 PE=1 SV=1 && PF00483:Nucleotidyl transferase
gene_QJQ45_009088	-2.00099	1.36e-167	HS16A_WHEAT	hsp16.9A	hypothetical protein && sp|P12810|HS16A_WHEAT 16.9 kDa class I heat shock protein 1 OS=Triticum aestivum OX=4565 GN=hsp16.9A PE=2 SV=1 && PF00011:Hsp20/alpha crystallin family
gene_QJQ45_013052	-2.93607	1.52e-166	CHLH_ORYSI	CHLH	hypothetical protein && sp|B8ANF1|CHLH_ORYSI Magnesium-chelatase subunit ChlH, chloroplastic OS=Oryza sativa subsp. indica OX=39946 GN=CHLH PE=3 SV=1 && PF02514:CobN/Magnesium Chelatase
gene_QJQ45_011676	-1.64836	3.46e-165	ALFC_CHLRE	ALDCHL	hypothetical protein && sp|Q42690|ALFC_CHLRE Fructose-bisphosphate aldolase 1, chloroplastic OS=Chlamydomonas reinhardtii OX=3055 GN=ALDCHL PE=2 SV=2 && PF00274:Fructose-bisphosphate aldolase class-I|PF04427:Brix domain
gene_QJQ45_008656	1.82297	1.7e-163	LHSR1_CHLRE	LHCSR1	hypothetical protein && sp|P93664|LHSR1_CHLRE Light-harvesting complex stress-related protein 1, chloroplastic OS=Chlamydomonas reinhardtii OX=3055 GN=LHCSR1 PE=1 SV=1 && PF00504:Chlorophyll A-B binding protein
gene_QJQ45_016141	-1.58811	1.15e-162	GLPX_MYCBO	glpX	hypothetical protein && sp|Q7U0N5|GLPX_MYCBO Fructose-1,6-bisphosphatase class 2 OS=Mycobacterium bovis (strain ATCC BAA-935 / AF2122/97) OX=233413 GN=glpX PE=3 SV=2 && PF03320:Bacterial fructose-1,6-bisphosphatase, glpX-encoded
gene_QJQ45_017511	2.11972	4.21e-161	DPCHH_COLHI	#N/A	hypothetical protein && sp|A0A1B7YCL6|DPCHH_COLHI Short chain dehydrogenase/reductase dpchH OS=Colletotrichum higginsianum (strain IMI 349063) OX=759273 GN=dpchH PE=1 SV=1 && PF00106:short chain dehydrogenase
gene_QJQ45_024489	2.68127	1.08e-160	GCYB2_RAT	Gucy1b2	hypothetical protein && sp|P22717|GCYB2_RAT Guanylate cyclase soluble subunit beta-2 OS=Rattus norvegicus OX=10116 GN=Gucy1b2 PE=2 SV=1 && PF00211:Adenylate and Guanylate cyclase catalytic domain
novel.2670	-1.22576	2.04e-160	PPDK1_ORYSJ	PPDK1	- && sp|Q6AVA8|PPDK1_ORYSJ Pyruvate, phosphate dikinase 1, chloroplastic OS=Oryza sativa subsp. japonica OX=39947 GN=PPDK1 PE=1 SV=1 && PF02896:PEP-utilising enzyme, PEP-binding domain|PF00391:PEP-utilising enzyme, mobile domain
gene_QJQ45_002551	-1.5253	1.02e-159	PSBO_CHLRE	PSBO	hypothetical protein && sp|P12853|PSBO_CHLRE Oxygen-evolving enhancer protein 1, chloroplastic OS=Chlamydomonas reinhardtii OX=3055 GN=PSBO PE=1 SV=1 && PF01716:Manganese-stabilising protein / photosystem II polypeptide
novel.2399	-1.26883	7.46e-158	PPDK1_ORYSJ	PPDK1	- && sp|Q6AVA8|PPDK1_ORYSJ Pyruvate, phosphate dikinase 1, chloroplastic OS=Oryza sativa subsp. japonica OX=39947 GN=PPDK1 PE=1 SV=1 && PF00391:PEP-utilising enzyme, mobile domain|PF02896:PEP-utilising enzyme, PEP-binding domain|PF01326:Pyruvate phosphate dikinase, AMP/ATP-binding domain
gene_QJQ45_002402	-2.78773	8.82e-158	CB29_CHLRE	Lhcb4	hypothetical protein && sp|Q93WD2|CB29_CHLRE Chlorophyll a-b binding protein CP29 OS=Chlamydomonas reinhardtii OX=3055 GN=Lhcb4 PE=1 SV=3 && PF00504:Chlorophyll A-B binding protein
gene_QJQ45_003700	1.30284	1.11e-157	TRM11_MOUSE	Trmt11	hypothetical protein && sp|Q9CWH5|TRM11_MOUSE tRNA (guanine(10)-N2)-methyltransferase homolog OS=Mus musculus OX=10090 GN=Trmt11 PE=1 SV=1 && PF00686:Starch binding domain
gene_QJQ45_024035	-1.26664	1.69e-157	VPS45_ARATH	VPS45	hypothetical protein && sp|O49048|VPS45_ARATH Vacuolar protein sorting-associated protein 45 homolog OS=Arabidopsis thaliana OX=3702 GN=VPS45 PE=1 SV=2 && PF00160:Cyclophilin type peptidyl-prolyl cis-trans isomerase/CLD|PF00443:Ubiquitin carboxyl-terminal hydrolase|PF00995:Sec1 family|PF13460:NAD(P)H-binding
gene_QJQ45_018443	1.47734	3.88e-153	PDAT_SCHPO	plh1	hypothetical protein && sp|O94680|PDAT_SCHPO Phospholipid:diacylglycerol acyltransferase OS=Schizosaccharomyces pombe (strain 972 / ATCC 24843) OX=284812 GN=plh1 PE=1 SV=2 && PF02450:Lecithin:cholesterol acyltransferase
novel.2330	-1.48614	2.61e-152	CP12_CHLRE	CP12	- && sp|A6Q0K5|CP12_CHLRE Calvin cycle protein CP12, chloroplastic OS=Chlamydomonas reinhardtii OX=3055 GN=CP12 PE=1 SV=2 && -
gene_QJQ45_015374	-1.32806	5.42e-152	PCKA2_ARATH	PCK2	hypothetical protein && sp|B5X574|PCKA2_ARATH Phosphoenolpyruvate carboxykinase (ATP) 2 OS=Arabidopsis thaliana OX=3702 GN=PCK2 PE=1 SV=1 && PF01293:Phosphoenolpyruvate carboxykinase
gene_QJQ45_016777	-2.52832	2.49e-149	TF212_SCHPO	Tf2-12	hypothetical protein && sp|P0CT41|TF212_SCHPO Transposon Tf2-12 polyprotein OS=Schizosaccharomyces pombe (strain 972 / ATCC 24843) OX=284812 GN=Tf2-12 PE=3 SV=1 && PF00385:Chromo (CHRromatin Organisation MOdifier) domain|PF00078:Reverse transcriptase (RNA-dependent DNA polymerase)|PF00011:Hsp20/alpha crystallin family|PF00665:Integrase core domain|PF17917:RNase H-like domain found in reverse tran…
gene_QJQ45_025885	3.15427	3.15e-149	RDH11_MOUSE	Rdh11	hypothetical protein && sp|Q9QYF1|RDH11_MOUSE Retinol dehydrogenase 11 OS=Mus musculus OX=10090 GN=Rdh11 PE=1 SV=2 && PF00106:short chain dehydrogenase
gene_QJQ45_028169	-3.6347	8.27e-148	CA4_ARATH	LHCA4	hypothetical protein && sp|P27521|CA4_ARATH Chlorophyll a-b binding protein 4, chloroplastic OS=Arabidopsis thaliana OX=3702 GN=LHCA4 PE=1 SV=1 && PF17681:Gamma tubulin complex component N-terminal|PF00504:Chlorophyll A-B binding protein
gene_QJQ45_021911	-1.60126	1.32e-146	RBS1_CHLRE	RBCS1	hypothetical protein && sp|P00873|RBS1_CHLRE Ribulose bisphosphate carboxylase small subunit, chloroplastic 1 OS=Chlamydomonas reinhardtii OX=3055 GN=RBCS1 PE=1 SV=1 && PF00101:Ribulose bisphosphate carboxylase, small chain
gene_QJQ45_028948	-2.16159	8.02e-146	GLGL1_ORYSJ	AGPL1	hypothetical protein && sp|Q6AVT2|GLGL1_ORYSJ Glucose-1-phosphate adenylyltransferase large subunit 1, chloroplastic/amyloplastic OS=Oryza sativa subsp. japonica OX=39947 GN=AGPL1 PE=1 SV=1 && PF00483:Nucleotidyl transferase
gene_QJQ45_022093	2.50586	2.21e-145	DRPE_CRAPL	#N/A	hypothetical protein && sp|P22242|DRPE_CRAPL Desiccation-related protein PCC13-62 OS=Craterostigma plantagineum OX=4153 PE=2 SV=1 && PF13668:Ferritin-like domain
gene_QJQ45_028158	-2.04958	9.77e-143	POR_CHLRE	PORA	hypothetical protein && sp|Q39617|POR_CHLRE Protochlorophyllide reductase, chloroplastic OS=Chlamydomonas reinhardtii OX=3055 GN=PORA PE=3 SV=1 && PF00106:short chain dehydrogenase
gene_QJQ45_016170	-1.1397	1.28e-141	CA4_ARATH	LHCA4	hypothetical protein && sp|P27521|CA4_ARATH Chlorophyll a-b binding protein 4, chloroplastic OS=Arabidopsis thaliana OX=3702 GN=LHCA4 PE=1 SV=1 && PF00504:Chlorophyll A-B binding protein
gene_QJQ45_020938	-2.43758	4.72e-141	CAPP1_CHLRE	Ppc1	hypothetical protein && sp|P81831|CAPP1_CHLRE Phosphoenolpyruvate carboxylase 1 OS=Chlamydomonas reinhardtii OX=3055 GN=Ppc1 PE=1 SV=2 && PF00311:Phosphoenolpyruvate carboxylase
gene_QJQ45_011613	1.33916	1.25e-140	GWD1_CITRE	R1	hypothetical protein && sp|Q8LPT9|GWD1_CITRE Alpha-glucan water dikinase, chloroplastic OS=Citrus reticulata OX=85571 GN=R1 PE=2 SV=1 && PF01326:Pyruvate phosphate dikinase, AMP/ATP-binding domain
gene_QJQ45_017109	-1.93673	7.26e-140	CHLI_CHLRE	CHLI	hypothetical protein && sp|Q94FT3|CHLI_CHLRE Magnesium-chelatase subunit ChlI, chloroplastic OS=Chlamydomonas reinhardtii OX=3055 GN=CHLI PE=2 SV=1 && PF17863:AAA lid domain
gene_QJQ45_026329	3.46317	1.86e-139	PHO4_NEUCR	pho-4	hypothetical protein && sp|P15710|PHO4_NEUCR Phosphate-repressible phosphate permease pho-4 OS=Neurospora crassa (strain ATCC 24698 / 74-OR23-1A / CBS 708.71 / DSM 1257 / FGSC 987) OX=367110 GN=pho-4 PE=1 SV=1 && PF01384:Phosphate transporter family
gene_QJQ45_021728	-1.6742	2.07e-139	HEM2_CHLRE	HEMB	hypothetical protein && sp|Q42682|HEM2_CHLRE Delta-aminolevulinic acid dehydratase, chloroplastic OS=Chlamydomonas reinhardtii OX=3055 GN=HEMB PE=2 SV=1 && PF00490:Delta-aminolevulinic acid dehydratase
gene_QJQ45_026145	1.58324	2.59e-137	PDAT_SCHPO	plh1	hypothetical protein && sp|O94680|PDAT_SCHPO Phospholipid:diacylglycerol acyltransferase OS=Schizosaccharomyces pombe (strain 972 / ATCC 24843) OX=284812 GN=plh1 PE=1 SV=2 && PF02450:Lecithin:cholesterol acyltransferase
gene_QJQ45_027204	2.23807	1.68e-135	VANA_PSEUH	vanA	hypothetical protein && sp|O05616|VANA_PSEUH Vanillate O-demethylase oxygenase subunit OS=Pseudomonas sp. (strain HR199 / DSM 7063) OX=86003 GN=vanA PE=3 SV=1 && PF00355:Rieske [2Fe-2S] domain|PF19112:Vanillate O-demethylase oxygenase C-terminal domain
gene_QJQ45_011404	-1.54683	1.84e-135	S17P_CHLRE	CSBP	hypothetical protein && sp|P46284|S17P_CHLRE Sedoheptulose-1,7-bisphosphatase, chloroplastic OS=Chlamydomonas reinhardtii OX=3055 GN=CSBP PE=2 SV=1 && PF00364:Biotin-requiring enzyme|PF00316:Fructose-1-6-bisphosphatase, N-terminal domain|PF18913:Fructose-1-6-bisphosphatase, C-terminal domain
gene_QJQ45_028062	-1.56814	1.71e-134	S17P_CHLRE	CSBP	hypothetical protein && sp|P46284|S17P_CHLRE Sedoheptulose-1,7-bisphosphatase, chloroplastic OS=Chlamydomonas reinhardtii OX=3055 GN=CSBP PE=2 SV=1 && PF06026:Ribose 5-phosphate isomerase A (phosphoriboisomerase A)|PF18913:Fructose-1-6-bisphosphatase, C-terminal domain|PF00364:Biotin-requiring enzyme|PF00316:Fructose-1-6-bisphosphatase, N-terminal domain|PF00288:GHMP kinases N terminal domain
gene_QJQ45_016057	-1.54909	4.58e-133	HEM11_ARATH	HEMA1	hypothetical protein && sp|P42804|HEM11_ARATH Glutamyl-tRNA reductase 1, chloroplastic OS=Arabidopsis thaliana OX=3702 GN=HEMA1 PE=1 SV=2 && PF00745:Glutamyl-tRNAGlu reductase, dimerisation domain|PF01488:Shikimate / quinate 5-dehydrogenase|PF05201:Glutamyl-tRNAGlu reductase, N-terminal domain
gene_QJQ45_001539	1.41318	9.52e-133	GWD1_SOLTU	R1	hypothetical protein && sp|Q9AWA5|GWD1_SOLTU Alpha-glucan water dikinase, chloroplastic OS=Solanum tuberosum OX=4113 GN=R1 PE=1 SV=2 && PF04937:Protein of unknown function (DUF 659)|PF01326:Pyruvate phosphate dikinase, AMP/ATP-binding domain
gene_QJQ45_026695	1.30581	1.98e-132	IM30_ORYSJ	#N/A	hypothetical protein && sp|Q8S0J7|IM30_ORYSJ Probable membrane-associated 30 kDa protein, chloroplastic OS=Oryza sativa subsp. japonica OX=39947 GN=Os01g0895100 PE=1 SV=1 && PF04012:PspA/IM30 family
novel.8652	-1.3236	1.04e-130	PPDK1_ARATH	PPDK	- && sp|O23404|PPDK1_ARATH Pyruvate, phosphate dikinase 1, chloroplastic OS=Arabidopsis thaliana OX=3702 GN=PPDK PE=1 SV=2 && PF01326:Pyruvate phosphate dikinase, AMP/ATP-binding domain
gene_QJQ45_019472	1.29609	2.92e-130	CRTW_HAELA	#N/A	hypothetical protein && sp|Q39982|CRTW_HAELA Beta-carotene ketolase OS=Haematococcus lacustris OX=44745 PE=2 SV=1 && PF11069:Cilia- and flagella-associated protein 298|PF00487:Fatty acid desaturase|PF00686:Starch binding domain
gene_QJQ45_016446	-1.16029	6.56e-130	CB2_CHLRE	cabII-1	hypothetical protein && sp|P14273|CB2_CHLRE Chlorophyll a-b binding protein of LHCII type I, chloroplastic OS=Chlamydomonas reinhardtii OX=3055 GN=cabII-1 PE=3 SV=1 && PF00504:Chlorophyll A-B binding protein
gene_QJQ45_022418	-2.13482	1.34e-129	RENT1_NEUCR	2E4.130	hypothetical protein && sp|Q9HEH1|RENT1_NEUCR Regulator of nonsense transcripts 1 homolog OS=Neurospora crassa (strain ATCC 24698 / 74-OR23-1A / CBS 708.71 / DSM 1257 / FGSC 987) OX=367110 GN=2E4.130 PE=3 SV=1 && PF13086:AAA domain|PF13087:AAA domain
gene_QJQ45_024144	1.62275	4.16e-129	BKT3_HAELA	BKT3	hypothetical protein && sp|Q6J3N5|BKT3_HAELA Beta-carotene 4-ketolase 3 OS=Haematococcus lacustris OX=44745 GN=BKT3 PE=1 SV=1 && PF00487:Fatty acid desaturase
gene_QJQ45_011431	3.33355	1.53e-128	RDH11_MOUSE	Rdh11	hypothetical protein && sp|Q9QYF1|RDH11_MOUSE Retinol dehydrogenase 11 OS=Mus musculus OX=10090 GN=Rdh11 PE=1 SV=2 && PF00106:short chain dehydrogenase
gene_QJQ45_029231	1.41909	1.74e-128	THIC_ARATH	THIC	hypothetical protein && sp|O82392|THIC_ARATH Phosphomethylpyrimidine synthase, chloroplastic OS=Arabidopsis thaliana OX=3702 GN=THIC PE=1 SV=1 && PF00005:ABC transporter|PF01964:Radical SAM ThiC family
gene_QJQ45_021124	-1.48866	5.28e-128	RCA_CHLRE	#N/A	hypothetical protein && sp|P23489|RCA_CHLRE Ribulose bisphosphate carboxylase/oxygenase activase, chloroplastic OS=Chlamydomonas reinhardtii OX=3055 PE=2 SV=1 && PF21228:Ribulose bisphosphate carboxylase/oxygenase activase, AAA, helical|PF00004:ATPase family associated with various cellular activities (AAA)
gene_QJQ45_014503	-1.42258	1.58e-127	PSBQ_CHLRE	PSBQ	hypothetical protein && sp|P12852|PSBQ_CHLRE Oxygen-evolving enhancer protein 3, chloroplastic OS=Chlamydomonas reinhardtii OX=3055 GN=PSBQ PE=1 SV=1 && PF05757:Oxygen evolving enhancer protein 3 (PsbQ)
gene_QJQ45_015441	1.57633	4.66e-127	SYM1_USTMA	#N/A	hypothetical protein && sp|Q4P9K6|SYM1_USTMA Protein SYM1 OS=Ustilago maydis (strain 521 / FGSC 9021) OX=237631 GN=SYM1 PE=3 SV=1 && PF04117:Mpv17 / PMP22 family
gene_QJQ45_025736	-1.58811	4.76e-127	MASY_NEUCR	acu-9	hypothetical protein && sp|P28345|MASY_NEUCR Malate synthase, glyoxysomal OS=Neurospora crassa (strain ATCC 24698 / 74-OR23-1A / CBS 708.71 / DSM 1257 / FGSC 987) OX=367110 GN=acu-9 PE=3 SV=2 && PF01274:Malate synthase, TIM barrel domain
gene_QJQ45_014218	-1.86128	6.58e-127	SSG1_MANES	WAXY	hypothetical protein && sp|Q43784|SSG1_MANES Granule-bound starch synthase 1, chloroplastic/amyloplastic OS=Manihot esculenta OX=3983 GN=WAXY PE=2 SV=1 && PF00534:Glycosyl transferases group 1|PF08323:Starch synthase catalytic domain
gene_QJQ45_029371	1.58723	1.35e-125	Y5390_ARATH	At5g03900	hypothetical protein && sp|Q8GW20|Y5390_ARATH Uncharacterized protein At5g03900, chloroplastic OS=Arabidopsis thaliana OX=3702 GN=At5g03900 PE=2 SV=2 && -
novel.1810	4.47235	2.42e-125	PSBS1_CHLRE	PSBS1	- && sp|A8HPM2|PSBS1_CHLRE Photosystem II protein PSBS1 OS=Chlamydomonas reinhardtii OX=3055 GN=PSBS1 PE=1 SV=1 && -
gene_QJQ45_008439	-1.0586	2.58e-125	CB2_DUNTE	#N/A	hypothetical protein && sp|P27517|CB2_DUNTE Chlorophyll a-b binding protein of LHCII type I, chloroplastic OS=Dunaliella tertiolecta OX=3047 PE=2 SV=1 && PF07727:Reverse transcriptase (RNA-dependent DNA polymerase)|PF00665:Integrase core domain|PF14223:gag-polypeptide of LTR copia-type|PF00504:Chlorophyll A-B binding protein
novel.3965	2.43779	3.68e-125	GSHRP_ARATH	EMB2360	- && sp|P42770|GSHRP_ARATH Glutathione reductase, chloroplastic OS=Arabidopsis thaliana OX=3702 GN=EMB2360 PE=2 SV=1 && PF07992:Pyridine nucleotide-disulphide oxidoreductase
gene_QJQ45_027702	1.39145	1.24e-124	U2A2B_ARATH	U2AF65B	hypothetical protein && sp|Q8L716|U2A2B_ARATH Splicing factor U2af large subunit B OS=Arabidopsis thaliana OX=3702 GN=U2AF65B PE=1 SV=2 && PF04194:Programmed cell death protein 2, C-terminal putative domain|PF01477:PLAT/LH2 domain|PF00076:RNA recognition motif|PF00106:short chain dehydrogenase
gene_QJQ45_012161	-1.23976	7.72e-124	AMT13_SOLLC	AMT1-3	hypothetical protein && sp|Q9FVN0|AMT13_SOLLC Ammonium transporter 1 member 3 OS=Solanum lycopersicum OX=4081 GN=AMT1-3 PE=2 SV=1 && PF00909:Ammonium Transporter Family
gene_QJQ45_016251	-3.09519	1.5e-123	HEM3_ORYSJ	HEMC	hypothetical protein && sp|Q6H6D2|HEM3_ORYSJ Porphobilinogen deaminase, chloroplastic OS=Oryza sativa subsp. japonica OX=39947 GN=HEMC PE=2 SV=1 && PF03900:Porphobilinogen deaminase, C-terminal domain|PF01379:Porphobilinogen deaminase, dipyromethane cofactor binding domain
gene_QJQ45_028151	-2.02658	6.23e-123	VATD_ARATH	VHA-D	hypothetical protein && sp|Q9XGM1|VATD_ARATH V-type proton ATPase subunit D OS=Arabidopsis thaliana OX=3702 GN=VHA-D PE=1 SV=2 && PF01813:ATP synthase subunit D
gene_QJQ45_022238	3.64828	7.08e-123	PSBS1_CHLRE	PSBS1	hypothetical protein && sp|A8HPM2|PSBS1_CHLRE Photosystem II protein PSBS1 OS=Chlamydomonas reinhardtii OX=3055 GN=PSBS1 PE=1 SV=1 && -
gene_QJQ45_021780	-3.6126	7.73e-123	S23A1_HUMAN	SLC23A1	hypothetical protein && sp|Q9UHI7|S23A1_HUMAN Solute carrier family 23 member 1 OS=Homo sapiens OX=9606 GN=SLC23A1 PE=1 SV=3 && PF00860:Permease family
novel.7193	-2.03342	9.42e-123	NHAAB_MONBE	37534	- && sp|A9V2C1|NHAAB_MONBE Probable nitrile hydratase OS=Monosiga brevicollis OX=81824 GN=37534 PE=3 SV=1 && PF02979:Nitrile hydratase, alpha chain
gene_QJQ45_009738	1.40159	3.34e-121	BGAL_PYRWO	#N/A	hypothetical protein && sp|O52629|BGAL_PYRWO Beta-galactosidase OS=Pyrococcus woesei OX=2262 PE=1 SV=1 && PF00232:Glycosyl hydrolase family 1
gene_QJQ45_017020	-4.08806	3.16e-120	XDH2_HALVD	HVO_B0029	hypothetical protein && sp|D4GP30|XDH2_HALVD D-xylose 1-dehydrogenase (NADP(+)) 2 OS=Haloferax volcanii (strain ATCC 29605 / DSM 3757 / JCM 8879 / NBRC 14742 / NCIMB 2012 / VKM B-1768 / DS2) OX=309800 GN=HVO_B0029 PE=1 SV=1 && PF01408:Oxidoreductase family, NAD-binding Rossmann fold
gene_QJQ45_016860	2.45081	5.83e-120	SAC8_ARATH	SAC8	hypothetical protein && sp|Q96328|SAC8_ARATH Phosphoinositide phosphatase SAC8 OS=Arabidopsis thaliana OX=3702 GN=SAC8 PE=2 SV=1 && PF02383:SacI homology domain
gene_QJQ45_000555	1.1011	2.48e-119	6PGD3_ARATH	PGD3	hypothetical protein && sp|Q9FFR3|6PGD3_ARATH 6-phosphogluconate dehydrogenase, decarboxylating 3, chloroplastic OS=Arabidopsis thaliana OX=3702 GN=PGD3 PE=1 SV=1 && PF00393:6-phosphogluconate dehydrogenase, C-terminal domain|PF03446:NAD binding domain of 6-phosphogluconate dehydrogenase
gene_QJQ45_010602	-2.60938	4.84e-118	PGKH_VOLCA	PGK	hypothetical protein && sp|Q9SBN4|PGKH_VOLCA Phosphoglycerate kinase, chloroplastic OS=Volvox carteri OX=3067 GN=PGK PE=2 SV=1 && PF00162:Phosphoglycerate kinase
gene_QJQ45_015950	-1.67026	5.96e-118	CAO_CHLRE	CAO	hypothetical protein && sp|Q9ZWM5|CAO_CHLRE Chlorophyllide a oxygenase, chloroplastic OS=Chlamydomonas reinhardtii OX=3055 GN=CAO PE=2 SV=2 && PF00355:Rieske [2Fe-2S] domain|PF08417:Pheophorbide a oxygenase
gene_QJQ45_018358	2.52583	1.08e-117	PPME1_MOUSE	Ppme1	hypothetical protein && sp|Q8BVQ5|PPME1_MOUSE Protein phosphatase methylesterase 1 OS=Mus musculus OX=10090 GN=Ppme1 PE=1 SV=5 && PF12697:Alpha/beta hydrolase family
gene_QJQ45_016113	1.98731	8.65e-117	DRPE_CRAPL	#N/A	hypothetical protein && sp|P22242|DRPE_CRAPL Desiccation-related protein PCC13-62 OS=Craterostigma plantagineum OX=4153 PE=2 SV=1 && PF13668:Ferritin-like domain
gene_QJQ45_002570	-1.42581	8.66e-117	HS16A_WHEAT	hsp16.9A	hypothetical protein && sp|P12810|HS16A_WHEAT 16.9 kDa class I heat shock protein 1 OS=Triticum aestivum OX=4565 GN=hsp16.9A PE=2 SV=1 && PF00011:Hsp20/alpha crystallin family
gene_QJQ45_024799	-1.14831	6.27e-116	MAF1_XENLA	maf1	hypothetical protein && sp|Q7ZWL6|MAF1_XENLA Repressor of RNA polymerase III transcription MAF1 homolog OS=Xenopus laevis OX=8355 GN=maf1 PE=2 SV=1 && PF09174:Maf1 regulator
gene_QJQ45_010419	2.55779	3.06e-115	UVSE_BACVZ	uvsE	hypothetical protein && sp|A7Z9T8|UVSE_BACVZ UV DNA damage endonuclease OS=Bacillus velezensis (strain DSM 23117 / BGSC 10A6 / FZB42) OX=326423 GN=uvsE PE=3 SV=1 && PF03851:UV-endonuclease UvdE
gene_QJQ45_015040	3.41882	4.35e-115	NIA_VOLCA	NITA	hypothetical protein && sp|P36841|NIA_VOLCA Nitrate reductase [NADH] OS=Volvox carteri OX=3067 GN=NITA PE=2 SV=1 && PF00174:Oxidoreductase molybdopterin binding domain|PF00175:Oxidoreductase NAD-binding domain|PF00173:Cytochrome b5-like Heme/Steroid binding domain|PF00970:Oxidoreductase FAD-binding domain|PF03404:Mo-co oxidoreductase dimerisation domain
gene_QJQ45_028581	-2.9929	5.71e-114	HEM3_ORYSJ	HEMC	hypothetical protein && sp|Q6H6D2|HEM3_ORYSJ Porphobilinogen deaminase, chloroplastic OS=Oryza sativa subsp. japonica OX=39947 GN=HEMC PE=2 SV=1 && PF03900:Porphobilinogen deaminase, C-terminal domain|PF01379:Porphobilinogen deaminase, dipyromethane cofactor binding domain
gene_QJQ45_022774	-2.72821	8.05e-114	ACS_ARATH	ACS	hypothetical protein && sp|B9DGD6|ACS_ARATH Acetyl-coenzyme A synthetase, chloroplastic/glyoxysomal OS=Arabidopsis thaliana OX=3702 GN=ACS PE=1 SV=1 && PF13193:AMP-binding enzyme C-terminal domain
gene_QJQ45_029180	3.05019	1.55e-113	FADH_METMR	fdh	hypothetical protein && sp|P47734|FADH_METMR S-(hydroxymethyl)glutathione dehydrogenase OS=Methylobacter marinus OX=34058 GN=fdh PE=3 SV=2 && PF08240:Alcohol dehydrogenase GroES-like domain
gene_QJQ45_016686	-2.10683	4.14e-113	CB13_SOLLC	CAB8	hypothetical protein && sp|P27522|CB13_SOLLC Chlorophyll a-b binding protein 8, chloroplastic OS=Solanum lycopersicum OX=4081 GN=CAB8 PE=3 SV=1 && PF00512:His Kinase A (phospho-acceptor) domain|PF00504:Chlorophyll A-B binding protein|PF01036:Bacteriorhodopsin-like protein
gene_QJQ45_017696	-1.46453	3.94e-112	MASY_EMENI	acuE	hypothetical protein && sp|P28344|MASY_EMENI Malate synthase, glyoxysomal OS=Emericella nidulans (strain FGSC A4 / ATCC 38163 / CBS 112.46 / NRRL 194 / M139) OX=227321 GN=acuE PE=3 SV=3 && PF20659:Malate synthase, C-terminal|PF01274:Malate synthase, TIM barrel domain
gene_QJQ45_020407	-1.87775	5.69e-112	SSG1_MANES	WAXY	hypothetical protein && sp|Q43784|SSG1_MANES Granule-bound starch synthase 1, chloroplastic/amyloplastic OS=Manihot esculenta OX=3983 GN=WAXY PE=2 SV=1 && PF00534:Glycosyl transferases group 1|PF08323:Starch synthase catalytic domain
gene_QJQ45_020009	3.53483	8.21e-112	DEGP1_ARATH	DEGP1	hypothetical protein && sp|O22609|DEGP1_ARATH Protease Do-like 1, chloroplastic OS=Arabidopsis thaliana OX=3702 GN=DEGP1 PE=1 SV=2 && PF13180:PDZ domain|PF13365:Trypsin-like peptidase domain
novel.7389	2.74612	8.32e-112	PMP3_DEBHA	#N/A	- && sp|Q6BVN0|PMP3_DEBHA Plasma membrane proteolipid 3 OS=Debaryomyces hansenii (strain ATCC 36239 / CBS 767 / BCRC 21394 / JCM 1990 / NBRC 0083 / IGC 2968) OX=284592 GN=PMP3 PE=3 SV=1 && PF01679:Proteolipid membrane potential modulator
gene_QJQ45_018226	-1.95128	1.59e-111	CTH1_CHLRE	CTH1	hypothetical protein && sp|Q9AR22|CTH1_CHLRE Magnesium-protoporphyrin IX monomethyl ester [oxidative] cyclase 2, chloroplastic OS=Chlamydomonas reinhardtii OX=3055 GN=CTH1 PE=2 SV=1 && PF02915:Rubrerythrin
gene_QJQ45_026242	-1.48543	2.99e-111	LHCA5_ARATH	LHCA5	hypothetical protein && sp|Q9C639|LHCA5_ARATH Photosystem I chlorophyll a/b-binding protein 5, chloroplastic OS=Arabidopsis thaliana OX=3702 GN=LHCA5 PE=1 SV=1 && PF00504:Chlorophyll A-B binding protein
gene_QJQ45_027608	-1.21549	3.68e-111	GMPP1_ARATH	CYT1	hypothetical protein && sp|O22287|GMPP1_ARATH Mannose-1-phosphate guanylyltransferase 1 OS=Arabidopsis thaliana OX=3702 GN=CYT1 PE=1 SV=1 && PF00483:Nucleotidyl transferase|PF09229:Activator of Hsp90 ATPase, N-terminal
gene_QJQ45_010671	-1.69657	5.12e-110	DTC_ARATH	DTC	hypothetical protein && sp|Q9C5M0|DTC_ARATH Mitochondrial dicarboxylate/tricarboxylate transporter DTC OS=Arabidopsis thaliana OX=3702 GN=DTC PE=1 SV=1 && PF00153:Mitochondrial carrier protein
gene_QJQ45_014221	1.38541	5.45e-110	YEGS_PSEAB	PA14_24970	hypothetical protein && sp|Q02PI7|YEGS_PSEAB Probable lipid kinase YegS-like OS=Pseudomonas aeruginosa (strain UCBPP-PA14) OX=208963 GN=PA14_24970 PE=3 SV=1 && PF00781:Diacylglycerol kinase catalytic domain
gene_QJQ45_008931	-1.30911	5.13e-109	RCA_CHLRE	#N/A	hypothetical protein && sp|P23489|RCA_CHLRE Ribulose bisphosphate carboxylase/oxygenase activase, chloroplastic OS=Chlamydomonas reinhardtii OX=3055 PE=2 SV=1 && PF21228:Ribulose bisphosphate carboxylase/oxygenase activase, AAA, helical|PF00004:ATPase family associated with various cellular activities (AAA)
gene_QJQ45_014392	-1.25711	1.46e-107	GLNA1_CHLRE	GLN1	hypothetical protein && sp|Q42688|GLNA1_CHLRE Glutamine synthetase cytosolic isozyme OS=Chlamydomonas reinhardtii OX=3055 GN=GLN1 PE=2 SV=1 && PF00120:Glutamine synthetase, catalytic domain
gene_QJQ45_002013	4.34419	1.95e-107	GS39_BACSU	ydaD	hypothetical protein && sp|P80873|GS39_BACSU General stress protein 39 OS=Bacillus subtilis (strain 168) OX=224308 GN=ydaD PE=1 SV=3 && PF00106:short chain dehydrogenase
gene_QJQ45_006121	-1.83041	2.18e-106	PCKA2_ARATH	PCK2	hypothetical protein && sp|B5X574|PCKA2_ARATH Phosphoenolpyruvate carboxykinase (ATP) 2 OS=Arabidopsis thaliana OX=3702 GN=PCK2 PE=1 SV=1 && PF01293:Phosphoenolpyruvate carboxykinase
gene_QJQ45_021724	-1.03041	1.07e-105	CB2_CHLRE	cabII-1	hypothetical protein && sp|P14273|CB2_CHLRE Chlorophyll a-b binding protein of LHCII type I, chloroplastic OS=Chlamydomonas reinhardtii OX=3055 GN=cabII-1 PE=3 SV=1 && PF00504:Chlorophyll A-B binding protein
gene_QJQ45_027502	-1.73583	7.23e-105	CAO_CHLRE	CAO	hypothetical protein && sp|Q9ZWM5|CAO_CHLRE Chlorophyllide a oxygenase, chloroplastic OS=Chlamydomonas reinhardtii OX=3055 GN=CAO PE=2 SV=2 && PF00355:Rieske [2Fe-2S] domain|PF08417:Pheophorbide a oxygenase
gene_QJQ45_001143	-1.04945	8.06e-105	PSBR_CHLRE	PSBR	hypothetical protein && sp|A0A2K3DMP5|PSBR_CHLRE Photosystem II protein PSBR, chloroplastic OS=Chlamydomonas reinhardtii OX=3055 GN=PSBR PE=1 SV=1 && PF04725:Photosystem II 10 kDa polypeptide PsbR
gene_QJQ45_017973	-1.23654	2.3e-103	TKTC1_ARATH	TKL-1	hypothetical protein && sp|Q8RWV0|TKTC1_ARATH Transketolase-1, chloroplastic OS=Arabidopsis thaliana OX=3702 GN=TKL-1 PE=1 SV=1 && PF02780:Transketolase, C-terminal domain|PF00456:Transketolase, thiamine diphosphate binding domain|PF02779:Transketolase, pyrimidine binding domain
gene_QJQ45_015983	1.55844	1.47e-101	MRP4_HUMAN	ABCC4	hypothetical protein && sp|O15439|MRP4_HUMAN ATP-binding cassette sub-family C member 4 OS=Homo sapiens OX=9606 GN=ABCC4 PE=1 SV=3 && PF00005:ABC transporter|PF00664:ABC transporter transmembrane region
gene_QJQ45_028210	3.28046	3.42e-101	RDH11_MOUSE	Rdh11	hypothetical protein && sp|Q9QYF1|RDH11_MOUSE Retinol dehydrogenase 11 OS=Mus musculus OX=10090 GN=Rdh11 PE=1 SV=2 && PF00106:short chain dehydrogenase
gene_QJQ45_021896	-1.04109	5.07e-101	RMLCD_ARATH	NRS/ER	hypothetical protein && sp|Q9LQ04|RMLCD_ARATH Bifunctional dTDP-4-dehydrorhamnose 3,5-epimerase/dTDP-4-dehydrorhamnose reductase OS=Arabidopsis thaliana OX=3702 GN=NRS/ER PE=1 SV=1 && PF00101:Ribulose bisphosphate carboxylase, small chain|PF01370:NAD dependent epimerase/dehydratase family|PF00447:HSF-type DNA-binding
gene_QJQ45_025646	1.6986	6.99e-100	PLIP1_ARATH	PLIP1	hypothetical protein && sp|Q7Y220|PLIP1_ARATH Phospholipase A1 PLIP1, chloroplastic OS=Arabidopsis thaliana OX=3702 GN=PLIP1 PE=1 SV=1 && PF01764:Lipase (class 3)
gene_QJQ45_014295	1.90881	4.05e-99	RDH11_MOUSE	Rdh11	hypothetical protein && sp|Q9QYF1|RDH11_MOUSE Retinol dehydrogenase 11 OS=Mus musculus OX=10090 GN=Rdh11 PE=1 SV=2 && PF00106:short chain dehydrogenase
gene_QJQ45_021379	-1.30497	6.58e-99	P4H9_ARATH	P4H9	hypothetical protein && sp|Q8VZJ7|P4H9_ARATH Probable prolyl 4-hydroxylase 9 OS=Arabidopsis thaliana OX=3702 GN=P4H9 PE=2 SV=1 && PF13640:2OG-Fe(II) oxygenase superfamily
gene_QJQ45_016188	1.85286	7.25e-99	BGL07_ORYSJ	BGLU7	hypothetical protein && sp|Q75I93|BGL07_ORYSJ Beta-glucosidase 7 OS=Oryza sativa subsp. japonica OX=39947 GN=BGLU7 PE=1 SV=1 && PF00232:Glycosyl hydrolase family 1
gene_QJQ45_014831	2.19287	2.5e-98	PXG1_AVESA	#N/A	hypothetical protein && sp|G1JSL4|PXG1_AVESA Peroxygenase 1 OS=Avena sativa OX=4498 PE=1 SV=1 && PF05042:Caleosin related protein
gene_QJQ45_005246	-1.39668	3.3e-98	CB5_ARATH	LHCB5	hypothetical protein && sp|Q9XF89|CB5_ARATH Chlorophyll a-b binding protein CP26, chloroplastic OS=Arabidopsis thaliana OX=3702 GN=LHCB5 PE=1 SV=1 && PF00504:Chlorophyll A-B binding protein
gene_QJQ45_004471	-1.55153	3.73e-97	CB2_CHLMO	#N/A	hypothetical protein && sp|P22686|CB2_CHLMO Chlorophyll a-b binding protein of LHCII type I, chloroplastic OS=Chlamydomonas moewusii OX=3054 PE=2 SV=1 && PF00504:Chlorophyll A-B binding protein
gene_QJQ45_022191	-1.07622	8.83e-96	CB12_SOLLC	CAB7	hypothetical protein && sp|P10708|CB12_SOLLC Chlorophyll a-b binding protein 7, chloroplastic OS=Solanum lycopersicum OX=4081 GN=CAB7 PE=3 SV=1 && PF00504:Chlorophyll A-B binding protein
gene_QJQ45_015582	-1.32434	1.12e-95	S17P_CHLRE	CSBP	hypothetical protein && sp|P46284|S17P_CHLRE Sedoheptulose-1,7-bisphosphatase, chloroplastic OS=Chlamydomonas reinhardtii OX=3055 GN=CSBP PE=2 SV=1 && PF18913:Fructose-1-6-bisphosphatase, C-terminal domain|PF00316:Fructose-1-6-bisphosphatase, N-terminal domain|PF00288:GHMP kinases N terminal domain|PF00364:Biotin-requiring enzyme|PF06026:Ribose 5-phosphate isomerase A (phosphoriboisomerase A)
gene_QJQ45_029339	-1.2249	2.36e-95	COPIA_DROME	GIP	hypothetical protein && sp|P04146|COPIA_DROME Copia protein OS=Drosophila melanogaster OX=7227 GN=GIP PE=1 SV=3 && PF00665:Integrase core domain
gene_QJQ45_027041	-1.56246	8.84e-95	DCUP2_ARATH	HEME2	hypothetical protein && sp|O22886|DCUP2_ARATH Uroporphyrinogen decarboxylase 2, chloroplastic OS=Arabidopsis thaliana OX=3702 GN=HEME2 PE=2 SV=1 && PF01208:Uroporphyrinogen decarboxylase (URO-D)
gene_QJQ45_023066	-1.20719	1.29e-94	MANA2_ARATH	At5g13980	hypothetical protein && sp|Q8LPJ3|MANA2_ARATH Probable alpha-mannosidase At5g13980 OS=Arabidopsis thaliana OX=3702 GN=At5g13980 PE=2 SV=1 && -
gene_QJQ45_018727	-1.52711	1.43e-94	LHCA5_ARATH	LHCA5	hypothetical protein && sp|Q9C639|LHCA5_ARATH Photosystem I chlorophyll a/b-binding protein 5, chloroplastic OS=Arabidopsis thaliana OX=3702 GN=LHCA5 PE=1 SV=1 && PF00504:Chlorophyll A-B binding protein
gene_QJQ45_022301	2.10762	2.38e-94	AB25B_ARATH	ABCB25	hypothetical protein && sp|Q9LVM1|AB25B_ARATH ABC transporter B family member 25, mitochondrial OS=Arabidopsis thaliana OX=3702 GN=ABCB25 PE=1 SV=1 && PF00664:ABC transporter transmembrane region|PF00005:ABC transporter
gene_QJQ45_012395	-1.27185	1.48e-93	FADX_IMPBA	FADX	hypothetical protein && sp|Q9SP62|FADX_IMPBA Delta(12) acyl-lipid conjugase (11E,13E-forming) OS=Impatiens balsamina OX=63779 GN=FADX PE=1 SV=1 && PF00078:Reverse transcriptase (RNA-dependent DNA polymerase)
gene_QJQ45_029099	1.5433	6.52e-93	ACOX2_ARATH	ACX2	hypothetical protein && sp|O65201|ACOX2_ARATH Acyl-coenzyme A oxidase 2, peroxisomal OS=Arabidopsis thaliana OX=3702 GN=ACX2 PE=1 SV=2 && PF01756:Acyl-CoA oxidase|PF00441:Acyl-CoA dehydrogenase, C-terminal domain|PF02770:Acyl-CoA dehydrogenase, middle domain
gene_QJQ45_017904	-1.7424	1.66e-92	MANA2_ARATH	At5g13980	hypothetical protein && sp|Q8LPJ3|MANA2_ARATH Probable alpha-mannosidase At5g13980 OS=Arabidopsis thaliana OX=3702 GN=At5g13980 PE=2 SV=1 && PF01074:Glycosyl hydrolases family 38 N-terminal domain
gene_QJQ45_017514	2.48267	1.98e-92	RDH11_HUMAN	RDH11	hypothetical protein && sp|Q8TC12|RDH11_HUMAN Retinol dehydrogenase 11 OS=Homo sapiens OX=9606 GN=RDH11 PE=1 SV=2 && PF00106:short chain dehydrogenase
gene_QJQ45_017220	-1.07729	7.24e-92	GLGS1_VICFA	AGPC	hypothetical protein && sp|P52416|GLGS1_VICFA Glucose-1-phosphate adenylyltransferase small subunit 1, chloroplastic OS=Vicia faba OX=3906 GN=AGPC PE=2 SV=1 && PF00483:Nucleotidyl transferase
gene_QJQ45_012085	-1.39012	6.11e-91	ALFC_CHLRE	ALDCHL	hypothetical protein && sp|Q42690|ALFC_CHLRE Fructose-bisphosphate aldolase 1, chloroplastic OS=Chlamydomonas reinhardtii OX=3055 GN=ALDCHL PE=2 SV=2 && PF00274:Fructose-bisphosphate aldolase class-I
gene_QJQ45_018047	-3.2326	8.68e-91	PGKH_VOLCA	PGK	hypothetical protein && sp|Q9SBN4|PGKH_VOLCA Phosphoglycerate kinase, chloroplastic OS=Volvox carteri OX=3067 GN=PGK PE=2 SV=1 && PF00162:Phosphoglycerate kinase
gene_QJQ45_015501	1.53967	1.38e-90	UGE5_ARATH	UGE5	hypothetical protein && sp|Q9SN58|UGE5_ARATH UDP-glucose 4-epimerase 5 OS=Arabidopsis thaliana OX=3702 GN=UGE5 PE=1 SV=3 && PF16363:GDP-mannose 4,6 dehydratase|PF00251:Glycosyl hydrolases family 32 N-terminal domain
gene_QJQ45_025444	2.07172	1.42e-89	P2C60_ARATH	At4g31860	hypothetical protein && sp|Q9SZ53|P2C60_ARATH Probable protein phosphatase 2C 60 OS=Arabidopsis thaliana OX=3702 GN=At4g31860 PE=2 SV=1 && PF00481:Protein phosphatase 2C
novel.8459	3.6466	2.84e-89	GS39_BACSU	ydaD	- && sp|P80873|GS39_BACSU General stress protein 39 OS=Bacillus subtilis (strain 168) OX=224308 GN=ydaD PE=1 SV=3 && -
gene_QJQ45_024825	-1.30258	6.73e-89	RCA_CHLRE	#N/A	hypothetical protein && sp|P23489|RCA_CHLRE Ribulose bisphosphate carboxylase/oxygenase activase, chloroplastic OS=Chlamydomonas reinhardtii OX=3055 PE=2 SV=1 && PF21228:Ribulose bisphosphate carboxylase/oxygenase activase, AAA, helical
gene_QJQ45_007934	-1.45216	3.61e-88	GLNA2_CHLRE	GLN2	hypothetical protein && sp|Q42689|GLNA2_CHLRE Glutamine synthetase, chloroplastic OS=Chlamydomonas reinhardtii OX=3055 GN=GLN2 PE=2 SV=1 && PF00120:Glutamine synthetase, catalytic domain
gene_QJQ45_016835	1.91013	4.97e-88	LHSR1_CHLRE	LHCSR1	hypothetical protein && sp|P93664|LHSR1_CHLRE Light-harvesting complex stress-related protein 1, chloroplastic OS=Chlamydomonas reinhardtii OX=3055 GN=LHCSR1 PE=1 SV=1 && PF00504:Chlorophyll A-B binding protein
gene_QJQ45_003346	-1.27388	6.69e-88	KCS5_ARATH	KCS5	hypothetical protein && sp|Q9C6L5|KCS5_ARATH 3-ketoacyl-CoA synthase 5 OS=Arabidopsis thaliana OX=3702 GN=KCS5 PE=2 SV=1 && PF08392:FAE1/Type III polyketide synthase-like protein
gene_QJQ45_014104	2.0848	2.83e-87	GSHRP_ARATH	EMB2360	hypothetical protein && sp|P42770|GSHRP_ARATH Glutathione reductase, chloroplastic OS=Arabidopsis thaliana OX=3702 GN=EMB2360 PE=2 SV=1 && PF07992:Pyridine nucleotide-disulphide oxidoreductase|PF00070:Pyridine nucleotide-disulphide oxidoreductase
gene_QJQ45_020405	1.06262	1.66e-86	YEGS_PSEAB	PA14_24970	hypothetical protein && sp|Q02PI7|YEGS_PSEAB Probable lipid kinase YegS-like OS=Pseudomonas aeruginosa (strain UCBPP-PA14) OX=208963 GN=PA14_24970 PE=3 SV=1 && PF00781:Diacylglycerol kinase catalytic domain
gene_QJQ45_019195	1.49819	4.02e-85	UCRIB_CYAPA	#N/A	hypothetical protein && sp|Q5CC92|UCRIB_CYAPA Cytochrome b6-f complex iron-sulfur subunit 2, cyanelle OS=Cyanophora paradoxa OX=2762 GN=petC-2 PE=2 SV=1 && PF01266:FAD dependent oxidoreductase
gene_QJQ45_015548	1.27078	6.05e-85	INO1_TOBAC	#N/A	hypothetical protein && sp|Q9LW96|INO1_TOBAC Inositol-3-phosphate synthase OS=Nicotiana tabacum OX=4097 PE=2 SV=1 && PF07994:Myo-inositol-1-phosphate synthase|PF01658:Myo-inositol-1-phosphate synthase
gene_QJQ45_025442	1.56569	7.66e-85	PVH1_YEAST	YVH1	hypothetical protein && sp|Q02256|PVH1_YEAST Tyrosine-protein phosphatase YVH1 OS=Saccharomyces cerevisiae (strain ATCC 204508 / S288c) OX=559292 GN=YVH1 PE=1 SV=1 && PF05699:hAT family C-terminal dimerisation region|PF00702:haloacid dehalogenase-like hydrolase|PF00782:Dual specificity phosphatase, catalytic domain
gene_QJQ45_021566	1.61456	9.77e-85	UCRIB_CYAPA	#N/A	hypothetical protein && sp|Q5CC92|UCRIB_CYAPA Cytochrome b6-f complex iron-sulfur subunit 2, cyanelle OS=Cyanophora paradoxa OX=2762 GN=petC-2 PE=2 SV=1 && PF01266:FAD dependent oxidoreductase
gene_QJQ45_023077	1.82864	1.88e-84	CTPA3_ARATH	CTPA3	hypothetical protein && sp|F4J3G5|CTPA3_ARATH Carboxyl-terminal-processing peptidase 3, chloroplastic OS=Arabidopsis thaliana OX=3702 GN=CTPA3 PE=3 SV=1 && PF17820:PDZ domain|PF03572:Peptidase family S41
gene_QJQ45_006802	-3.05726	3.01e-84	NAT3_ARATH	NAT3	hypothetical protein && sp|Q8GZD4|NAT3_ARATH Nucleobase-ascorbate transporter 3 OS=Arabidopsis thaliana OX=3702 GN=NAT3 PE=2 SV=2 && PF00860:Permease family
gene_QJQ45_026620	-1.63783	9.57e-84	DCUP2_ARATH	HEME2	hypothetical protein && sp|O22886|DCUP2_ARATH Uroporphyrinogen decarboxylase 2, chloroplastic OS=Arabidopsis thaliana OX=3702 GN=HEME2 PE=2 SV=1 && PF01208:Uroporphyrinogen decarboxylase (URO-D)
gene_QJQ45_026287	1.43503	1.94e-81	DNAI4_XENLA	dnai4	hypothetical protein && sp|Q6GPB9|DNAI4_XENLA Dynein axonemal intermediate chain 4 OS=Xenopus laevis OX=8355 GN=dnai4 PE=2 SV=1 && -
gene_QJQ45_029448	-1.58868	1.16e-80	BAS1B_ARATH	At5g06290	hypothetical protein && sp|Q9C5R8|BAS1B_ARATH 2-Cys peroxiredoxin BAS1-like, chloroplastic OS=Arabidopsis thaliana OX=3702 GN=At5g06290 PE=2 SV=3 && PF00578:AhpC/TSA family
gene_QJQ45_024304	-1.58364	2.49e-80	FTHS_SPIOL	#N/A	hypothetical protein && sp|P28723|FTHS_SPIOL Formate--tetrahydrofolate ligase OS=Spinacia oleracea OX=3562 PE=1 SV=3 && PF01268:Formate--tetrahydrofolate ligase
gene_QJQ45_015524	3.01684	3.47e-80	U80A2_ARATH	UGT80A2	hypothetical protein && sp|Q9M8Z7|U80A2_ARATH Sterol 3-beta-glucosyltransferase UGT80A2 OS=Arabidopsis thaliana OX=3702 GN=UGT80A2 PE=1 SV=1 && PF03033:Glycosyltransferase family 28 N-terminal domain|PF06722:Erythromycin biosynthesis protein CIII-like, C-terminal domain
gene_QJQ45_012243	-3.55843	4.62e-80	HEM3_PEA	HEMC	hypothetical protein && sp|Q43082|HEM3_PEA Porphobilinogen deaminase, chloroplastic OS=Pisum sativum OX=3888 GN=HEMC PE=1 SV=1 && PF03900:Porphobilinogen deaminase, C-terminal domain|PF01379:Porphobilinogen deaminase, dipyromethane cofactor binding domain
gene_QJQ45_015218	5.30301	2.13e-79	CAH1_CHLRE	CAH1	hypothetical protein && sp|P20507|CAH1_CHLRE Carbonic anhydrase 1 OS=Chlamydomonas reinhardtii OX=3055 GN=CAH1 PE=1 SV=1 && PF00194:Eukaryotic-type carbonic anhydrase
gene_QJQ45_014385	-1.05546	3.64e-79	LACS4_ARATH	LACS4	hypothetical protein && sp|Q9T0A0|LACS4_ARATH Long chain acyl-CoA synthetase 4 OS=Arabidopsis thaliana OX=3702 GN=LACS4 PE=2 SV=1 && PF00501:AMP-binding enzyme
gene_QJQ45_000095	-1.44917	4.69e-79	GLNA2_CHLRE	GLN2	hypothetical protein && sp|Q42689|GLNA2_CHLRE Glutamine synthetase, chloroplastic OS=Chlamydomonas reinhardtii OX=3055 GN=GLN2 PE=2 SV=1 && PF00120:Glutamine synthetase, catalytic domain
gene_QJQ45_013157	-1.85881	3.51e-78	CHLI_CHLRE	CHLI	hypothetical protein && sp|Q94FT3|CHLI_CHLRE Magnesium-chelatase subunit ChlI, chloroplastic OS=Chlamydomonas reinhardtii OX=3055 GN=CHLI PE=2 SV=1 && PF17863:AAA lid domain
gene_QJQ45_020589	-1.33638	5.59e-78	IPL1_ASHGO	#N/A	hypothetical protein && sp|Q755C4|IPL1_ASHGO Spindle assembly checkpoint kinase OS=Ashbya gossypii (strain ATCC 10895 / CBS 109.51 / FGSC 9923 / NRRL Y-1056) OX=284811 GN=IPL1 PE=3 SV=1 && PF00069:Protein kinase domain
gene_QJQ45_016559	2.13557	6.66e-78	DRKC_DICDI	drkC	hypothetical protein && sp|Q54TA1|DRKC_DICDI Probable serine/threonine-protein kinase drkC OS=Dictyostelium discoideum OX=44689 GN=drkC PE=3 SV=1 && PF00069:Protein kinase domain
gene_QJQ45_016420	1.13788	7.5e-78	CLPX3_ARATH	#N/A	hypothetical protein && sp|Q66GN9|CLPX3_ARATH CLP protease regulatory subunit CLPX3, mitochondrial OS=Arabidopsis thaliana OX=3702 GN=CLPX3 PE=2 SV=1 && PF07724:AAA domain (Cdc48 subfamily)
gene_QJQ45_028188	1.96302	7.67e-78	DHRSX_MOUSE	Dhrsx	hypothetical protein && sp|Q8VBZ0|DHRSX_MOUSE Dehydrogenase/reductase SDR family member on chromosome X homolog OS=Mus musculus OX=10090 GN=Dhrsx PE=1 SV=2 && PF00106:short chain dehydrogenase
gene_QJQ45_016457	-1.85984	1.07e-77	CB29_CHLRE	Lhcb4	hypothetical protein && sp|Q93WD2|CB29_CHLRE Chlorophyll a-b binding protein CP29 OS=Chlamydomonas reinhardtii OX=3055 GN=Lhcb4 PE=1 SV=3 && PF00085:Thioredoxin|PF00504:Chlorophyll A-B binding protein
gene_QJQ45_018245	1.9806	1.15e-77	UVSE_BACVZ	uvsE	hypothetical protein && sp|A7Z9T8|UVSE_BACVZ UV DNA damage endonuclease OS=Bacillus velezensis (strain DSM 23117 / BGSC 10A6 / FZB42) OX=326423 GN=uvsE PE=3 SV=1 && PF00075:RNase H|PF03851:UV-endonuclease UvdE
gene_QJQ45_022073	-1.2535	1.21e-77	GLPX_CORGL	glpX	hypothetical protein && sp|Q6M6E7|GLPX_CORGL Fructose-1,6-bisphosphatase class 2 OS=Corynebacterium glutamicum (strain ATCC 13032 / DSM 20300 / BCRC 11384 / JCM 1318 / LMG 3730 / NCIMB 10025) OX=196627 GN=glpX PE=1 SV=1 && PF09793:Anticodon-binding domain|PF03320:Bacterial fructose-1,6-bisphosphatase, glpX-encoded
gene_QJQ45_022439	1.39768	1.96e-77	FTSH1_ORYSJ	FTSH1	hypothetical protein && sp|Q5Z974|FTSH1_ORYSJ ATP-dependent zinc metalloprotease FTSH 1, chloroplastic OS=Oryza sativa subsp. japonica OX=39947 GN=FTSH1 PE=2 SV=1 && PF00004:ATPase family associated with various cellular activities (AAA)|PF01434:Peptidase family M41|PF17862:AAA+ lid domain
gene_QJQ45_012928	-2.04139	2.43e-77	CHLD_TOBAC	CHLD	hypothetical protein && sp|O24133|CHLD_TOBAC Magnesium-chelatase subunit ChlD, chloroplastic OS=Nicotiana tabacum OX=4097 GN=CHLD PE=2 SV=1 && PF17863:AAA lid domain|PF13519:von Willebrand factor type A domain
gene_QJQ45_016484	1.05773	2.85e-77	AB9G_ARATH	ABCG9	hypothetical protein && sp|Q9SZR9|AB9G_ARATH ABC transporter G family member 9 OS=Arabidopsis thaliana OX=3702 GN=ABCG9 PE=1 SV=2 && PF00005:ABC transporter|PF01061:ABC-2 type transporter
novel.8182	2.0935	1.28e-75	LFG1_BOVIN	#N/A	- && sp|Q32L53|LFG1_BOVIN Protein lifeguard 1 OS=Bos taurus OX=9913 GN=GRINA PE=2 SV=1 && -
gene_QJQ45_017434	1.38441	3.29e-75	CP4C1_BLADI	CYP4C1	hypothetical protein && sp|P29981|CP4C1_BLADI Cytochrome P450 4C1 OS=Blaberus discoidalis OX=6981 GN=CYP4C1 PE=2 SV=1 && PF00067:Cytochrome P450
gene_QJQ45_026244	-1.76709	1.27e-74	LHCA5_ARATH	LHCA5	hypothetical protein && sp|Q9C639|LHCA5_ARATH Photosystem I chlorophyll a/b-binding protein 5, chloroplastic OS=Arabidopsis thaliana OX=3702 GN=LHCA5 PE=1 SV=1 && PF00504:Chlorophyll A-B binding protein
gene_QJQ45_022207	-1.30187	1.45e-74	GLNA1_CHLRE	GLN1	hypothetical protein && sp|Q42688|GLNA1_CHLRE Glutamine synthetase cytosolic isozyme OS=Chlamydomonas reinhardtii OX=3055 GN=GLN1 PE=2 SV=1 && PF00120:Glutamine synthetase, catalytic domain
gene_QJQ45_021485	-1.10015	4.56e-74	FABG_CUPLA	CLKR27	hypothetical protein && sp|P28643|FABG_CUPLA 3-oxoacyl-[acyl-carrier-protein] reductase, chloroplastic OS=Cuphea lanceolata OX=3930 GN=CLKR27 PE=2 SV=1 && PF00106:short chain dehydrogenase|PF13561:Enoyl-(Acyl carrier protein) reductase|PF06423:GWT1
gene_QJQ45_027906	1.51304	7.66e-74	INO1_TOBAC	#N/A	hypothetical protein && sp|Q9LW96|INO1_TOBAC Inositol-3-phosphate synthase OS=Nicotiana tabacum OX=4097 PE=2 SV=1 && PF07994:Myo-inositol-1-phosphate synthase|PF01658:Myo-inositol-1-phosphate synthase
gene_QJQ45_004915	3.30658	2.56e-73	PSBS1_CHLRE	PSBS1	hypothetical protein && sp|A8HPM2|PSBS1_CHLRE Photosystem II protein PSBS1 OS=Chlamydomonas reinhardtii OX=3055 GN=PSBS1 PE=1 SV=1 && -
gene_QJQ45_015099	-1.55777	1.15e-72	LCYE_SOLLC	CRTL-E-1	hypothetical protein && sp|O65837|LCYE_SOLLC Lycopene epsilon cyclase, chloroplastic OS=Solanum lycopersicum OX=4081 GN=CRTL-E-1 PE=2 SV=1 && PF05834:Lycopene cyclase protein
novel.3700	-1.4239	1.74e-72	MMSA_ARATH	ALDH6B2	- && sp|Q0WM29|MMSA_ARATH Methylmalonate-semialdehyde dehydrogenase [acylating], mitochondrial OS=Arabidopsis thaliana OX=3702 GN=ALDH6B2 PE=1 SV=2 && PF00171:Aldehyde dehydrogenase family
novel.4475	2.14268	2.92e-72	DPOLM_HUMAN	POLM	- && sp|Q9NP87|DPOLM_HUMAN DNA-directed DNA/RNA polymerase mu OS=Homo sapiens OX=9606 GN=POLM PE=1 SV=1 && -
gene_QJQ45_018269	2.02259	8.11e-72	PHO89_YEAST	PHO89	hypothetical protein && sp|P38361|PHO89_YEAST Phosphate permease PHO89 OS=Saccharomyces cerevisiae (strain ATCC 204508 / S288c) OX=559292 GN=PHO89 PE=1 SV=1 && PF01384:Phosphate transporter family
gene_QJQ45_016015	1.10851	1.26e-71	PUR5_VIGUN	PUR5	hypothetical protein && sp|P52424|PUR5_VIGUN Phosphoribosylformylglycinamidine cyclo-ligase, chloroplastic/mitochondrial OS=Vigna unguiculata OX=3917 GN=PUR5 PE=2 SV=1 && PF00586:AIR synthase related protein, N-terminal domain|PF02769:AIR synthase related protein, C-terminal domain
gene_QJQ45_007866	-1.18768	1.38e-71	DES6_CERPU	#N/A	hypothetical protein && sp|Q9LEM9|DES6_CERPU Acyl-lipid (9-3)-desaturase OS=Ceratodon purpureus OX=3225 PE=1 SV=1 && PF00173:Cytochrome b5-like Heme/Steroid binding domain|PF00487:Fatty acid desaturase
gene_QJQ45_015016	5.83402	1.94e-71	PSBS1_ORYSI	PSBS1	hypothetical protein && sp|A2WXD9|PSBS1_ORYSI Photosystem II 22 kDa protein 1, chloroplastic OS=Oryza sativa subsp. indica OX=39946 GN=PSBS1 PE=1 SV=1 && -
gene_QJQ45_024550	-1.16268	8.16e-71	FER_CHLRE	PETF	hypothetical protein && sp|P07839|FER_CHLRE Ferredoxin, chloroplastic OS=Chlamydomonas reinhardtii OX=3055 GN=PETF PE=1 SV=2 && PF00111:2Fe-2S iron-sulfur cluster binding domain
gene_QJQ45_013772	-2.33904	2.9e-70	G3PA_CHLRE	GAPA	hypothetical protein && sp|P50362|G3PA_CHLRE Glyceraldehyde-3-phosphate dehydrogenase A, chloroplastic OS=Chlamydomonas reinhardtii OX=3055 GN=GAPA PE=1 SV=1 && PF00044:Glyceraldehyde 3-phosphate dehydrogenase, NAD binding domain|PF02800:Glyceraldehyde 3-phosphate dehydrogenase, C-terminal domain
gene_QJQ45_022315	1.38601	1.86e-69	BASS1_ORYSJ	BASS1	hypothetical protein && sp|Q7XVB3|BASS1_ORYSJ Probable sodium/metabolite cotransporter BASS1, chloroplastic OS=Oryza sativa subsp. japonica OX=39947 GN=BASS1 PE=2 SV=2 && PF01758:Sodium Bile acid symporter family|PF07714:Protein tyrosine and serine/threonine kinase
novel.7402	3.63498	3.84e-69	SOQ1_ARATH	SOQ1	- && sp|Q8VZ10|SOQ1_ARATH Protein SUPPRESSOR OF QUENCHING 1, chloroplastic OS=Arabidopsis thaliana OX=3702 GN=SOQ1 PE=1 SV=1 && -
gene_QJQ45_024039	-1.23783	9.92e-69	PSAF_CHLRE	PSAF	hypothetical protein && sp|P12356|PSAF_CHLRE Photosystem I reaction center subunit III, chloroplastic OS=Chlamydomonas reinhardtii OX=3055 GN=PSAF PE=1 SV=1 && PF02507:Photosystem I reaction centre subunit III
gene_QJQ45_006554	1.09865	1.56e-68	YI31B_YEAST	TY3B-I	hypothetical protein && sp|Q7LHG5|YI31B_YEAST Transposon Ty3-I Gag-Pol polyprotein OS=Saccharomyces cerevisiae (strain ATCC 204508 / S288c) OX=559292 GN=TY3B-I PE=1 SV=2 && PF17919:RNase H-like domain found in reverse transcriptase|PF19259:Ty3 transposon capsid-like protein|PF00078:Reverse transcriptase (RNA-dependent DNA polymerase)|PF07724:AAA domain (Cdc48 subfamily)|PF17921:Integrase zinc bin…
gene_QJQ45_028470	-1.4847	2.06e-67	BAC2_ARATH	BAC2	hypothetical protein && sp|Q9CA93|BAC2_ARATH Mitochondrial arginine transporter BAC2 OS=Arabidopsis thaliana OX=3702 GN=BAC2 PE=1 SV=1 && PF00153:Mitochondrial carrier protein
gene_QJQ45_013927	1.10538	2.36e-67	ABCC3_DICDI	abcC3	hypothetical protein && sp|Q54JR2|ABCC3_DICDI ABC transporter C family member 3 OS=Dictyostelium discoideum OX=44689 GN=abcC3 PE=3 SV=1 && PF00005:ABC transporter|PF00664:ABC transporter transmembrane region
gene_QJQ45_006038	-1.47448	3.21e-67	RCA_CHLRE	#N/A	hypothetical protein && sp|P23489|RCA_CHLRE Ribulose bisphosphate carboxylase/oxygenase activase, chloroplastic OS=Chlamydomonas reinhardtii OX=3055 PE=2 SV=1 && PF21228:Ribulose bisphosphate carboxylase/oxygenase activase, AAA, helical|PF00004:ATPase family associated with various cellular activities (AAA)
gene_QJQ45_007848	4.34441	4.61e-67	COPIA_DROME	GIP	hypothetical protein && sp|P04146|COPIA_DROME Copia protein OS=Drosophila melanogaster OX=7227 GN=GIP PE=1 SV=3 && PF00665:Integrase core domain|PF14223:gag-polypeptide of LTR copia-type
gene_QJQ45_001328	2.31673	1.06e-66	WDR76_XENLA	wdr76	hypothetical protein && sp|Q4KLQ5|WDR76_XENLA WD repeat-containing protein 76 OS=Xenopus laevis OX=8355 GN=wdr76 PE=2 SV=1 && -
gene_QJQ45_020312	-3.98837	2.31e-66	FMDA_METME	fmdA	hypothetical protein && sp|Q50228|FMDA_METME Formamidase OS=Methylophilus methylotrophus OX=17 GN=fmdA PE=1 SV=1 && PF03069:Acetamidase/Formamidase family
gene_QJQ45_017929	-2.00957	2.62e-66	MTP10_ARATH	MTP10	hypothetical protein && sp|Q0WU02|MTP10_ARATH Metal tolerance protein 10 OS=Arabidopsis thaliana OX=3702 GN=MTP10 PE=2 SV=1 && PF01545:Cation efflux family
gene_QJQ45_014390	1.41638	1.02e-65	MENG_DEIRA	#N/A	hypothetical protein && sp|Q9RRT0|MENG_DEIRA Demethylmenaquinone methyltransferase OS=Deinococcus radiodurans (strain ATCC 13939 / DSM 20539 / JCM 16871 / LMG 4051 / NBRC 15346 / NCIMB 9279 / R1 / VKM B-1422) OX=243230 GN=menG PE=3 SV=1 && PF08241:Methyltransferase domain
gene_QJQ45_024983	-2.9959	7.37e-65	HS16A_WHEAT	hsp16.9A	hypothetical protein && sp|P12810|HS16A_WHEAT 16.9 kDa class I heat shock protein 1 OS=Triticum aestivum OX=4565 GN=hsp16.9A PE=2 SV=1 && PF00011:Hsp20/alpha crystallin family
gene_QJQ45_029416	1.78006	1e-64	FADH_METMR	fdh	hypothetical protein && sp|P47734|FADH_METMR S-(hydroxymethyl)glutathione dehydrogenase OS=Methylobacter marinus OX=34058 GN=fdh PE=3 SV=2 && PF08240:Alcohol dehydrogenase GroES-like domain
gene_QJQ45_028079	1.20492	1.6e-64	GWD1_CITRE	R1	hypothetical protein && sp|Q8LPT9|GWD1_CITRE Alpha-glucan water dikinase, chloroplastic OS=Citrus reticulata OX=85571 GN=R1 PE=2 SV=1 && -
gene_QJQ45_017788	1.63868	1.86e-64	PLIP1_ARATH	PLIP1	hypothetical protein && sp|Q7Y220|PLIP1_ARATH Phospholipase A1 PLIP1, chloroplastic OS=Arabidopsis thaliana OX=3702 GN=PLIP1 PE=1 SV=1 && PF01764:Lipase (class 3)
gene_QJQ45_025095	-1.32192	1.29e-63	PSAE_CHLRE	PSAE	hypothetical protein && sp|P12352|PSAE_CHLRE Photosystem I reaction center subunit IV, chloroplastic OS=Chlamydomonas reinhardtii OX=3055 GN=PSAE PE=1 SV=1 && PF02427:Photosystem I reaction centre subunit IV / PsaE
gene_QJQ45_011407	-1.69854	2.32e-63	RPI3_ARATH	RPI3	hypothetical protein && sp|Q9S726|RPI3_ARATH Probable ribose-5-phosphate isomerase 3, chloroplastic OS=Arabidopsis thaliana OX=3702 GN=RPI3 PE=1 SV=1 && PF06026:Ribose 5-phosphate isomerase A (phosphoriboisomerase A)
gene_QJQ45_022372	1.37514	2.6e-63	DEAH4_ARATH	At1g27900	hypothetical protein && sp|Q93Y16|DEAH4_ARATH Probable pre-mRNA-splicing factor ATP-dependent RNA helicase DEAH4 OS=Arabidopsis thaliana OX=3702 GN=At1g27900 PE=1 SV=1 && PF21010:Helicase associated domain (HA2), ratchet-like|PF07717:Oligonucleotide/oligosaccharide-binding (OB)-fold
novel.8475	3.47796	2.65e-63	POL3_DROME	pol	- && sp|P04323|POL3_DROME Retrovirus-related Pol polyprotein from transposon 17.6 OS=Drosophila melanogaster OX=7227 GN=pol PE=4 SV=1 && -
gene_QJQ45_022729	-1.90589	6.09e-63	FAD3D_ARATH	FAD8	hypothetical protein && sp|P48622|FAD3D_ARATH Temperature-sensitive sn-2 acyl-lipid omega-3 desaturase (ferredoxin), chloroplastic OS=Arabidopsis thaliana OX=3702 GN=FAD8 PE=1 SV=1 && PF11960:Domain of unknown function (DUF3474)|PF00487:Fatty acid desaturase
gene_QJQ45_016438	-1.46273	2.67e-62	HEM2_CHLRE	HEMB	hypothetical protein && sp|Q42682|HEM2_CHLRE Delta-aminolevulinic acid dehydratase, chloroplastic OS=Chlamydomonas reinhardtii OX=3055 GN=HEMB PE=2 SV=1 && PF00490:Delta-aminolevulinic acid dehydratase
gene_QJQ45_026935	1.38131	3.81e-62	SELO_MOUSE	Selenoo	hypothetical protein && sp|Q9DBC0|SELO_MOUSE Protein adenylyltransferase SelO, mitochondrial OS=Mus musculus OX=10090 GN=Selenoo PE=1 SV=4 && PF02696:Protein adenylyltransferase SelO
gene_QJQ45_010163	-1.47693	4.9e-62	TAF6B_ARATH	TAF6B	hypothetical protein && sp|F4HVA6|TAF6B_ARATH Transcription initiation factor TFIID subunit 6b OS=Arabidopsis thaliana OX=3702 GN=TAF6B PE=1 SV=1 && PF07571:TAF6 C-terminal HEAT repeat domain
gene_QJQ45_007609	1.12881	7.18e-62	CLPB1_THEEB	#N/A	hypothetical protein && sp|Q8DJ40|CLPB1_THEEB Chaperone protein ClpB 1 OS=Thermosynechococcus elongatus (strain BP-1) OX=197221 GN=clpB1 PE=3 SV=1 && PF07724:AAA domain (Cdc48 subfamily)|PF02861:Clp amino terminal domain, pathogenicity island component|PF17871:AAA lid domain|PF00004:ATPase family associated with various cellular activities (AAA)|PF10431:C-terminal, D2-small domain, of ClpB protein
gene_QJQ45_016819	-1.13025	1.34e-61	FER_CHLRE	PETF	hypothetical protein && sp|P07839|FER_CHLRE Ferredoxin, chloroplastic OS=Chlamydomonas reinhardtii OX=3055 GN=PETF PE=1 SV=2 && PF00111:2Fe-2S iron-sulfur cluster binding domain
gene_QJQ45_027123	1.03773	1.85e-61	MYCB2_MOUSE	Mycbp2	hypothetical protein && sp|Q7TPH6|MYCB2_MOUSE E3 ubiquitin-protein ligase MYCBP2 OS=Mus musculus OX=10090 GN=Mycbp2 PE=1 SV=3 && -
gene_QJQ45_020918	1.88174	2.02e-61	GCAT_AERHY	#N/A	hypothetical protein && sp|P10480|GCAT_AERHY Phosphatidylcholine-sterol acyltransferase OS=Aeromonas hydrophila OX=644 PE=1 SV=3 && PF00657:GDSL-like Lipase/Acylhydrolase
gene_QJQ45_016760	1.67467	3.85e-59	TGD2_ARATH	TGD2	hypothetical protein && sp|Q9LTR2|TGD2_ARATH Protein TRIGALACTOSYLDIACYLGLYCEROL 2, chloroplastic OS=Arabidopsis thaliana OX=3702 GN=TGD2 PE=1 SV=1 && PF02470:MlaD protein
gene_QJQ45_017343	1.02484	7.28e-59	PPIE_BOVIN	PPIE	hypothetical protein && sp|A4FV72|PPIE_BOVIN Peptidyl-prolyl cis-trans isomerase E OS=Bos taurus OX=9913 GN=PPIE PE=2 SV=1 && PF00076:RNA recognition motif|PF08547:Complex I intermediate-associated protein 30 (CIA30)
gene_QJQ45_007881	1.48682	1.25e-58	CNX2_ARATH	CNX2	hypothetical protein && sp|Q39055|CNX2_ARATH GTP 3',8-cyclase, mitochondrial OS=Arabidopsis thaliana OX=3702 GN=CNX2 PE=1 SV=1 && PF06463:Molybdenum Cofactor Synthesis C|PF04055:Radical SAM superfamily
gene_QJQ45_014065	1.0607	1.57e-58	CLPB1_THEEB	#N/A	hypothetical protein && sp|Q8DJ40|CLPB1_THEEB Chaperone protein ClpB 1 OS=Thermosynechococcus elongatus (strain BP-1) OX=197221 GN=clpB1 PE=3 SV=1 && PF07724:AAA domain (Cdc48 subfamily)|PF02861:Clp amino terminal domain, pathogenicity island component|PF00004:ATPase family associated with various cellular activities (AAA)|PF17871:AAA lid domain|PF10431:C-terminal, D2-small domain, of ClpB protein
gene_QJQ45_015039	1.94004	1.91e-58	NRT22_CHLRE	NRT2.2	hypothetical protein && sp|Q39609|NRT22_CHLRE Nitrate transporter 2.2 OS=Chlamydomonas reinhardtii OX=3055 GN=NRT2.2 PE=2 SV=2 && -
novel.2930	-1.15873	1.15e-57	HPGDS_CHICK	HPGDS	- && sp|O73888|HPGDS_CHICK Hematopoietic prostaglandin D synthase OS=Gallus gallus OX=9031 GN=HPGDS PE=1 SV=3 && -
gene_QJQ45_009641	-1.6106	3.81e-57	MY119_ARATH	MYB119	hypothetical protein && sp|Q9FIM4|MY119_ARATH Transcription factor MYB119 OS=Arabidopsis thaliana OX=3702 GN=MYB119 PE=2 SV=1 && PF00249:Myb-like DNA-binding domain
gene_QJQ45_023459	1.17275	6.52e-57	LIP_THELA	#N/A	hypothetical protein && sp|O59952|LIP_THELA Lipase OS=Thermomyces lanuginosus OX=5541 GN=LIP PE=1 SV=1 && PF01764:Lipase (class 3)
gene_QJQ45_023500	-1.0288	2.21e-56	ENO_CHLRE	ENO	hypothetical protein && sp|P31683|ENO_CHLRE Enolase (Fragment) OS=Chlamydomonas reinhardtii OX=3055 GN=ENO PE=2 SV=1 && PF03952:Enolase, N-terminal domain|PF00113:Enolase, C-terminal TIM barrel domain
gene_QJQ45_027701	4.2598	1.17e-55	DODA_BETVU	DODA	hypothetical protein && sp|Q70FG7|DODA_BETVU 4,5-DOPA dioxygenase extradiol OS=Beta vulgaris OX=161934 GN=DODA PE=1 SV=1 && PF02900:Catalytic LigB subunit of aromatic ring-opening dioxygenase|PF00106:short chain dehydrogenase|PF12796:Ankyrin repeats (3 copies)
gene_QJQ45_026858	-1.65448	1.68e-55	CTH1_CHLRE	CTH1	hypothetical protein && sp|Q9AR22|CTH1_CHLRE Magnesium-protoporphyrin IX monomethyl ester [oxidative] cyclase 2, chloroplastic OS=Chlamydomonas reinhardtii OX=3055 GN=CTH1 PE=2 SV=1 && PF02915:Rubrerythrin
gene_QJQ45_007238	-1.12657	1.69e-55	PRDX2_HUMAN	PRDX2	hypothetical protein && sp|P32119|PRDX2_HUMAN Peroxiredoxin-2 OS=Homo sapiens OX=9606 GN=PRDX2 PE=1 SV=5 && PF00578:AhpC/TSA family
gene_QJQ45_014338	1.03022	2.29e-55	GCSP_FLAAN	GDCSP	hypothetical protein && sp|O49850|GCSP_FLAAN Glycine dehydrogenase (decarboxylating), mitochondrial OS=Flaveria anomala OX=35877 GN=GDCSP PE=3 SV=1 && PF02347:Glycine cleavage system P-protein|PF21478:Glycine dehydrogenase, C-terminal domain
gene_QJQ45_002924	1.6629	5.11e-55	CY12_SOLTU	CYCL	hypothetical protein && sp|P29610|CY12_SOLTU Cytochrome c1-2, heme protein, mitochondrial (Fragment) OS=Solanum tuberosum OX=4113 GN=CYCL PE=1 SV=1 && PF02167:Cytochrome C1 family
gene_QJQ45_028501	-1.67576	8.34e-55	CAAT1_ARATH	CAT1	hypothetical protein && sp|Q84MA5|CAAT1_ARATH Cationic amino acid transporter 1 OS=Arabidopsis thaliana OX=3702 GN=CAT1 PE=1 SV=1 && PF13906:C-terminus of AA_permease|PF13520:Amino acid permease
gene_QJQ45_022293	-1.17559	2.71e-54	CYP22_ARATH	CYP22	hypothetical protein && sp|Q9ZVJ4|CYP22_ARATH Peptidyl-prolyl cis-trans isomerase CYP22 OS=Arabidopsis thaliana OX=3702 GN=CYP22 PE=2 SV=1 && PF00211:Adenylate and Guanylate cyclase catalytic domain|PF00160:Cyclophilin type peptidyl-prolyl cis-trans isomerase/CLD
gene_QJQ45_012602	-4.06029	6.38e-54	XDH2_HALVD	HVO_B0029	hypothetical protein && sp|D4GP30|XDH2_HALVD D-xylose 1-dehydrogenase (NADP(+)) 2 OS=Haloferax volcanii (strain ATCC 29605 / DSM 3757 / JCM 8879 / NBRC 14742 / NCIMB 2012 / VKM B-1768 / DS2) OX=309800 GN=HVO_B0029 PE=1 SV=1 && -
gene_QJQ45_028326	1.59428	7.46e-54	BGL07_ORYSJ	BGLU7	hypothetical protein && sp|Q75I93|BGL07_ORYSJ Beta-glucosidase 7 OS=Oryza sativa subsp. japonica OX=39947 GN=BGLU7 PE=1 SV=1 && PF00232:Glycosyl hydrolase family 1
gene_QJQ45_016632	-1.01327	8.21e-54	GRP2_NICSY	GRP-2	hypothetical protein && sp|P27484|GRP2_NICSY Glycine-rich protein 2 OS=Nicotiana sylvestris OX=4096 GN=GRP-2 PE=2 SV=1 && PF01693:Caulimovirus viroplasmin|PF19420:N,N dimethylarginine dimethylhydrolase, eukaryotic|PF00313:'Cold-shock' DNA-binding domain|PF13456:Reverse transcriptase-like|PF00076:RNA recognition motif
gene_QJQ45_025976	1.15434	1.21e-53	AMT13_SOLLC	AMT1-3	hypothetical protein && sp|Q9FVN0|AMT13_SOLLC Ammonium transporter 1 member 3 OS=Solanum lycopersicum OX=4081 GN=AMT1-3 PE=2 SV=1 && PF15985:KH domain|PF21266:RRP4, S1 domain|PF00909:Ammonium Transporter Family
gene_QJQ45_004262	3.64332	4.02e-53	PHO4_NEUCR	pho-4	hypothetical protein && sp|P15710|PHO4_NEUCR Phosphate-repressible phosphate permease pho-4 OS=Neurospora crassa (strain ATCC 24698 / 74-OR23-1A / CBS 708.71 / DSM 1257 / FGSC 987) OX=367110 GN=pho-4 PE=1 SV=1 && PF01384:Phosphate transporter family|PF08712:Scaffold protein Nfu/NifU N terminal
gene_QJQ45_025384	-1.44759	1.12e-52	MASY_EMENI	acuE	hypothetical protein && sp|P28344|MASY_EMENI Malate synthase, glyoxysomal OS=Emericella nidulans (strain FGSC A4 / ATCC 38163 / CBS 112.46 / NRRL 194 / M139) OX=227321 GN=acuE PE=3 SV=3 && PF01274:Malate synthase, TIM barrel domain|PF20659:Malate synthase, C-terminal
gene_QJQ45_025827	1.43925	2.67e-52	SPPA1_ARATH	SPPA	hypothetical protein && sp|Q9C9C0|SPPA1_ARATH Serine protease SPPA, chloroplastic OS=Arabidopsis thaliana OX=3702 GN=SPPA PE=2 SV=1 && PF01343:Peptidase family S49
gene_QJQ45_010774	1.31208	3.48e-52	BTGC_EMENI	btgC	hypothetical protein && sp|Q5B430|BTGC_EMENI Glucan endo-1,3-beta-glucosidase btgC OS=Emericella nidulans (strain FGSC A4 / ATCC 38163 / CBS 112.46 / NRRL 194 / M139) OX=227321 GN=btgC PE=2 SV=1 && -
gene_QJQ45_000210	-2.01012	1.23e-51	DDL_PSEU5	#N/A	hypothetical protein && sp|A4VII0|DDL_PSEU5 D-alanine--D-alanine ligase OS=Pseudomonas stutzeri (strain A1501) OX=379731 GN=ddl PE=3 SV=1 && PF07478:D-ala D-ala ligase C-terminus
gene_QJQ45_002134	-3.06796	2.24e-51	CHLH_ORYSI	CHLH	hypothetical protein && sp|B8ANF1|CHLH_ORYSI Magnesium-chelatase subunit ChlH, chloroplastic OS=Oryza sativa subsp. indica OX=39946 GN=CHLH PE=3 SV=1 && PF02514:CobN/Magnesium Chelatase
gene_QJQ45_018652	1.0333	2.38e-51	PUR6_VIGAC	PURKE	hypothetical protein && sp|P55195|PUR6_VIGAC Phosphoribosylaminoimidazole carboxylase, chloroplastic (Fragment) OS=Vigna aconitifolia OX=3918 GN=PURKE PE=2 SV=1 && PF02222:ATP-grasp domain|PF17769:Phosphoribosylaminoimidazole carboxylase C-terminal domain|PF00731:AIR carboxylase
gene_QJQ45_004185	2.41997	2.45e-51	DPOLM_HUMAN	POLM	hypothetical protein && sp|Q9NP87|DPOLM_HUMAN DNA-directed DNA/RNA polymerase mu OS=Homo sapiens OX=9606 GN=POLM PE=1 SV=1 && -
gene_QJQ45_009436	1.42621	3.11e-51	BGAL_PYRWO	#N/A	hypothetical protein && sp|O52629|BGAL_PYRWO Beta-galactosidase OS=Pyrococcus woesei OX=2262 PE=1 SV=1 && PF00232:Glycosyl hydrolase family 1
gene_QJQ45_028058	1.05223	4.15e-51	PUR5_VIGUN	PUR5	hypothetical protein && sp|P52424|PUR5_VIGUN Phosphoribosylformylglycinamidine cyclo-ligase, chloroplastic/mitochondrial OS=Vigna unguiculata OX=3917 GN=PUR5 PE=2 SV=1 && PF00586:AIR synthase related protein, N-terminal domain|PF02769:AIR synthase related protein, C-terminal domain
gene_QJQ45_019060	1.4037	1.58e-50	Y5390_ARATH	At5g03900	hypothetical protein && sp|Q8GW20|Y5390_ARATH Uncharacterized protein At5g03900, chloroplastic OS=Arabidopsis thaliana OX=3702 GN=At5g03900 PE=2 SV=2 && -
gene_QJQ45_012848	1.17246	1.68e-50	MAK3_ARATH	MAK3	hypothetical protein && sp|O80438|MAK3_ARATH N-alpha-acetyltransferase MAK3 OS=Arabidopsis thaliana OX=3702 GN=MAK3 PE=1 SV=1 && PF00583:Acetyltransferase (GNAT) family|PF00481:Protein phosphatase 2C
gene_QJQ45_018730	-1.48866	6.83e-50	LHCA5_ARATH	LHCA5	hypothetical protein && sp|Q9C639|LHCA5_ARATH Photosystem I chlorophyll a/b-binding protein 5, chloroplastic OS=Arabidopsis thaliana OX=3702 GN=LHCA5 PE=1 SV=1 && PF00504:Chlorophyll A-B binding protein
gene_QJQ45_022979	-1.85785	9.45e-50	FAD3D_ARATH	FAD8	hypothetical protein && sp|P48622|FAD3D_ARATH Temperature-sensitive sn-2 acyl-lipid omega-3 desaturase (ferredoxin), chloroplastic OS=Arabidopsis thaliana OX=3702 GN=FAD8 PE=1 SV=1 && PF00487:Fatty acid desaturase
gene_QJQ45_015882	-1.08443	6.81e-49	UCRIA_VOLCA	petC	hypothetical protein && sp|Q9SBN3|UCRIA_VOLCA Cytochrome b6-f complex iron-sulfur subunit, chloroplastic OS=Volvox carteri OX=3067 GN=petC PE=2 SV=1 && PF00355:Rieske [2Fe-2S] domain
gene_QJQ45_023399	1.48984	1.26e-48	MCATL_RAT	#N/A	hypothetical protein && sp|Q5HZE0|MCATL_RAT Mitochondrial basic amino acids transporter OS=Rattus norvegicus OX=10116 GN=Slc25a29 PE=2 SV=1 && PF00153:Mitochondrial carrier protein
gene_QJQ45_014015	-2.3009	1.29e-48	YG31B_YEAST	TY3B-G	hypothetical protein && sp|Q99315|YG31B_YEAST Transposon Ty3-G Gag-Pol polyprotein OS=Saccharomyces cerevisiae (strain ATCC 204508 / S288c) OX=559292 GN=TY3B-G PE=1 SV=3 && PF17917:RNase H-like domain found in reverse transcriptase|PF00385:Chromo (CHRromatin Organisation MOdifier) domain|PF17919:RNase H-like domain found in reverse transcriptase|PF00078:Reverse transcriptase (RNA-dependent DNA po…
novel.8673	-1.72173	7.54e-48	PX11A_ARATH	PEX11A	- && sp|Q9FZF1|PX11A_ARATH Peroxisomal membrane protein 11A OS=Arabidopsis thaliana OX=3702 GN=PEX11A PE=1 SV=1 && PF05648:Peroxisomal biogenesis factor 11 (PEX11)
gene_QJQ45_028779	2.01497	1.26e-47	ASAT1_ARATH	ASAT1	hypothetical protein && sp|Q9SV07|ASAT1_ARATH Acyl-CoA--sterol O-acyltransferase 1 OS=Arabidopsis thaliana OX=3702 GN=ASAT1 PE=1 SV=1 && -
gene_QJQ45_027725	1.41929	1.35e-47	FEY_ARATH	FEY	hypothetical protein && sp|F4JJR8|FEY_ARATH Dehydrogenase/reductase SDR family member FEY OS=Arabidopsis thaliana OX=3702 GN=FEY PE=1 SV=1 && PF00106:short chain dehydrogenase
gene_QJQ45_013871	-1.08196	1.9e-47	ADS3_ARATH	ADS3	hypothetical protein && sp|Q949X0|ADS3_ARATH Palmitoyl-monogalactosyldiacylglycerol delta-7 desaturase, chloroplastic OS=Arabidopsis thaliana OX=3702 GN=ADS3 PE=1 SV=2 && PF00487:Fatty acid desaturase
gene_QJQ45_022607	-1.22763	2.04e-47	TKTC1_ARATH	TKL-1	hypothetical protein && sp|Q8RWV0|TKTC1_ARATH Transketolase-1, chloroplastic OS=Arabidopsis thaliana OX=3702 GN=TKL-1 PE=1 SV=1 && PF00456:Transketolase, thiamine diphosphate binding domain|PF02780:Transketolase, C-terminal domain|PF02779:Transketolase, pyrimidine binding domain
gene_QJQ45_027882	-1.14459	2.72e-47	UCRIA_VOLCA	petC	hypothetical protein && sp|Q9SBN3|UCRIA_VOLCA Cytochrome b6-f complex iron-sulfur subunit, chloroplastic OS=Volvox carteri OX=3067 GN=petC PE=2 SV=1 && PF00355:Rieske [2Fe-2S] domain
gene_QJQ45_006989	5.55536	3.53e-47	PPA15_ARATH	PAP15	hypothetical protein && sp|Q9SFU3|PPA15_ARATH Purple acid phosphatase 15 OS=Arabidopsis thaliana OX=3702 GN=PAP15 PE=1 SV=1 && PF00149:Calcineurin-like phosphoesterase
gene_QJQ45_030198	1.27359	4.19e-47	PAO_ORYSJ	PAO	hypothetical protein && sp|Q0DV66|PAO_ORYSJ Pheophorbide a oxygenase, chloroplastic OS=Oryza sativa subsp. japonica OX=39947 GN=PAO PE=2 SV=1 && PF08417:Pheophorbide a oxygenase|PF00355:Rieske [2Fe-2S] domain
novel.2068	1.26123	1.5e-46	YEGS_XANC5	#N/A	- && sp|Q3BYC8|YEGS_XANC5 Probable lipid kinase YegS-like OS=Xanthomonas campestris pv. vesicatoria (strain 85-10) OX=316273 GN=XCV0504 PE=3 SV=1 && PF00781:Diacylglycerol kinase catalytic domain
gene_QJQ45_018685	3.60661	3.48e-46	PHO89_YEAST	PHO89	hypothetical protein && sp|P38361|PHO89_YEAST Phosphate permease PHO89 OS=Saccharomyces cerevisiae (strain ATCC 204508 / S288c) OX=559292 GN=PHO89 PE=1 SV=1 && PF01384:Phosphate transporter family
gene_QJQ45_022752	1.85349	3.6e-46	C356_FUNHE	cyp3a56	hypothetical protein && sp|Q8AXY5|C356_FUNHE Cytochrome P450 3A56 OS=Fundulus heteroclitus OX=8078 GN=cyp3a56 PE=2 SV=1 && PF00067:Cytochrome P450
gene_QJQ45_020430	1.01552	4.55e-46	DEGP8_ARATH	DEGP8	hypothetical protein && sp|Q9LU10|DEGP8_ARATH Protease Do-like 8, chloroplastic OS=Arabidopsis thaliana OX=3702 GN=DEGP8 PE=1 SV=1 && PF00072:Response regulator receiver domain|PF13365:Trypsin-like peptidase domain
gene_QJQ45_013902	1.02484	2.1e-45	LIP_THELA	#N/A	hypothetical protein && sp|O59952|LIP_THELA Lipase OS=Thermomyces lanuginosus OX=5541 GN=LIP PE=1 SV=1 && PF01764:Lipase (class 3)
gene_QJQ45_026324	3.51893	7.02e-45	PHO4_NEUCR	pho-4	hypothetical protein && sp|P15710|PHO4_NEUCR Phosphate-repressible phosphate permease pho-4 OS=Neurospora crassa (strain ATCC 24698 / 74-OR23-1A / CBS 708.71 / DSM 1257 / FGSC 987) OX=367110 GN=pho-4 PE=1 SV=1 && PF01384:Phosphate transporter family
novel.1846	4.52364	2.45e-44	PSBS1_CHLRE	PSBS1	- && sp|A8HPM2|PSBS1_CHLRE Photosystem II protein PSBS1 OS=Chlamydomonas reinhardtii OX=3055 GN=PSBS1 PE=1 SV=1 && -
novel.6942	1.21998	2.45e-44	PUR5_ARATH	#N/A	- && sp|Q05728|PUR5_ARATH Phosphoribosylformylglycinamidine cyclo-ligase, chloroplastic OS=Arabidopsis thaliana OX=3702 GN=PUR5 PE=1 SV=2 && -
gene_QJQ45_026748	1.52308	2.69e-44	UPM1_ARATH	UPM1	hypothetical protein && sp|Q42606|UPM1_ARATH S-adenosyl-L-methionine-dependent uroporphyrinogen III methyltransferase, chloroplastic OS=Arabidopsis thaliana OX=3702 GN=UPM1 PE=1 SV=1 && PF00590:Tetrapyrrole (Corrin/Porphyrin) Methylases
gene_QJQ45_025002	1.46956	2.77e-44	TGD2_ARATH	TGD2	hypothetical protein && sp|Q9LTR2|TGD2_ARATH Protein TRIGALACTOSYLDIACYLGLYCEROL 2, chloroplastic OS=Arabidopsis thaliana OX=3702 GN=TGD2 PE=1 SV=1 && PF02470:MlaD protein
gene_QJQ45_020428	-1.91161	4.02e-44	DCVR_CUCSA	DVR	hypothetical protein && sp|J9RYI6|DCVR_CUCSA Divinyl chlorophyllide a 8-vinyl-reductase, chloroplastic OS=Cucumis sativus OX=3659 GN=DVR PE=1 SV=1 && PF13460:NAD(P)H-binding
gene_QJQ45_014062	2.92879	5.74e-44	CATC_BOVIN	CTSC	hypothetical protein && sp|Q3ZCJ8|CATC_BOVIN Dipeptidyl peptidase 1 OS=Bos taurus OX=9913 GN=CTSC PE=2 SV=1 && PF00112:Papain family cysteine protease
gene_QJQ45_019001	1.44446	6.26e-44	GALK1_ARATH	GAL1	hypothetical protein && sp|Q9SEE5|GALK1_ARATH Galactokinase OS=Arabidopsis thaliana OX=3702 GN=GAL1 PE=1 SV=2 && PF08544:GHMP kinases C terminal|PF10509:Galactokinase galactose-binding signature|PF00288:GHMP kinases N terminal domain
gene_QJQ45_004563	1.58573	8.45e-44	TBB_CHLIN	TUBB	hypothetical protein && sp|O04386|TBB_CHLIN Tubulin beta chain OS=Chlamydomonas incerta OX=51695 GN=TUBB PE=3 SV=1 && PF03953:Tubulin C-terminal domain|PF00091:Tubulin/FtsZ family, GTPase domain
gene_QJQ45_021326	1.28013	2.49e-43	Y2766_ARATH	At2g37660	hypothetical protein && sp|O80934|Y2766_ARATH Uncharacterized protein At2g37660, chloroplastic OS=Arabidopsis thaliana OX=3702 GN=At2g37660 PE=1 SV=2 && PF13460:NAD(P)H-binding
novel.997	-2.4456	8.9e-43	S23A1_HUMAN	SLC23A1	- && sp|Q9UHI7|S23A1_HUMAN Solute carrier family 23 member 1 OS=Homo sapiens OX=9606 GN=SLC23A1 PE=1 SV=4 && PF00860:Permease family
gene_QJQ45_015264	-1.33291	9.3e-43	OXDD_BOVIN	DDO	hypothetical protein && sp|P31228|OXDD_BOVIN D-aspartate oxidase OS=Bos taurus OX=9913 GN=DDO PE=1 SV=2 && PF01266:FAD dependent oxidoreductase
gene_QJQ45_017557	1.34746	1.42e-42	SPPA1_ARATH	SPPA	hypothetical protein && sp|Q9C9C0|SPPA1_ARATH Serine protease SPPA, chloroplastic OS=Arabidopsis thaliana OX=3702 GN=SPPA PE=2 SV=1 && PF01343:Peptidase family S49
gene_QJQ45_018487	-1.00264	4.17e-42	CP51_SORBI	CYP51	hypothetical protein && sp|P93846|CP51_SORBI Obtusifoliol 14-alpha demethylase OS=Sorghum bicolor OX=4558 GN=CYP51 PE=1 SV=1 && PF00067:Cytochrome P450
gene_QJQ45_011956	-1.28683	4.98e-42	P20D1_XENTR	pm20d1	hypothetical protein && sp|Q08BT9|P20D1_XENTR N-fatty-acyl-amino acid synthase/hydrolase PM20D1 OS=Xenopus tropicalis OX=8364 GN=pm20d1 PE=2 SV=1 && PF01546:Peptidase family M20/M25/M40
gene_QJQ45_000569	1.44048	7.07e-42	CCD8A_ORYSJ	CCD8A	hypothetical protein && sp|Q93VD5|CCD8A_ORYSJ Carotenoid cleavage dioxygenase 8 homolog A, chloroplastic OS=Oryza sativa subsp. japonica OX=39947 GN=CCD8A PE=2 SV=1 && PF03055:Retinal pigment epithelial membrane protein
gene_QJQ45_021433	-1.41126	8.15e-42	LTD_ARATH	LTD	hypothetical protein && sp|Q8VY88|LTD_ARATH Protein LHCP TRANSLOCATION DEFECT OS=Arabidopsis thaliana OX=3702 GN=LTD PE=1 SV=1 && -
gene_QJQ45_029302	-1.5596	1.4e-41	CB2_CHLMO	#N/A	hypothetical protein && sp|P22686|CB2_CHLMO Chlorophyll a-b binding protein of LHCII type I, chloroplastic OS=Chlamydomonas moewusii OX=3054 PE=2 SV=1 && PF00504:Chlorophyll A-B binding protein
gene_QJQ45_013818	3.70319	1.47e-41	PSBS1_CHLRE	PSBS1	hypothetical protein && sp|A8HPM2|PSBS1_CHLRE Photosystem II protein PSBS1 OS=Chlamydomonas reinhardtii OX=3055 GN=PSBS1 PE=1 SV=1 && -
gene_QJQ45_016594	1.16713	2.06e-41	GGHA_DICDI	gghA	hypothetical protein && sp|Q54LN4|GGHA_DICDI Gamma-glutamyl hydrolase A OS=Dictyostelium discoideum OX=44689 GN=gghA PE=3 SV=1 && -
gene_QJQ45_000551	1.81246	2.87e-41	AB25B_ARATH	ABCB25	hypothetical protein && sp|Q9LVM1|AB25B_ARATH ABC transporter B family member 25, mitochondrial OS=Arabidopsis thaliana OX=3702 GN=ABCB25 PE=1 SV=1 && PF00664:ABC transporter transmembrane region|PF00005:ABC transporter
gene_QJQ45_003231	1.4249	3.1e-41	BGAL_PYRWO	#N/A	hypothetical protein && sp|O52629|BGAL_PYRWO Beta-galactosidase OS=Pyrococcus woesei OX=2262 PE=1 SV=1 && PF00232:Glycosyl hydrolase family 1
gene_QJQ45_010092	-1.01344	3.86e-41	CP51_SORBI	CYP51	hypothetical protein && sp|P93846|CP51_SORBI Obtusifoliol 14-alpha demethylase OS=Sorghum bicolor OX=4558 GN=CYP51 PE=1 SV=1 && PF00067:Cytochrome P450
gene_QJQ45_008156	1.01092	3.89e-41	HPPD_DAUCA	#N/A	hypothetical protein && sp|O23920|HPPD_DAUCA 4-hydroxyphenylpyruvate dioxygenase OS=Daucus carota OX=4039 PE=2 SV=1 && -
gene_QJQ45_016068	1.28684	3.97e-41	PLSP1_ARATH	PLSP1	hypothetical protein && sp|Q8H0W1|PLSP1_ARATH Chloroplast processing peptidase OS=Arabidopsis thaliana OX=3702 GN=PLSP1 PE=2 SV=2 && PF10502:Signal peptidase, peptidase S26
gene_QJQ45_019945	-3.36028	7.22e-41	MPK15_ORYSJ	MPK15	hypothetical protein && sp|Q53N72|MPK15_ORYSJ Mitogen-activated protein kinase 15 OS=Oryza sativa subsp. japonica OX=39947 GN=MPK15 PE=2 SV=1 && PF13976:GAG-pre-integrase domain|PF00069:Protein kinase domain|PF07727:Reverse transcriptase (RNA-dependent DNA polymerase)|PF00665:Integrase core domain
gene_QJQ45_028214	1.00959	1.21e-40	WWOX_MOUSE	Wwox	hypothetical protein && sp|Q91WL8|WWOX_MOUSE WW domain-containing oxidoreductase OS=Mus musculus OX=10090 GN=Wwox PE=1 SV=1 && PF00106:short chain dehydrogenase|PF08243:SPT2 chromatin protein
gene_QJQ45_012751	1.86776	2.5e-40	GALK2_RAT	Galk2	hypothetical protein && sp|Q5XIG6|GALK2_RAT N-acetylgalactosamine kinase OS=Rattus norvegicus OX=10116 GN=Galk2 PE=2 SV=1 && PF00288:GHMP kinases N terminal domain|PF10509:Galactokinase galactose-binding signature
gene_QJQ45_009076	-2.8969	3.72e-40	HS16A_WHEAT	hsp16.9A	hypothetical protein && sp|P12810|HS16A_WHEAT 16.9 kDa class I heat shock protein 1 OS=Triticum aestivum OX=4565 GN=hsp16.9A PE=2 SV=1 && PF00011:Hsp20/alpha crystallin family
gene_QJQ45_000008	1.06861	5.01e-40	6PGD3_ARATH	PGD3	hypothetical protein && sp|Q9FFR3|6PGD3_ARATH 6-phosphogluconate dehydrogenase, decarboxylating 3, chloroplastic OS=Arabidopsis thaliana OX=3702 GN=PGD3 PE=1 SV=1 && PF00393:6-phosphogluconate dehydrogenase, C-terminal domain|PF03446:NAD binding domain of 6-phosphogluconate dehydrogenase
novel.1312	3.76389	5.67e-40	3AHDP_RUMGV	#N/A	- && sp|A7B3K3|3AHDP_RUMGV 3alpha-hydroxysteroid dehydrogenase OS=Ruminococcus gnavus (strain ATCC 29149 / VPI C7-9) OX=411470 GN=baiA PE=1 SV=1 && -
gene_QJQ45_024698	1.61291	6.72e-40	CATL_DROME	#N/A	hypothetical protein && sp|Q95029|CATL_DROME Cathepsin L OS=Drosophila melanogaster OX=7227 GN=Cp1 PE=2 SV=2 && PF00112:Papain family cysteine protease
gene_QJQ45_029441	2.62275	1.25e-39	RTE1_ARATH	RTE1	hypothetical protein && sp|F4ITL6|RTE1_ARATH Protein REVERSION-TO-ETHYLENE SENSITIVITY1 OS=Arabidopsis thaliana OX=3702 GN=RTE1 PE=1 SV=1 && PF05608:Protein of unknown function (DUF778)
gene_QJQ45_022410	-2.40982	2.26e-39	MPK15_ORYSJ	MPK15	hypothetical protein && sp|Q53N72|MPK15_ORYSJ Mitogen-activated protein kinase 15 OS=Oryza sativa subsp. japonica OX=39947 GN=MPK15 PE=2 SV=1 && PF00069:Protein kinase domain
gene_QJQ45_016888	1.37339	4.67e-39	NNRD_USTMA	#N/A	hypothetical protein && sp|Q4P219|NNRD_USTMA ATP-dependent (S)-NAD(P)H-hydrate dehydratase OS=Ustilago maydis (strain 521 / FGSC 9021) OX=237631 GN=UMAG_05844 PE=3 SV=1 && PF02790:Cytochrome C oxidase subunit II, transmembrane domain|PF01256:Carbohydrate kinase
gene_QJQ45_006998	3.93439	6.32e-39	YHDF_BACSU	yhdF	hypothetical protein && sp|O07575|YHDF_BACSU Uncharacterized oxidoreductase YhdF OS=Bacillus subtilis (strain 168) OX=224308 GN=yhdF PE=3 SV=1 && PF13561:Enoyl-(Acyl carrier protein) reductase
gene_QJQ45_006587	-1.24879	1.03e-38	MX1_ICTPU	mx1	hypothetical protein && sp|Q7T2P0|MX1_ICTPU Interferon-induced GTP-binding protein Mx1 OS=Ictalurus punctatus OX=7998 GN=mx1 PE=2 SV=1 && PF01031:Dynamin central region|PF00350:Dynamin family
novel.8547	-1.43928	1.44e-38	PNK1_SCHPO	pnk1	- && sp|O13911|PNK1_SCHPO Bifunctional polynucleotide phosphatase/kinase OS=Schizosaccharomyces pombe (strain 972 / ATCC 24843) OX=284812 GN=pnk1 PE=1 SV=2 && -
gene_QJQ45_019148	1.92583	1.59e-38	MOK_HUMAN	MOK	hypothetical protein && sp|Q9UQ07|MOK_HUMAN MAPK/MAK/MRK overlapping kinase OS=Homo sapiens OX=9606 GN=MOK PE=2 SV=1 && PF00069:Protein kinase domain
gene_QJQ45_015985	2.01388	1.85e-38	MRP4_HUMAN	ABCC4	hypothetical protein && sp|O15439|MRP4_HUMAN ATP-binding cassette sub-family C member 4 OS=Homo sapiens OX=9606 GN=ABCC4 PE=1 SV=3 && PF00005:ABC transporter|PF00664:ABC transporter transmembrane region
novel.5161	-1.76005	2.15e-38	CAH1_CHLRE	CAH1	- && sp|P20507|CAH1_CHLRE Carbonic anhydrase 1 OS=Chlamydomonas reinhardtii OX=3055 GN=CAH1 PE=1 SV=1 && -
gene_QJQ45_008307	2.49216	2.75e-38	PO21_NASVI	#N/A	hypothetical protein && sp|Q03278|PO21_NASVI Retrovirus-related Pol polyprotein from type-1 retrotransposable element R2 (Fragment) OS=Nasonia vitripennis OX=7425 PE=4 SV=2 && PF00078:Reverse transcriptase (RNA-dependent DNA polymerase)
gene_QJQ45_018471	1.00362	2.94e-38	DEGP1_ARATH	DEGP1	hypothetical protein && sp|O22609|DEGP1_ARATH Protease Do-like 1, chloroplastic OS=Arabidopsis thaliana OX=3702 GN=DEGP1 PE=1 SV=2 && PF13365:Trypsin-like peptidase domain
gene_QJQ45_017693	1.35786	4.16e-38	YOOC_SCHPO	#N/A	hypothetical protein && sp|O94296|YOOC_SCHPO Probable phospholipid-transporting ATPase C887.12 OS=Schizosaccharomyces pombe (strain 972 / ATCC 24843) OX=284812 GN=SPBC887.12 PE=3 SV=1 && -
gene_QJQ45_022989	-1.01091	5.92e-38	KAD4_ORYSJ	ADK-B	hypothetical protein && sp|Q08480|KAD4_ORYSJ Adenylate kinase 4 OS=Oryza sativa subsp. japonica OX=39947 GN=ADK-B PE=2 SV=1 && PF00406:Adenylate kinase|PF05191:Adenylate kinase, active site lid
gene_QJQ45_000809	1.56813	8.7e-38	ASAT1_ARATH	ASAT1	hypothetical protein && sp|Q9SV07|ASAT1_ARATH Acyl-CoA--sterol O-acyltransferase 1 OS=Arabidopsis thaliana OX=3702 GN=ASAT1 PE=1 SV=1 && -
gene_QJQ45_023998	1.31575	7.89e-37	ISS1_ARATH	ISS1	hypothetical protein && sp|Q9C969|ISS1_ARATH Aromatic aminotransferase ISS1 OS=Arabidopsis thaliana OX=3702 GN=ISS1 PE=1 SV=1 && PF00155:Aminotransferase class I and II
gene_QJQ45_008176	-1.04847	1.03e-36	TIC62_PEA	TIC62	hypothetical protein && sp|Q8SKU2|TIC62_PEA Protein TIC 62, chloroplastic OS=Pisum sativum OX=3888 GN=TIC62 PE=1 SV=2 && -
gene_QJQ45_021318	-1.39724	1.19e-36	ZNFX1_MOUSE	Znfx1	hypothetical protein && sp|Q8R151|ZNFX1_MOUSE NFX1-type zinc finger-containing protein 1 OS=Mus musculus OX=10090 GN=Znfx1 PE=1 SV=3 && PF13087:AAA domain|PF00004:ATPase family associated with various cellular activities (AAA)|PF17866:AAA lid domain|PF13086:AAA domain
gene_QJQ45_008926	-1.22689	1.34e-36	PPD5_ARATH	PPD5	hypothetical protein && sp|P82715|PPD5_ARATH PsbP domain-containing protein 5, chloroplastic OS=Arabidopsis thaliana OX=3702 GN=PPD5 PE=1 SV=3 && -
gene_QJQ45_024852	1.68836	2.93e-36	CFAD_DICDI	cfaD	hypothetical protein && sp|Q54TR1|CFAD_DICDI Counting factor associated protein D OS=Dictyostelium discoideum OX=44689 GN=cfaD PE=1 SV=1 && PF00112:Papain family cysteine protease
novel.8538	1.33295	4.45e-36	SPT20_HUMAN	#N/A	- && sp|Q8TB22|SPT20_HUMAN Spermatogenesis-associated protein 20 OS=Homo sapiens OX=9606 GN=SPATA20 PE=2 SV=3 && -
gene_QJQ45_020281	1.12031	5.59e-36	DET2_SOLLC	DET2	hypothetical protein && sp|Q5K2N1|DET2_SOLLC Steroid 5-alpha-reductase DET2 OS=Solanum lycopersicum OX=4081 GN=DET2 PE=1 SV=1 && PF02544:3-oxo-5-alpha-steroid 4-dehydrogenase
gene_QJQ45_003224	1.31863	9.36e-36	DTX54_ARATH	DTX54	hypothetical protein && sp|Q9LE20|DTX54_ARATH Protein DETOXIFICATION 54 OS=Arabidopsis thaliana OX=3702 GN=DTX54 PE=2 SV=1 && PF01554:MatE
gene_QJQ45_018019	-1.59188	1.15e-35	DTC_ARATH	DTC	hypothetical protein && sp|Q9C5M0|DTC_ARATH Mitochondrial dicarboxylate/tricarboxylate transporter DTC OS=Arabidopsis thaliana OX=3702 GN=DTC PE=1 SV=1 && PF00153:Mitochondrial carrier protein
gene_QJQ45_016203	-1.20147	1.33e-35	CLPS1_CHLRE	CLPS1	hypothetical protein && sp|A0A2K3CNL6|CLPS1_CHLRE ATP-dependent Clp protease adapter protein CLPS1, chloroplastic OS=Chlamydomonas reinhardtii OX=3055 GN=CLPS1 PE=3 SV=1 && PF02617:ATP-dependent Clp protease adaptor protein ClpS
gene_QJQ45_009805	3.12441	1.91e-35	CBR_DUNSA	CBR	hypothetical protein && sp|P27516|CBR_DUNSA Carotene biosynthesis-related protein CBR, chloroplastic OS=Dunaliella salina OX=3046 GN=CBR PE=1 SV=1 && -
novel.8248	1.28812	2.95e-35	FER1_DESAF	fd1	- && sp|P00210|FER1_DESAF Ferredoxin-1 OS=Desulfocurvibacter africanus OX=873 GN=fd1 PE=1 SV=3 && -
gene_QJQ45_026979	1.44221	3.53e-35	KCY3_ARATH	UMK3	hypothetical protein && sp|O04905|KCY3_ARATH UMP-CMP kinase 3 OS=Arabidopsis thaliana OX=3702 GN=UMK3 PE=1 SV=1 && PF00406:Adenylate kinase
gene_QJQ45_017461	1.19926	3.88e-35	RDH14_HUMAN	RDH14	hypothetical protein && sp|Q9HBH5|RDH14_HUMAN Retinol dehydrogenase 14 OS=Homo sapiens OX=9606 GN=RDH14 PE=1 SV=1 && PF00106:short chain dehydrogenase
gene_QJQ45_009071	-3.85218	4.62e-35	HS16A_WHEAT	hsp16.9A	hypothetical protein && sp|P12810|HS16A_WHEAT 16.9 kDa class I heat shock protein 1 OS=Triticum aestivum OX=4565 GN=hsp16.9A PE=2 SV=1 && PF00011:Hsp20/alpha crystallin family
gene_QJQ45_028765	2.1491	5.21e-35	AT2B1_CHICK	ATP2B1	hypothetical protein && sp|Q98SH2|AT2B1_CHICK Plasma membrane calcium-transporting ATPase 1 OS=Gallus gallus OX=9031 GN=ATP2B1 PE=2 SV=2 && PF00689:Cation transporting ATPase, C-terminus
gene_QJQ45_015063	-3.23789	1.77e-34	NAT1_ARATH	NAT1	hypothetical protein && sp|Q9SHZ3|NAT1_ARATH Nucleobase-ascorbate transporter 1 OS=Arabidopsis thaliana OX=3702 GN=NAT1 PE=2 SV=1 && PF00860:Permease family
gene_QJQ45_004731	1.35055	5.94e-34	EDR2L_ARATH	EDR2L	hypothetical protein && sp|Q8VZF6|EDR2L_ARATH Protein ENHANCED DISEASE RESISTANCE 2-like OS=Arabidopsis thaliana OX=3702 GN=EDR2L PE=2 SV=1 && PF07059:Protein ENHANCED DISEASE RESISTANCE 2, C-terminal
gene_QJQ45_014128	1.04826	1.19e-33	PI5K9_ARATH	PIP5K9	hypothetical protein && sp|Q8L850|PI5K9_ARATH Phosphatidylinositol 4-phosphate 5-kinase 9 OS=Arabidopsis thaliana OX=3702 GN=PIP5K9 PE=1 SV=2 && PF01504:Phosphatidylinositol-4-phosphate 5-Kinase
gene_QJQ45_027030	-1.10914	1.95e-33	C7101_ARATH	CYP710A1	hypothetical protein && sp|O64697|C7101_ARATH Cytochrome P450 710A1 OS=Arabidopsis thaliana OX=3702 GN=CYP710A1 PE=1 SV=1 && PF00067:Cytochrome P450
gene_QJQ45_023194	-1.47218	1.98e-33	MTPC3_ARATH	MTPC3	hypothetical protein && sp|Q9M2P2|MTPC3_ARATH Putative metal tolerance protein C3 OS=Arabidopsis thaliana OX=3702 GN=MTPC3 PE=3 SV=2 && PF09733:VEFS-Box of polycomb protein
gene_QJQ45_007894	-2.27188	1.07e-32	G3PA_CHLRE	GAPA	hypothetical protein && sp|P50362|G3PA_CHLRE Glyceraldehyde-3-phosphate dehydrogenase A, chloroplastic OS=Chlamydomonas reinhardtii OX=3055 GN=GAPA PE=1 SV=1 && PF02800:Glyceraldehyde 3-phosphate dehydrogenase, C-terminal domain|PF00044:Glyceraldehyde 3-phosphate dehydrogenase, NAD binding domain
gene_QJQ45_020995	-2.34374	1.19e-32	PRXQ_GENTR	AFP1	hypothetical protein && sp|Q75SY5|PRXQ_GENTR Peroxiredoxin Q, chloroplastic OS=Gentiana triflora OX=55190 GN=AFP1 PE=2 SV=1 && PF00578:AhpC/TSA family
gene_QJQ45_023441	1.18883	4.34e-32	GPMA_GEOSM	gpmA	hypothetical protein && sp|C6E639|GPMA_GEOSM 2,3-bisphosphoglycerate-dependent phosphoglycerate mutase OS=Geobacter sp. (strain M21) OX=443144 GN=gpmA PE=3 SV=1 && -
gene_QJQ45_025092	-1.08308	8.18e-32	PSAE_CHLRE	PSAE	hypothetical protein && sp|P12352|PSAE_CHLRE Photosystem I reaction center subunit IV, chloroplastic OS=Chlamydomonas reinhardtii OX=3055 GN=PSAE PE=1 SV=1 && PF02427:Photosystem I reaction centre subunit IV / PsaE
gene_QJQ45_022286	1.20199	1.23e-31	TATB_MAIZE	TATB	hypothetical protein && sp|O48950|TATB_MAIZE Sec-independent protein translocase protein TATB, chloroplastic OS=Zea mays OX=4577 GN=TATB PE=1 SV=1 && PF02416:mttA/Hcf106 family|PF14234:Domain of unknown function (DUF4336)
novel.5602	1.11881	1.47e-31	CDPKJ_ORYSJ	CPK19	- && sp|P53683|CDPKJ_ORYSJ Calcium-dependent protein kinase 19 OS=Oryza sativa subsp. japonica OX=39947 GN=CPK19 PE=2 SV=2 && PF00069:Protein kinase domain|PF13499:EF-hand domain pair
gene_QJQ45_016375	1.14401	1.55e-31	FSP1_XENTR	aifm2	hypothetical protein && sp|B4F6I3|FSP1_XENTR Ferroptosis suppressor protein 1 OS=Xenopus tropicalis OX=8364 GN=aifm2 PE=2 SV=1 && PF07992:Pyridine nucleotide-disulphide oxidoreductase
gene_QJQ45_014238	1.39609	1.7e-31	HGD_ORYSJ	HGO	hypothetical protein && sp|Q5VRH4|HGD_ORYSJ Homogentisate 1,2-dioxygenase OS=Oryza sativa subsp. japonica OX=39947 GN=HGO PE=2 SV=1 && PF04209:Homogentisate 1,2-dioxygenase C-terminal|PF20510:Homogentisate 1,2-dioxygenase N-terminal
gene_QJQ45_006415	3.40883	1.9e-31	TF212_SCHPO	Tf2-12	hypothetical protein && sp|P0CT41|TF212_SCHPO Transposon Tf2-12 polyprotein OS=Schizosaccharomyces pombe (strain 972 / ATCC 24843) OX=284812 GN=Tf2-12 PE=3 SV=1 && PF00078:Reverse transcriptase (RNA-dependent DNA polymerase)|PF17917:RNase H-like domain found in reverse transcriptase|PF00385:Chromo (CHRromatin Organisation MOdifier) domain|PF17921:Integrase zinc binding domain
gene_QJQ45_017963	2.40162	1.93e-31	SIS8_ARATH	SIS8	hypothetical protein && sp|Q9C9U5|SIS8_ARATH Probable serine/threonine-protein kinase SIS8 OS=Arabidopsis thaliana OX=3702 GN=SIS8 PE=1 SV=1 && PF07714:Protein tyrosine and serine/threonine kinase
gene_QJQ45_025200	2.557	2.47e-31	CALS6_ARATH	CALS6	hypothetical protein && sp|Q9LYS6|CALS6_ARATH Putative callose synthase 6 OS=Arabidopsis thaliana OX=3702 GN=CALS6 PE=3 SV=2 && PF02364:1,3-beta-glucan synthase component
gene_QJQ45_019154	1.06126	2.69e-31	Y2766_ARATH	At2g37660	hypothetical protein && sp|O80934|Y2766_ARATH Uncharacterized protein At2g37660, chloroplastic OS=Arabidopsis thaliana OX=3702 GN=At2g37660 PE=1 SV=2 && PF13460:NAD(P)H-binding
gene_QJQ45_025796	1.07589	3.46e-31	AT8A2_HUMAN	ATP8A2	hypothetical protein && sp|Q9NTI2|AT8A2_HUMAN Phospholipid-transporting ATPase IB OS=Homo sapiens OX=9606 GN=ATP8A2 PE=1 SV=3 && -
gene_QJQ45_011009	-1.16438	4.17e-31	DTC_ARATH	DTC	hypothetical protein && sp|Q9C5M0|DTC_ARATH Mitochondrial dicarboxylate/tricarboxylate transporter DTC OS=Arabidopsis thaliana OX=3702 GN=DTC PE=1 SV=1 && PF00153:Mitochondrial carrier protein
gene_QJQ45_022311	1.07717	4.51e-31	CBR_DUNSA	CBR	hypothetical protein && sp|P27516|CBR_DUNSA Carotene biosynthesis-related protein CBR, chloroplastic OS=Dunaliella salina OX=3046 GN=CBR PE=1 SV=1 && -
gene_QJQ45_025826	1.34264	5.66e-31	SPPA1_ARATH	SPPA	hypothetical protein && sp|Q9C9C0|SPPA1_ARATH Serine protease SPPA, chloroplastic OS=Arabidopsis thaliana OX=3702 GN=SPPA PE=2 SV=1 && PF01343:Peptidase family S49
gene_QJQ45_019589	1.05954	7.07e-31	BQMT_SYNY3	sll0418	hypothetical protein && sp|P74388|BQMT_SYNY3 2-methyl-6-phytyl-1,4-hydroquinone methyltransferase OS=Synechocystis sp. (strain PCC 6803 / Kazusa) OX=1111708 GN=sll0418 PE=1 SV=1 && PF13649:Methyltransferase domain|PF03153:Transcription factor IIA, alpha/beta subunit
gene_QJQ45_004619	1.05301	9.54e-31	MAK3_ARATH	MAK3	hypothetical protein && sp|O80438|MAK3_ARATH N-alpha-acetyltransferase MAK3 OS=Arabidopsis thaliana OX=3702 GN=MAK3 PE=1 SV=1 && PF00583:Acetyltransferase (GNAT) family|PF00481:Protein phosphatase 2C
gene_QJQ45_015034	1.72733	1.03e-30	NRT21_CHLRE	NRT2.1	hypothetical protein && sp|Q39608|NRT21_CHLRE Nitrate transporter 2.1 OS=Chlamydomonas reinhardtii OX=3055 GN=NRT2.1 PE=2 SV=1 && PF07690:Major Facilitator Superfamily
gene_QJQ45_019171	-1.16606	1.1e-30	ZNFX1_MOUSE	Znfx1	hypothetical protein && sp|Q8R151|ZNFX1_MOUSE NFX1-type zinc finger-containing protein 1 OS=Mus musculus OX=10090 GN=Znfx1 PE=1 SV=3 && PF13086:AAA domain|PF13087:AAA domain|PF00004:ATPase family associated with various cellular activities (AAA)
gene_QJQ45_017806	-1.70805	1.6e-30	MY119_ARATH	MYB119	hypothetical protein && sp|Q9FIM4|MY119_ARATH Transcription factor MYB119 OS=Arabidopsis thaliana OX=3702 GN=MYB119 PE=2 SV=1 && PF00249:Myb-like DNA-binding domain
gene_QJQ45_005444	1.07927	2.9e-30	PUR5_VIGUN	PUR5	hypothetical protein && sp|P52424|PUR5_VIGUN Phosphoribosylformylglycinamidine cyclo-ligase, chloroplastic/mitochondrial OS=Vigna unguiculata OX=3917 GN=PUR5 PE=2 SV=1 && PF00586:AIR synthase related protein, N-terminal domain
gene_QJQ45_021779	-5.49023	5.14e-30	NAT5_ARATH	NAT5	hypothetical protein && sp|Q8RWE9|NAT5_ARATH Nucleobase-ascorbate transporter 5 OS=Arabidopsis thaliana OX=3702 GN=NAT5 PE=2 SV=1 && -
gene_QJQ45_016049	-2.31432	6.14e-30	H32_BOVIN	#N/A	hypothetical protein && sp|P84227|H32_BOVIN Histone H3.2 OS=Bos taurus OX=9913 PE=1 SV=2 && PF00125:Core histone H2A/H2B/H3/H4
novel.7231	1.52638	8.65e-30	BPT1_YEAST	BPT1	- && sp|P14772|BPT1_YEAST Bile pigment transporter 1 OS=Saccharomyces cerevisiae (strain ATCC 204508 / S288c) OX=559292 GN=BPT1 PE=1 SV=2 && PF00664:ABC transporter transmembrane region
gene_QJQ45_018017	1.30519	2.32e-29	ATZF_PSESD	atzF	hypothetical protein && sp|Q936X2|ATZF_PSESD Allophanate hydrolase OS=Pseudomonas sp. (strain ADP) OX=47660 GN=atzF PE=1 SV=1 && PF01425:Amidase
gene_QJQ45_019921	-2.65546	4.08e-29	PABP_SCHPO	pab1	hypothetical protein && sp|P31209|PABP_SCHPO Polyadenylate-binding protein, cytoplasmic and nuclear OS=Schizosaccharomyces pombe (strain 972 / ATCC 24843) OX=284812 GN=pab1 PE=1 SV=2 && PF00076:RNA recognition motif|PF00484:Carbonic anhydrase|PF00658:Poly-adenylate binding protein, unique domain
gene_QJQ45_008482	-1.06124	6.37e-29	KAPCA_RAT	Prkaca	hypothetical protein && sp|P27791|KAPCA_RAT cAMP-dependent protein kinase catalytic subunit alpha OS=Rattus norvegicus OX=10116 GN=Prkaca PE=1 SV=2 && PF00069:Protein kinase domain
gene_QJQ45_004073	-1.83959	6.55e-29	GLOX_VITPS	GLOX	hypothetical protein && sp|Q3HRQ2|GLOX_VITPS Aldehyde oxidase GLOX OS=Vitis pseudoreticulata OX=231512 GN=GLOX PE=2 SV=1 && PF07250:Glyoxal oxidase N-terminus|PF09118:Galactose oxidase-like, Early set domain
novel.7796	1.65513	7.7e-29	IPCS_ORYSI	#N/A	- && sp|B8ACH9|IPCS_ORYSI Phosphatidylinositol:ceramide inositolphosphotransferase OS=Oryza sativa subsp. indica OX=39946 GN=ERH1 PE=3 SV=1 && -
gene_QJQ45_022625	-1.27575	3.52e-28	SSY4_ARATH	SS4	hypothetical protein && sp|Q0WVX5|SSY4_ARATH Probable starch synthase 4, chloroplastic/amyloplastic OS=Arabidopsis thaliana OX=3702 GN=SS4 PE=1 SV=1 && PF00534:Glycosyl transferases group 1|PF08323:Starch synthase catalytic domain
gene_QJQ45_025772	2.14371	3.86e-28	CALS6_ARATH	CALS6	hypothetical protein && sp|Q9LYS6|CALS6_ARATH Putative callose synthase 6 OS=Arabidopsis thaliana OX=3702 GN=CALS6 PE=3 SV=2 && PF02364:1,3-beta-glucan synthase component
gene_QJQ45_006170	-1.59714	4.85e-28	YI31B_YEAST	TY3B-I	hypothetical protein && sp|Q7LHG5|YI31B_YEAST Transposon Ty3-I Gag-Pol polyprotein OS=Saccharomyces cerevisiae (strain ATCC 204508 / S288c) OX=559292 GN=TY3B-I PE=1 SV=2 && PF19259:Ty3 transposon capsid-like protein|PF17917:RNase H-like domain found in reverse transcriptase|PF17921:Integrase zinc binding domain|PF00078:Reverse transcriptase (RNA-dependent DNA polymerase)|PF00535:Glycosyl transfer…
gene_QJQ45_016799	3.03453	1.32e-27	GCY28_CAEEL	gcy-28	hypothetical protein && sp|Q86GV3|GCY28_CAEEL Receptor-type guanylate cyclase gcy-28 OS=Caenorhabditis elegans OX=6239 GN=gcy-28 PE=1 SV=1 && PF00211:Adenylate and Guanylate cyclase catalytic domain
gene_QJQ45_029268	-1.72773	1.42e-27	PGR5_ARATH	PGR5	hypothetical protein && sp|Q9SL05|PGR5_ARATH Protein PROTON GRADIENT REGULATION 5, chloroplastic OS=Arabidopsis thaliana OX=3702 GN=PGR5 PE=1 SV=1 && -
gene_QJQ45_011847	1.13194	1.61e-27	MRP4_HUMAN	ABCC4	hypothetical protein && sp|O15439|MRP4_HUMAN ATP-binding cassette sub-family C member 4 OS=Homo sapiens OX=9606 GN=ABCC4 PE=1 SV=3 && PF00005:ABC transporter|PF00664:ABC transporter transmembrane region
gene_QJQ45_028436	2.93743	2.3e-27	FTSH2_ORYSJ	FTSH2	hypothetical protein && sp|Q655S1|FTSH2_ORYSJ ATP-dependent zinc metalloprotease FTSH 2, chloroplastic OS=Oryza sativa subsp. japonica OX=39947 GN=FTSH2 PE=3 SV=1 && PF00004:ATPase family associated with various cellular activities (AAA)|PF01434:Peptidase family M41|PF17862:AAA+ lid domain
gene_QJQ45_023475	1.45606	2.58e-27	YU87_ARATH	#N/A	hypothetical protein && sp|O80832|YU87_ARATH UPF0187 protein At2g45870, chloroplastic OS=Arabidopsis thaliana OX=3702 GN=At2g45870 PE=2 SV=1 && PF01062:Bestrophin, RFP-TM, chloride channel
gene_QJQ45_007248	2.1379	6.06e-27	DEGP1_ARATH	DEGP1	hypothetical protein && sp|O22609|DEGP1_ARATH Protease Do-like 1, chloroplastic OS=Arabidopsis thaliana OX=3702 GN=DEGP1 PE=1 SV=2 && PF13365:Trypsin-like peptidase domain
gene_QJQ45_018307	4.38579	6.38e-27	TF212_SCHPO	Tf2-12	hypothetical protein && sp|P0CT41|TF212_SCHPO Transposon Tf2-12 polyprotein OS=Schizosaccharomyces pombe (strain 972 / ATCC 24843) OX=284812 GN=Tf2-12 PE=3 SV=1 && PF00385:Chromo (CHRromatin Organisation MOdifier) domain|PF17919:RNase H-like domain found in reverse transcriptase|PF00078:Reverse transcriptase (RNA-dependent DNA polymerase)|PF00665:Integrase core domain
gene_QJQ45_000015	1.13625	1.14e-26	CNX2_ARATH	CNX2	hypothetical protein && sp|Q39055|CNX2_ARATH GTP 3',8-cyclase, mitochondrial OS=Arabidopsis thaliana OX=3702 GN=CNX2 PE=1 SV=1 && PF04055:Radical SAM superfamily|PF06463:Molybdenum Cofactor Synthesis C
novel.828	3.27298	1.39e-26	Y027_MYCA9	#N/A	- && sp|B1ME65|Y027_MYCA9 Putative S-adenosyl-L-methionine-dependent methyltransferase MAB_0027c OS=Mycobacteroides abscessus (strain ATCC 19977 / DSM 44196 / CCUG 20993 / CIP 104536 / JCM 13569 / NCTC 13031 / TMC 1543 / L948) OX=561007 GN=MAB_0027c PE=3 SV=1 && PF04072:Leucine carboxyl methyltransferase
gene_QJQ45_009402	3.01762	2.38e-26	CTDS_DICDI	fcpA	hypothetical protein && sp|Q9XYL0|CTDS_DICDI Probable C-terminal domain small phosphatase OS=Dictyostelium discoideum OX=44689 GN=fcpA PE=3 SV=1 && PF03031:NLI interacting factor-like phosphatase
gene_QJQ45_019183	-1.31186	3.61e-26	RL223_ARATH	RPL22C	hypothetical protein && sp|Q9FE58|RL223_ARATH 60S ribosomal protein L22-3 OS=Arabidopsis thaliana OX=3702 GN=RPL22C PE=2 SV=1 && PF01776:Ribosomal L22e protein family
gene_QJQ45_029491	1.58758	4.2e-26	DHE3_VITVI	GDH	hypothetical protein && sp|P52596|DHE3_VITVI Glutamate dehydrogenase OS=Vitis vinifera OX=29760 GN=GDH PE=2 SV=1 && PF02812:Glu/Leu/Phe/Val dehydrogenase, dimerisation domain
gene_QJQ45_026612	1.37432	4.35e-26	KCY3_ARATH	UMK3	hypothetical protein && sp|O04905|KCY3_ARATH UMP-CMP kinase 3 OS=Arabidopsis thaliana OX=3702 GN=UMK3 PE=1 SV=1 && PF00406:Adenylate kinase
gene_QJQ45_015927	-1.40292	4.54e-26	KHSE_NITHX	thrB	hypothetical protein && sp|Q1QH29|KHSE_NITHX Homoserine kinase OS=Nitrobacter hamburgensis (strain DSM 10229 / NCIMB 13809 / X14) OX=323097 GN=thrB PE=3 SV=1 && PF01636:Phosphotransferase enzyme family
novel.2881	1.2174	5.33e-26	PSBS1_ORYSI	PSBS1	- && sp|A2WXD9|PSBS1_ORYSI Photosystem II 22 kDa protein 1, chloroplastic OS=Oryza sativa subsp. indica OX=39946 GN=PSBS1 PE=1 SV=1 && -
gene_QJQ45_029148	1.07698	7.26e-26	Y5390_ARATH	At5g03900	hypothetical protein && sp|Q8GW20|Y5390_ARATH Uncharacterized protein At5g03900, chloroplastic OS=Arabidopsis thaliana OX=3702 GN=At5g03900 PE=2 SV=2 && -
gene_QJQ45_020331	-1.56585	7.66e-26	DCVR_CUCSA	DVR	hypothetical protein && sp|J9RYI6|DCVR_CUCSA Divinyl chlorophyllide a 8-vinyl-reductase, chloroplastic OS=Cucumis sativus OX=3659 GN=DVR PE=1 SV=1 && PF13460:NAD(P)H-binding
gene_QJQ45_024701	-1.03914	8.52e-26	TLC1_ARATH	AATP1	hypothetical protein && sp|Q39002|TLC1_ARATH ADP,ATP carrier protein 1, chloroplastic OS=Arabidopsis thaliana OX=3702 GN=AATP1 PE=1 SV=2 && PF03219:TLC ATP/ADP transporter
gene_QJQ45_023105	-1.02571	1.1e-25	PSD1A_ARATH	RPN2A	hypothetical protein && sp|O48844|PSD1A_ARATH 26S proteasome non-ATPase regulatory subunit 1 homolog A OS=Arabidopsis thaliana OX=3702 GN=RPN2A PE=1 SV=1 && PF21505:26S proteasome subunit RPN2, N-terminal domain|PF18004:26S proteasome regulatory subunit RPN2 C-terminal domain
gene_QJQ45_028692	6.84308	1.13e-25	POL5_DROME	pol	hypothetical protein && sp|Q8I7P9|POL5_DROME Retrovirus-related Pol polyprotein from transposon opus OS=Drosophila melanogaster OX=7227 GN=pol PE=4 SV=1 && PF00078:Reverse transcriptase (RNA-dependent DNA polymerase)|PF17921:Integrase zinc binding domain|PF00188:Cysteine-rich secretory protein family
gene_QJQ45_025689	-3.75888	1.14e-25	VA0D2_ARATH	VHA-d2	hypothetical protein && sp|Q9LHA4|VA0D2_ARATH V-type proton ATPase subunit d2 OS=Arabidopsis thaliana OX=3702 GN=VHA-d2 PE=2 SV=1 && PF01992:ATP synthase (C/AC39) subunit
gene_QJQ45_020225	1.21637	1.21e-25	CYC1B_ARATH	CYC1-2	hypothetical protein && sp|Q9FKS5|CYC1B_ARATH Cytochrome c1 2, heme protein, mitochondrial OS=Arabidopsis thaliana OX=3702 GN=CYC1-2 PE=1 SV=1 && PF02167:Cytochrome C1 family
gene_QJQ45_025549	1.98253	1.81e-25	CP4F1_RAT	Cyp4f1	hypothetical protein && sp|P33274|CP4F1_RAT Cytochrome P450 4F1 OS=Rattus norvegicus OX=10116 GN=Cyp4f1 PE=1 SV=1 && PF00067:Cytochrome P450
gene_QJQ45_027871	-1.0309	1.89e-25	EHD1_ARATH	EHD1	hypothetical protein && sp|Q94CF0|EHD1_ARATH EH domain-containing protein 1 OS=Arabidopsis thaliana OX=3702 GN=EHD1 PE=1 SV=1 && PF16880:N-terminal EH-domain containing protein|PF00350:Dynamin family|PF18150:Domain of unknown function (DUF5600)
gene_QJQ45_028464	1.00696	3.26e-25	RFS2_ARATH	RFS2	hypothetical protein && sp|Q94A08|RFS2_ARATH Probable galactinol--sucrose galactosyltransferase 2 OS=Arabidopsis thaliana OX=3702 GN=RFS2 PE=2 SV=2 && PF05691:Raffinose synthase or seed imbibition protein Sip1
gene_QJQ45_018649	2.38445	3.69e-25	SSP1_SCHPO	ssp1	hypothetical protein && sp|P50526|SSP1_SCHPO Serine/threonine-protein kinase ssp1 OS=Schizosaccharomyces pombe (strain 972 / ATCC 24843) OX=284812 GN=ssp1 PE=1 SV=1 && PF00069:Protein kinase domain
gene_QJQ45_015592	-1.15084	4.44e-25	IMP3_SCHPO	imp3	hypothetical protein && sp|O13835|IMP3_SCHPO U3 small nucleolar ribonucleoprotein protein imp3 OS=Schizosaccharomyces pombe (strain 972 / ATCC 24843) OX=284812 GN=imp3 PE=3 SV=1 && PF00163:Ribosomal protein S4/S9 N-terminal domain|PF01479:S4 domain
gene_QJQ45_027975	-2.7759	4.76e-25	NHAAB_MONBE	37534	hypothetical protein && sp|A9V2C1|NHAAB_MONBE Probable nitrile hydratase OS=Monosiga brevicollis OX=81824 GN=37534 PE=3 SV=1 && PF02979:Nitrile hydratase, alpha chain|PF02211:Nitrile hydratase beta subunit, C-terminal|PF21006:Nitrile hydratase beta subunit, N-terminal
gene_QJQ45_026189	1.21772	6.78e-25	BLH11_ARATH	BLH11	hypothetical protein && sp|Q1PFD1|BLH11_ARATH BEL1-like homeodomain protein 11 OS=Arabidopsis thaliana OX=3702 GN=BLH11 PE=2 SV=1 && PF00331:Glycosyl hydrolase family 10|PF05920:Homeobox KN domain
gene_QJQ45_026423	-1.31616	7.27e-25	CTH1_CHLRE	CTH1	hypothetical protein && sp|Q9AR22|CTH1_CHLRE Magnesium-protoporphyrin IX monomethyl ester [oxidative] cyclase 2, chloroplastic OS=Chlamydomonas reinhardtii OX=3055 GN=CTH1 PE=2 SV=1 && PF02915:Rubrerythrin
gene_QJQ45_016759	-1.1802	7.87e-25	PPD3_ARATH	PPD3	hypothetical protein && sp|Q9S720|PPD3_ARATH PsbP domain-containing protein 3, chloroplastic OS=Arabidopsis thaliana OX=3702 GN=PPD3 PE=1 SV=2 && PF01789:PsbP
gene_QJQ45_024233	1.16514	9.2e-25	PLIP3_ARATH	PLIP3	hypothetical protein && sp|Q940L4|PLIP3_ARATH Phospholipase A1 PLIP3, chloroplastic OS=Arabidopsis thaliana OX=3702 GN=PLIP3 PE=1 SV=1 && -
gene_QJQ45_013790	1.1247	9.46e-25	MCATL_RAT	#N/A	hypothetical protein && sp|Q5HZE0|MCATL_RAT Mitochondrial basic amino acids transporter OS=Rattus norvegicus OX=10116 GN=Slc25a29 PE=2 SV=1 && PF00153:Mitochondrial carrier protein
gene_QJQ45_001058	-2.10417	1.53e-24	CAH1_CHLRE	CAH1	hypothetical protein && sp|P20507|CAH1_CHLRE Carbonic anhydrase 1 OS=Chlamydomonas reinhardtii OX=3055 GN=CAH1 PE=1 SV=1 && PF00194:Eukaryotic-type carbonic anhydrase
gene_QJQ45_020075	-1.26437	1.58e-24	MAN2_ORYSJ	#N/A	hypothetical protein && sp|Q0JJD4|MAN2_ORYSJ Mannan endo-1,4-beta-mannosidase 2 OS=Oryza sativa subsp. japonica OX=39947 GN=MAN2 PE=2 SV=2 && PF00150:Cellulase (glycosyl hydrolase family 5)
gene_QJQ45_007591	2.12678	2.09e-24	C97B3_ARATH	CYP97B3	hypothetical protein && sp|O23365|C97B3_ARATH Cytochrome P450 97B3, chloroplastic OS=Arabidopsis thaliana OX=3702 GN=CYP97B3 PE=1 SV=2 && PF00067:Cytochrome P450
gene_QJQ45_019697	1.09241	3.52e-24	YDBI_BACSU	ydbI	hypothetical protein && sp|P96604|YDBI_BACSU Putative transport protein YdbI OS=Bacillus subtilis (strain 168) OX=224308 GN=ydbI PE=3 SV=1 && PF01594:AI-2E family transporter
gene_QJQ45_015644	-2.10111	4.06e-24	GMPP1_ARATH	CYT1	hypothetical protein && sp|O22287|GMPP1_ARATH Mannose-1-phosphate guanylyltransferase 1 OS=Arabidopsis thaliana OX=3702 GN=CYT1 PE=1 SV=1 && PF00483:Nucleotidyl transferase
gene_QJQ45_028234	1.88525	5.25e-24	LPAAT_ORYSJ	Os09g0520200	hypothetical protein && sp|Q0J0A4|LPAAT_ORYSJ Probable 1-acylglycerol-3-phosphate O-acyltransferase OS=Oryza sativa subsp. japonica OX=39947 GN=Os09g0520200 PE=3 SV=3 && PF12697:Alpha/beta hydrolase family
gene_QJQ45_009959	1.77149	1.04e-23	RDH14_HUMAN	RDH14	hypothetical protein && sp|Q9HBH5|RDH14_HUMAN Retinol dehydrogenase 14 OS=Homo sapiens OX=9606 GN=RDH14 PE=1 SV=1 && PF00106:short chain dehydrogenase
gene_QJQ45_017730	4.14416	1.13e-23	NSUN2_CHICK	NSUN2	hypothetical protein && sp|Q5ZLV4|NSUN2_CHICK RNA cytosine-C(5)-methyltransferase NSUN2 OS=Gallus gallus OX=9031 GN=NSUN2 PE=2 SV=1 && PF01189:16S rRNA methyltransferase RsmB/F
gene_QJQ45_023528	-1.1514	1.65e-23	BADH2_ORYSI	#N/A	hypothetical protein && sp|B3VMC0|BADH2_ORYSI Betaine aldehyde dehydrogenase 2 OS=Oryza sativa subsp. indica OX=39946 GN=BADH2 PE=2 SV=1 && PF00171:Aldehyde dehydrogenase family
gene_QJQ45_004916	-1.10199	1.91e-23	GFA2_ARATH	GFA2	hypothetical protein && sp|Q8GWW8|GFA2_ARATH Chaperone protein dnaJ GFA2, mitochondrial OS=Arabidopsis thaliana OX=3702 GN=GFA2 PE=2 SV=1 && PF00226:DnaJ domain
gene_QJQ45_027829	1.09991	2.13e-23	HIUH_DANRE	urah	hypothetical protein && sp|Q06S87|HIUH_DANRE 5-hydroxyisourate hydrolase OS=Danio rerio OX=7955 GN=urah PE=1 SV=1 && PF00576:HIUase/Transthyretin family|PF09366:Protein of unknown function (DUF1997)|PF09349:OHCU decarboxylase
gene_QJQ45_013956	-1.81023	2.3e-23	PSBQ_CHLRE	PSBQ	hypothetical protein && sp|P12852|PSBQ_CHLRE Oxygen-evolving enhancer protein 3, chloroplastic OS=Chlamydomonas reinhardtii OX=3055 GN=PSBQ PE=1 SV=1 && PF05757:Oxygen evolving enhancer protein 3 (PsbQ)
gene_QJQ45_025607	1.13017	2.46e-23	Y2090_ARATH	At2g40090	hypothetical protein && sp|O04212|Y2090_ARATH Putative ABC1 protein At2g40090 OS=Arabidopsis thaliana OX=3702 GN=At2g40090 PE=2 SV=2 && PF14736:Protein N-terminal asparagine amidohydrolase|PF03109:ABC1 atypical kinase-like domain
novel.7233	2.60075	2.67e-23	AB1C_ARATH	ABCC1	- && sp|Q9C8G9|AB1C_ARATH ABC transporter C family member 1 OS=Arabidopsis thaliana OX=3702 GN=ABCC1 PE=1 SV=1 && PF00005:ABC transporter
gene_QJQ45_001684	2.27076	2.87e-23	DHRSX_MOUSE	Dhrsx	hypothetical protein && sp|Q8VBZ0|DHRSX_MOUSE Dehydrogenase/reductase SDR family member on chromosome X homolog OS=Mus musculus OX=10090 GN=Dhrsx PE=1 SV=2 && PF00106:short chain dehydrogenase
gene_QJQ45_024351	-2.78054	5.54e-23	GSA_CHLRE	GSA	hypothetical protein && sp|Q39566|GSA_CHLRE Glutamate-1-semialdehyde 2,1-aminomutase, chloroplastic OS=Chlamydomonas reinhardtii OX=3055 GN=GSA PE=2 SV=1 && -
gene_QJQ45_015077	-1.58793	6.18e-23	RBS1_CHLRE	RBCS1	hypothetical protein && sp|P00873|RBS1_CHLRE Ribulose bisphosphate carboxylase small subunit, chloroplastic 1 OS=Chlamydomonas reinhardtii OX=3055 GN=RBCS1 PE=1 SV=1 && PF00101:Ribulose bisphosphate carboxylase, small chain
gene_QJQ45_027539	1.20439	9.19e-23	MRP1_BOVIN	ABCC1	hypothetical protein && sp|Q8HXQ5|MRP1_BOVIN Multidrug resistance-associated protein 1 OS=Bos taurus OX=9913 GN=ABCC1 PE=1 SV=1 && PF00664:ABC transporter transmembrane region|PF00005:ABC transporter
novel.1027	5.98594	1.15e-22	PSBS1_ORYSI	PSBS1	- && sp|A2WXD9|PSBS1_ORYSI Photosystem II 22 kDa protein 1, chloroplastic OS=Oryza sativa subsp. indica OX=39946 GN=PSBS1 PE=1 SV=1 && -
gene_QJQ45_026633	-1.06507	1.37e-22	ABCG1_HUMAN	ABCG1	hypothetical protein && sp|P45844|ABCG1_HUMAN ATP-binding cassette sub-family G member 1 OS=Homo sapiens OX=9606 GN=ABCG1 PE=1 SV=3 && PF00005:ABC transporter|PF01061:ABC-2 type transporter|PF19055:ABC-2 type transporter
gene_QJQ45_026300	-1.21087	1.48e-22	CHLM_ARATH	CHLM	hypothetical protein && sp|Q9SW18|CHLM_ARATH Magnesium protoporphyrin IX methyltransferase, chloroplastic OS=Arabidopsis thaliana OX=3702 GN=CHLM PE=1 SV=1 && PF07109:Magnesium-protoporphyrin IX methyltransferase C-terminus
gene_QJQ45_029142	1.02552	1.73e-22	MAK3_ARATH	MAK3	hypothetical protein && sp|O80438|MAK3_ARATH N-alpha-acetyltransferase MAK3 OS=Arabidopsis thaliana OX=3702 GN=MAK3 PE=1 SV=1 && PF00583:Acetyltransferase (GNAT) family|PF00481:Protein phosphatase 2C
gene_QJQ45_022591	-1.22271	1.94e-22	SSY4_ARATH	SS4	hypothetical protein && sp|Q0WVX5|SSY4_ARATH Probable starch synthase 4, chloroplastic/amyloplastic OS=Arabidopsis thaliana OX=3702 GN=SS4 PE=1 SV=1 && PF08323:Starch synthase catalytic domain|PF00534:Glycosyl transferases group 1
gene_QJQ45_030310	1.55986	2.1e-22	CCD8A_ORYSJ	CCD8A	hypothetical protein && sp|Q93VD5|CCD8A_ORYSJ Carotenoid cleavage dioxygenase 8 homolog A, chloroplastic OS=Oryza sativa subsp. japonica OX=39947 GN=CCD8A PE=2 SV=1 && PF03055:Retinal pigment epithelial membrane protein
gene_QJQ45_023745	-1.22558	2.16e-22	YNBB_BACSU	ynbB	hypothetical protein && sp|P94479|YNBB_BACSU Uncharacterized protein YnbB OS=Bacillus subtilis (strain 168) OX=224308 GN=ynbB PE=4 SV=2 && PF06838:Methionine gamma-lyase
gene_QJQ45_021001	-2.1133	2.21e-22	PRXQ_GENTR	AFP1	hypothetical protein && sp|Q75SY5|PRXQ_GENTR Peroxiredoxin Q, chloroplastic OS=Gentiana triflora OX=55190 GN=AFP1 PE=2 SV=1 && PF00578:AhpC/TSA family
novel.4570	3.22351	2.42e-22	XYN6_PYRGI	#N/A	- && sp|Q8NJ73|XYN6_PYRGI Endo-1,4-beta-xylanase 6 OS=Pyricularia grisea OX=148305 GN=XYL6 PE=1 SV=1 && PF00331:Glycosyl hydrolase family 10
gene_QJQ45_024526	1.75141	2.56e-22	IMCL1_ORYSJ	IMCEL1	hypothetical protein && sp|Q5Z9I2|IMCL1_ORYSJ Probable isoprenylcysteine alpha-carbonyl methylesterase ICMEL1 OS=Oryza sativa subsp. japonica OX=39947 GN=IMCEL1 PE=2 SV=1 && PF20434:BD-FAE
gene_QJQ45_016825	-1.22422	2.65e-22	SQD2_ARATH	SQD2	hypothetical protein && sp|Q8S4F6|SQD2_ARATH Sulfoquinovosyl transferase SQD2 OS=Arabidopsis thaliana OX=3702 GN=SQD2 PE=1 SV=1 && PF13692:Glycosyl transferases group 1|PF13439:Glycosyltransferase Family 4
gene_QJQ45_016795	-1.26202	3.44e-22	FRI3_ARATH	FER3	hypothetical protein && sp|Q9LYN2|FRI3_ARATH Ferritin-3, chloroplastic OS=Arabidopsis thaliana OX=3702 GN=FER3 PE=1 SV=1 && PF00210:Ferritin-like domain
gene_QJQ45_017465	2.43577	4.06e-22	TEKT_CHLRE	CHLREDRAFT_24358	hypothetical protein && sp|A8J8F6|TEKT_CHLRE Tektin OS=Chlamydomonas reinhardtii OX=3055 GN=CHLREDRAFT_24358 PE=1 SV=1 && PF03148:Tektin family
gene_QJQ45_024109	2.91694	7.27e-22	TULP_DROGR	king-tubby	hypothetical protein && sp|B4J6R7|TULP_DROGR Protein king tubby OS=Drosophila grimshawi OX=7222 GN=king-tubby PE=3 SV=1 && PF05699:hAT family C-terminal dimerisation region|PF01167:Tub family
novel.1542	5.42038	1.32e-21	PSBS1_CHLRE	PSBS1	- && sp|A8HPM2|PSBS1_CHLRE Photosystem II protein PSBS1 OS=Chlamydomonas reinhardtii OX=3055 GN=PSBS1 PE=1 SV=1 && -
gene_QJQ45_027683	1.05386	1.87e-21	ALIS5_ARATH	ALIS5	hypothetical protein && sp|Q8L8W0|ALIS5_ARATH ALA-interacting subunit 5 OS=Arabidopsis thaliana OX=3702 GN=ALIS5 PE=1 SV=1 && PF03381:LEM3 (ligand-effect modulator 3) family / CDC50 family
gene_QJQ45_013760	1.16446	2e-21	PHR_ARATH	PHR1	hypothetical protein && sp|Q9SB00|PHR_ARATH Deoxyribodipyrimidine photo-lyase OS=Arabidopsis thaliana OX=3702 GN=PHR1 PE=2 SV=1 && PF00875:DNA photolyase
gene_QJQ45_025255	1.52958	2.39e-21	SPPA1_ARATH	SPPA	hypothetical protein && sp|Q9C9C0|SPPA1_ARATH Serine protease SPPA, chloroplastic OS=Arabidopsis thaliana OX=3702 GN=SPPA PE=2 SV=1 && PF01343:Peptidase family S49
gene_QJQ45_019757	1.17613	2.88e-21	HPPD_PLESU	#N/A	hypothetical protein && sp|Q9ARF9|HPPD_PLESU 4-hydroxyphenylpyruvate dioxygenase OS=Plectranthus scutellarioides OX=4142 PE=2 SV=1 && -
gene_QJQ45_015453	2.04551	3.04e-21	GCAT_AERHY	#N/A	hypothetical protein && sp|P10480|GCAT_AERHY Phosphatidylcholine-sterol acyltransferase OS=Aeromonas hydrophila OX=644 PE=1 SV=3 && PF00657:GDSL-like Lipase/Acylhydrolase
gene_QJQ45_004047	1.43529	4.66e-21	FAAH_ARATH	FAAH	hypothetical protein && sp|Q7XJJ7|FAAH_ARATH Fatty acid amide hydrolase OS=Arabidopsis thaliana OX=3702 GN=FAAH PE=1 SV=1 && PF01425:Amidase
gene_QJQ45_024998	-1.17275	5.7e-21	PPD3_ARATH	PPD3	hypothetical protein && sp|Q9S720|PPD3_ARATH PsbP domain-containing protein 3, chloroplastic OS=Arabidopsis thaliana OX=3702 GN=PPD3 PE=1 SV=2 && PF20928:PsbP, C-terminal|PF01789:PsbP
gene_QJQ45_019556	-1.00777	5.8e-21	BUP1_ARATH	PYD3	hypothetical protein && sp|Q8H183|BUP1_ARATH Beta-ureidopropionase OS=Arabidopsis thaliana OX=3702 GN=PYD3 PE=1 SV=1 && PF00795:Carbon-nitrogen hydrolase
gene_QJQ45_020173	3.19842	1.3e-20	CTDS_DICDI	fcpA	hypothetical protein && sp|Q9XYL0|CTDS_DICDI Probable C-terminal domain small phosphatase OS=Dictyostelium discoideum OX=44689 GN=fcpA PE=3 SV=1 && PF03031:NLI interacting factor-like phosphatase
gene_QJQ45_024447	1.10511	1.42e-20	DDX10_CHICK	#N/A	hypothetical protein && sp|Q5ZJF6|DDX10_CHICK Probable ATP-dependent RNA helicase DDX10 OS=Gallus gallus OX=9031 GN=DDX10 PE=2 SV=1 && PF13959:Domain of unknown function (DUF4217)|PF00394:Multicopper oxidase|PF07731:Multicopper oxidase|PF00270:DEAD/DEAH box helicase|PF00271:Helicase conserved C-terminal domain|PF07732:Multicopper oxidase
gene_QJQ45_015668	-1.29995	2.44e-20	PDC1_ORYSJ	PDC1	hypothetical protein && sp|Q0DHF6|PDC1_ORYSJ Pyruvate decarboxylase 1 OS=Oryza sativa subsp. japonica OX=39947 GN=PDC1 PE=2 SV=1 && PF00205:Thiamine pyrophosphate enzyme, central domain|PF02776:Thiamine pyrophosphate enzyme, N-terminal TPP binding domain|PF02775:Thiamine pyrophosphate enzyme, C-terminal TPP binding domain
gene_QJQ45_015069	1.50573	3.03e-20	CBR_DUNSA	CBR	hypothetical protein && sp|P27516|CBR_DUNSA Carotene biosynthesis-related protein CBR, chloroplastic OS=Dunaliella salina OX=3046 GN=CBR PE=1 SV=1 && -
gene_QJQ45_014796	1.11397	3.42e-20	PIMT2_ARATH	PIMT2	hypothetical protein && sp|Q64J17|PIMT2_ARATH Protein-L-isoaspartate O-methyltransferase 2 OS=Arabidopsis thaliana OX=3702 GN=PIMT2 PE=1 SV=1 && PF01135:Protein-L-isoaspartate(D-aspartate) O-methyltransferase (PCMT)
gene_QJQ45_015799	1.38668	3.99e-20	ALIS5_ARATH	ALIS5	hypothetical protein && sp|Q8L8W0|ALIS5_ARATH ALA-interacting subunit 5 OS=Arabidopsis thaliana OX=3702 GN=ALIS5 PE=1 SV=1 && PF03381:LEM3 (ligand-effect modulator 3) family / CDC50 family
gene_QJQ45_021738	1.10297	5.65e-20	AB14G_ARATH	ABCG14	hypothetical protein && sp|Q9C6W5|AB14G_ARATH ABC transporter G family member 14 OS=Arabidopsis thaliana OX=3702 GN=ABCG14 PE=1 SV=1 && PF01061:ABC-2 type transporter
gene_QJQ45_003178	1.57985	5.69e-20	DNAJ_OCEIH	dnaJ	hypothetical protein && sp|Q8CXD3|DNAJ_OCEIH Chaperone protein DnaJ OS=Oceanobacillus iheyensis (strain DSM 14371 / CIP 107618 / JCM 11309 / KCTC 3954 / HTE831) OX=221109 GN=dnaJ PE=3 SV=1 && PF00226:DnaJ domain
gene_QJQ45_021007	-1.39013	8.84e-20	P4H8_ARATH	P4H8	hypothetical protein && sp|F4JNU8|P4H8_ARATH Probable prolyl 4-hydroxylase 8 OS=Arabidopsis thaliana OX=3702 GN=P4H8 PE=3 SV=1 && -
novel.1636	1.23616	1.61e-19	MAN5_ORYSJ	MAN5	- && sp|Q5W6G0|MAN5_ORYSJ Putative mannan endo-1,4-beta-mannosidase 5 OS=Oryza sativa subsp. japonica OX=39947 GN=MAN5 PE=2 SV=2 && -
novel.1339	1.47885	2.19e-19	PRY3_YEAST	PRY3	- && sp|P47033|PRY3_YEAST Cell wall protein PRY3 OS=Saccharomyces cerevisiae (strain ATCC 204508 / S288c) OX=559292 GN=PRY3 PE=1 SV=1 && -
gene_QJQ45_024240	-1.2474	2.97e-19	BUP1_ARATH	PYD3	hypothetical protein && sp|Q8H183|BUP1_ARATH Beta-ureidopropionase OS=Arabidopsis thaliana OX=3702 GN=PYD3 PE=1 SV=1 && PF00795:Carbon-nitrogen hydrolase
gene_QJQ45_007882	1.26623	3.08e-19	PHR_ARATH	PHR1	hypothetical protein && sp|Q9SB00|PHR_ARATH Deoxyribodipyrimidine photo-lyase OS=Arabidopsis thaliana OX=3702 GN=PHR1 PE=2 SV=1 && -
gene_QJQ45_002354	-1.12869	3.48e-19	PAM71_ARATH	PAM71	hypothetical protein && sp|Q94AX5|PAM71_ARATH Protein PAM71, chloroplastic OS=Arabidopsis thaliana OX=3702 GN=PAM71 PE=1 SV=2 && PF01169:Uncharacterized protein family UPF0016
gene_QJQ45_002632	-1.24052	4.07e-19	TF212_SCHPO	Tf2-12	hypothetical protein && sp|P0CT41|TF212_SCHPO Transposon Tf2-12 polyprotein OS=Schizosaccharomyces pombe (strain 972 / ATCC 24843) OX=284812 GN=Tf2-12 PE=3 SV=1 && PF17917:RNase H-like domain found in reverse transcriptase|PF00385:Chromo (CHRromatin Organisation MOdifier) domain|PF07137:VDE lipocalin domain|PF00078:Reverse transcriptase (RNA-dependent DNA polymerase)|PF17921:Integrase zinc bindin…
gene_QJQ45_025052	-2.42206	4.09e-19	HS16A_WHEAT	hsp16.9A	hypothetical protein && sp|P12810|HS16A_WHEAT 16.9 kDa class I heat shock protein 1 OS=Triticum aestivum OX=4565 GN=hsp16.9A PE=2 SV=1 && PF00011:Hsp20/alpha crystallin family
gene_QJQ45_018875	-1.65906	5.33e-19	PGR5_ARATH	PGR5	hypothetical protein && sp|Q9SL05|PGR5_ARATH Protein PROTON GRADIENT REGULATION 5, chloroplastic OS=Arabidopsis thaliana OX=3702 GN=PGR5 PE=1 SV=1 && -
gene_QJQ45_018005	-1.35244	8.77e-19	SSY4_ARATH	SS4	hypothetical protein && sp|Q0WVX5|SSY4_ARATH Probable starch synthase 4, chloroplastic/amyloplastic OS=Arabidopsis thaliana OX=3702 GN=SS4 PE=1 SV=1 && PF00534:Glycosyl transferases group 1|PF08323:Starch synthase catalytic domain
gene_QJQ45_014067	-1.61289	9.9e-19	FAD3D_ARATH	FAD8	hypothetical protein && sp|P48622|FAD3D_ARATH Temperature-sensitive sn-2 acyl-lipid omega-3 desaturase (ferredoxin), chloroplastic OS=Arabidopsis thaliana OX=3702 GN=FAD8 PE=1 SV=1 && PF00487:Fatty acid desaturase
gene_QJQ45_027708	-1.14197	1e-18	SRRM2_MOUSE	Srrm2	hypothetical protein && sp|Q8BTI8|SRRM2_MOUSE Serine/arginine repetitive matrix protein 2 OS=Mus musculus OX=10090 GN=Srrm2 PE=1 SV=3 && -
gene_QJQ45_008675	1.03064	1.63e-18	SDR1_ARATH	#N/A	hypothetical protein && sp|Q9M2E2|SDR1_ARATH (+)-neomenthol dehydrogenase OS=Arabidopsis thaliana OX=3702 GN=SDR1 PE=1 SV=1 && PF00106:short chain dehydrogenase
gene_QJQ45_028081	-1.10904	1.63e-18	KCS6_ARATH	CUT1	hypothetical protein && sp|Q9XF43|KCS6_ARATH 3-ketoacyl-CoA synthase 6 OS=Arabidopsis thaliana OX=3702 GN=CUT1 PE=1 SV=1 && PF08392:FAE1/Type III polyketide synthase-like protein
gene_QJQ45_019504	1.60537	1.68e-18	TULP_DROGR	king-tubby	hypothetical protein && sp|B4J6R7|TULP_DROGR Protein king tubby OS=Drosophila grimshawi OX=7222 GN=king-tubby PE=3 SV=1 && PF01167:Tub family
gene_QJQ45_016766	1.46661	1.84e-18	Y2446_ARATH	At2g34460	hypothetical protein && sp|Q8H124|Y2446_ARATH Uncharacterized protein At2g34460, chloroplastic OS=Arabidopsis thaliana OX=3702 GN=At2g34460 PE=1 SV=1 && PF13460:NAD(P)H-binding
gene_QJQ45_010721	-1.03042	2.08e-18	PSAL_CUCSA	PSAL	hypothetical protein && sp|Q39654|PSAL_CUCSA Photosystem I reaction center subunit XI, chloroplastic OS=Cucumis sativus OX=3659 GN=PSAL PE=2 SV=1 && PF02605:Photosystem I reaction centre subunit XI
gene_QJQ45_026327	3.15075	2.46e-18	PHO4_NEUCR	pho-4	hypothetical protein && sp|P15710|PHO4_NEUCR Phosphate-repressible phosphate permease pho-4 OS=Neurospora crassa (strain ATCC 24698 / 74-OR23-1A / CBS 708.71 / DSM 1257 / FGSC 987) OX=367110 GN=pho-4 PE=1 SV=1 && PF01384:Phosphate transporter family
novel.7596	-1.18466	7.76e-18	GAPR1_HUMAN	GLIPR2	- && sp|Q9H4G4|GAPR1_HUMAN Golgi-associated plant pathogenesis-related protein 1 OS=Homo sapiens OX=9606 GN=GLIPR2 PE=1 SV=3 && -
novel.7038	2.24093	9.52e-18	YQAB_ECOLI	yqaB	- && sp|P77475|YQAB_ECOLI Fructose-1-phosphate phosphatase YqaB OS=Escherichia coli (strain K12) OX=83333 GN=yqaB PE=1 SV=1 && -
gene_QJQ45_020908	1.04105	1.39e-17	DTX43_ARATH	DTX43	hypothetical protein && sp|Q9SFB0|DTX43_ARATH Protein DETOXIFICATION 43 OS=Arabidopsis thaliana OX=3702 GN=DTX43 PE=1 SV=1 && PF01554:MatE
gene_QJQ45_009041	-1.28104	1.75e-17	FRI3_ARATH	FER3	hypothetical protein && sp|Q9LYN2|FRI3_ARATH Ferritin-3, chloroplastic OS=Arabidopsis thaliana OX=3702 GN=FER3 PE=1 SV=1 && PF00210:Ferritin-like domain
gene_QJQ45_010171	-2.90559	2.44e-17	GLOX_VITPS	GLOX	hypothetical protein && sp|Q3HRQ2|GLOX_VITPS Aldehyde oxidase GLOX OS=Vitis pseudoreticulata OX=231512 GN=GLOX PE=2 SV=1 && PF07250:Glyoxal oxidase N-terminus|PF09118:Galactose oxidase-like, Early set domain
gene_QJQ45_016837	1.51476	2.55e-17	Y5573_ARATH	At2g04300	hypothetical protein && sp|Q9SI06|Y5573_ARATH Putative leucine-rich repeat receptor-like serine/threonine-protein kinase At2g04300 OS=Arabidopsis thaliana OX=3702 GN=At2g04300 PE=3 SV=2 && PF07714:Protein tyrosine and serine/threonine kinase
gene_QJQ45_026144	1.01028	2.64e-17	POLX_TOBAC	#N/A	hypothetical protein && sp|P10978|POLX_TOBAC Retrovirus-related Pol polyprotein from transposon TNT 1-94 OS=Nicotiana tabacum OX=4097 PE=2 SV=1 && PF00665:Integrase core domain|PF01425:Amidase|PF13532:2OG-Fe(II) oxygenase superfamily|PF07727:Reverse transcriptase (RNA-dependent DNA polymerase)|PF14223:gag-polypeptide of LTR copia-type
gene_QJQ45_025478	1.65522	5.13e-17	PLIP1_ARATH	PLIP1	hypothetical protein && sp|Q7Y220|PLIP1_ARATH Phospholipase A1 PLIP1, chloroplastic OS=Arabidopsis thaliana OX=3702 GN=PLIP1 PE=1 SV=1 && PF01764:Lipase (class 3)
novel.1157	1.62382	6.34e-17	KNOS9_ORYSJ	#N/A	- && sp|Q10EC6|KNOS9_ORYSJ Homeobox protein knotted-1-like 9 OS=Oryza sativa subsp. japonica OX=39947 GN=Os03g0772100 PE=3 SV=2 && -
gene_QJQ45_016424	1.40344	6.79e-17	TEB_ARATH	TEB	hypothetical protein && sp|Q588V7|TEB_ARATH Helicase and polymerase-containing protein TEBICHI OS=Arabidopsis thaliana OX=3702 GN=TEB PE=2 SV=1 && PF00270:DEAD/DEAH box helicase|PF20470:Helix-turn-helix domain|PF00476:DNA polymerase family A|PF21099:DNA_pol_Q helicase like region helical domain
gene_QJQ45_021979	1.18344	9.64e-17	ACDH_ARATH	At4g39670	hypothetical protein && sp|Q8L7U7|ACDH_ARATH ACD11 homolog protein OS=Arabidopsis thaliana OX=3702 GN=At4g39670 PE=2 SV=1 && PF08718:Glycolipid transfer protein (GLTP)
gene_QJQ45_025015	-1.39409	1.05e-16	UAPA_EMENI	uapA	hypothetical protein && sp|Q07307|UAPA_EMENI Uric acid-xanthine permease OS=Emericella nidulans (strain FGSC A4 / ATCC 38163 / CBS 112.46 / NRRL 194 / M139) OX=227321 GN=uapA PE=1 SV=3 && PF00860:Permease family
gene_QJQ45_014759	1.07886	1.4e-16	TF212_SCHPO	Tf2-12	hypothetical protein && sp|P0CT41|TF212_SCHPO Transposon Tf2-12 polyprotein OS=Schizosaccharomyces pombe (strain 972 / ATCC 24843) OX=284812 GN=Tf2-12 PE=3 SV=1 && PF17921:Integrase zinc binding domain|PF03828:Cid1 family poly A polymerase|PF00385:Chromo (CHRromatin Organisation MOdifier) domain|PF00078:Reverse transcriptase (RNA-dependent DNA polymerase)|PF17917:RNase H-like domain found in reve…
gene_QJQ45_021815	1.14655	1.51e-16	ACDH_ARATH	At4g39670	hypothetical protein && sp|Q8L7U7|ACDH_ARATH ACD11 homolog protein OS=Arabidopsis thaliana OX=3702 GN=At4g39670 PE=2 SV=1 && PF08718:Glycolipid transfer protein (GLTP)
gene_QJQ45_020577	3.48564	1.7e-16	FLTOP_CHLRE	CFAP126	hypothetical protein && sp|A8IVJ1|FLTOP_CHLRE Protein Flattop homolog OS=Chlamydomonas reinhardtii OX=3055 GN=CFAP126 PE=1 SV=1 && -
gene_QJQ45_001207	-1.09302	1.98e-16	CMFB_DICDI	cmfB	hypothetical protein && sp|Q9U641|CMFB_DICDI Conditioned medium factor receptor 1 OS=Dictyostelium discoideum OX=44689 GN=cmfB PE=1 SV=1 && -
gene_QJQ45_016556	2.75496	2.61e-16	POLX_TOBAC	#N/A	hypothetical protein && sp|P10978|POLX_TOBAC Retrovirus-related Pol polyprotein from transposon TNT 1-94 OS=Nicotiana tabacum OX=4097 PE=2 SV=1 && PF13976:GAG-pre-integrase domain|PF00665:Integrase core domain|PF14223:gag-polypeptide of LTR copia-type|PF07727:Reverse transcriptase (RNA-dependent DNA polymerase)
gene_QJQ45_026279	-1.04771	2.71e-16	METC_LACLA	#N/A	hypothetical protein && sp|P0A4K2|METC_LACLA Cystathionine beta-lyase OS=Lactococcus lactis subsp. lactis (strain IL1403) OX=272623 GN=metC PE=3 SV=1 && PF01053:Cys/Met metabolism PLP-dependent enzyme
gene_QJQ45_016199	1.05402	2.81e-16	PXL2A_XENLA	#N/A	hypothetical protein && sp|Q641F0|PXL2A_XENLA Peroxiredoxin-like 2A OS=Xenopus laevis OX=8355 GN=prxl2a PE=2 SV=2 && PF13911:AhpC/TSA antioxidant enzyme
gene_QJQ45_017110	-1.31744	3.71e-16	FER_CHLRE	PETF	hypothetical protein && sp|P07839|FER_CHLRE Ferredoxin, chloroplastic OS=Chlamydomonas reinhardtii OX=3055 GN=PETF PE=1 SV=2 && PF00111:2Fe-2S iron-sulfur cluster binding domain
gene_QJQ45_021542	-1.36939	3.73e-16	ZNFX1_MOUSE	Znfx1	hypothetical protein && sp|Q8R151|ZNFX1_MOUSE NFX1-type zinc finger-containing protein 1 OS=Mus musculus OX=10090 GN=Znfx1 PE=1 SV=3 && PF13087:AAA domain|PF00004:ATPase family associated with various cellular activities (AAA)|PF13086:AAA domain
gene_QJQ45_028759	-1.08552	9.45e-16	DYH7_RAT	Dnah7	hypothetical protein && sp|Q63170|DYH7_RAT Dynein axonemal heavy chain 7 OS=Rattus norvegicus OX=10116 GN=Dnah7 PE=2 SV=2 && PF12781:ATP-binding dynein motor region|PF03028:Dynein heavy chain region D6 P-loop domain|PF18198:Dynein heavy chain AAA lid domain|PF12780:P-loop containing dynein motor region D4|PF12777:Microtubule-binding stalk of dynein motor|PF12775:P-loop containing dynein motor reg…
gene_QJQ45_028971	-1.4569	9.57e-16	Y812_METJA	MJ0812	hypothetical protein && sp|Q58222|Y812_METJA Uncharacterized protein MJ0812 OS=Methanocaldococcus jannaschii (strain ATCC 43067 / DSM 2661 / JAL-1 / JCM 10045 / NBRC 100440) OX=243232 GN=MJ0812 PE=4 SV=1 && PF17868:AAA lid domain|PF20030:MoxR domain in the MoxR-vWA-beta-propeller ternary systems
novel.4942	-1.14942	1.56e-15	RITF1_ARATH	RITF1	- && sp|Q1G3Q4|RITF1_ARATH Protein RGF1 INDUCIBLE TRANSCRIPTION FACTOR 1 OS=Arabidopsis thaliana OX=3702 GN=RITF1 PE=1 SV=1 && -
gene_QJQ45_008916	1.08534	1.89e-15	H32_BOVIN	#N/A	hypothetical protein && sp|P84227|H32_BOVIN Histone H3.2 OS=Bos taurus OX=9913 PE=1 SV=2 && PF00125:Core histone H2A/H2B/H3/H4
gene_QJQ45_024695	2.03959	2.01e-15	HIR1_ORYSJ	HIR1	hypothetical protein && sp|Q6ZIV7|HIR1_ORYSJ Hypersensitive-induced response protein 1 OS=Oryza sativa subsp. japonica OX=39947 GN=HIR1 PE=1 SV=1 && PF01145:SPFH domain / Band 7 family
gene_QJQ45_007955	1.7666	2.18e-15	LPPD_ARATH	LPPD	hypothetical protein && sp|Q9M2G7|LPPD_ARATH Lipid phosphate phosphatase delta OS=Arabidopsis thaliana OX=3702 GN=LPPD PE=2 SV=1 && -
gene_QJQ45_026564	1.28205	2.27e-15	KCY3_ARATH	UMK3	hypothetical protein && sp|O04905|KCY3_ARATH UMP-CMP kinase 3 OS=Arabidopsis thaliana OX=3702 GN=UMK3 PE=1 SV=1 && PF00406:Adenylate kinase
gene_QJQ45_004693	-1.15222	3.02e-15	LTD_ARATH	LTD	hypothetical protein && sp|Q8VY88|LTD_ARATH Protein LHCP TRANSLOCATION DEFECT OS=Arabidopsis thaliana OX=3702 GN=LTD PE=1 SV=1 && PF14953:Domain of unknown function (DUF4504)
gene_QJQ45_006392	-1.10876	3.27e-15	ALB31_CHLRE	ALB3.1	hypothetical protein && sp|Q8S339|ALB31_CHLRE Inner membrane ALBINO3-like protein 1, chloroplastic OS=Chlamydomonas reinhardtii OX=3055 GN=ALB3.1 PE=3 SV=1 && PF02096:60Kd inner membrane protein
gene_QJQ45_017655	1.4778	3.6e-15	CALS6_ARATH	CALS6	hypothetical protein && sp|Q9LYS6|CALS6_ARATH Putative callose synthase 6 OS=Arabidopsis thaliana OX=3702 GN=CALS6 PE=3 SV=2 && PF02364:1,3-beta-glucan synthase component
gene_QJQ45_014397	1.40734	4.22e-15	DPOD4_BOVIN	POLD4	hypothetical protein && sp|Q3T0X9|DPOD4_BOVIN DNA polymerase delta subunit 4 OS=Bos taurus OX=9913 GN=POLD4 PE=1 SV=1 && PF04081:DNA polymerase delta, subunit 4
gene_QJQ45_015318	-1.32886	4.83e-15	TLC1_ARATH	AATP1	hypothetical protein && sp|Q39002|TLC1_ARATH ADP,ATP carrier protein 1, chloroplastic OS=Arabidopsis thaliana OX=3702 GN=AATP1 PE=1 SV=2 && PF03219:TLC ATP/ADP transporter
novel.8562	1.24292	6e-15	TOM1_TOBAC	TOM1	- && sp|Q402F4|TOM1_TOBAC Tobamovirus multiplication protein 1 OS=Nicotiana tabacum OX=4097 GN=TOM1 PE=1 SV=1 && PF00170:bZIP transcription factor
novel.5541	1.27818	6.09e-15	DPOLQ_MOUSE	Polq	- && sp|Q8CGS6|DPOLQ_MOUSE DNA polymerase theta OS=Mus musculus OX=10090 GN=Polq PE=1 SV=2 && PF00476:DNA polymerase family A
gene_QJQ45_019190	1.27939	6.23e-15	MGDG_TOBAC	MGD A	hypothetical protein && sp|Q9FZL3|MGDG_TOBAC Probable monogalactosyldiacylglycerol synthase, chloroplastic OS=Nicotiana tabacum OX=4097 GN=MGD A PE=2 SV=1 && PF06925:Monogalactosyldiacylglycerol (MGDG) synthase|PF04101:Glycosyltransferase family 28 C-terminal domain
gene_QJQ45_020511	-1.21804	8.32e-15	APR3_ARATH	APR3	hypothetical protein && sp|P92980|APR3_ARATH 5'-adenylylsulfate reductase 3, chloroplastic OS=Arabidopsis thaliana OX=3702 GN=APR3 PE=2 SV=2 && PF01507:Phosphoadenosine phosphosulfate reductase family|PF00085:Thioredoxin
gene_QJQ45_015628	1.41015	9.53e-15	DA1_ARATH	DA1	hypothetical protein && sp|P0C7Q8|DA1_ARATH Protein DA1 OS=Arabidopsis thaliana OX=3702 GN=DA1 PE=1 SV=1 && PF00078:Reverse transcriptase (RNA-dependent DNA polymerase)|PF12315:Protein DA1|PF00069:Protein kinase domain|PF17921:Integrase zinc binding domain|PF17917:RNase H-like domain found in reverse transcriptase
gene_QJQ45_023065	1.53076	1.01e-14	Y2987_NOSS1	alr2987	hypothetical protein && sp|Q8YSU5|Y2987_NOSS1 UPF0187 protein alr2987 OS=Nostoc sp. (strain PCC 7120 / SAG 25.82 / UTEX 2576) OX=103690 GN=alr2987 PE=3 SV=1 && PF01062:Bestrophin, RFP-TM, chloride channel
gene_QJQ45_011201	3.22305	1.02e-14	POLR1_ARATH	RE1	hypothetical protein && sp|Q94HW2|POLR1_ARATH Retrovirus-related Pol polyprotein from transposon RE1 OS=Arabidopsis thaliana OX=3702 GN=RE1 PE=2 SV=1 && PF13976:GAG-pre-integrase domain|PF00665:Integrase core domain|PF14223:gag-polypeptide of LTR copia-type|PF07727:Reverse transcriptase (RNA-dependent DNA polymerase)
gene_QJQ45_021331	1.50028	1.23e-14	MOK_HUMAN	MOK	hypothetical protein && sp|Q9UQ07|MOK_HUMAN MAPK/MAK/MRK overlapping kinase OS=Homo sapiens OX=9606 GN=MOK PE=2 SV=1 && PF00069:Protein kinase domain
gene_QJQ45_024558	-1.2746	1.28e-14	FER_CHLRE	PETF	hypothetical protein && sp|P07839|FER_CHLRE Ferredoxin, chloroplastic OS=Chlamydomonas reinhardtii OX=3055 GN=PETF PE=1 SV=2 && PF00111:2Fe-2S iron-sulfur cluster binding domain
gene_QJQ45_029981	1.13219	1.63e-14	PAO_ORYSJ	PAO	hypothetical protein && sp|Q0DV66|PAO_ORYSJ Pheophorbide a oxygenase, chloroplastic OS=Oryza sativa subsp. japonica OX=39947 GN=PAO PE=2 SV=1 && PF00355:Rieske [2Fe-2S] domain|PF08417:Pheophorbide a oxygenase
gene_QJQ45_027783	-2.11726	1.96e-14	VATD_ARATH	VHA-D	hypothetical protein && sp|Q9XGM1|VATD_ARATH V-type proton ATPase subunit D OS=Arabidopsis thaliana OX=3702 GN=VHA-D PE=1 SV=2 && PF01813:ATP synthase subunit D
gene_QJQ45_021491	-1.2008	2e-14	AK3_ARATH	AK3	hypothetical protein && sp|Q9S702|AK3_ARATH Aspartokinase 3, chloroplastic OS=Arabidopsis thaliana OX=3702 GN=AK3 PE=1 SV=1 && -
gene_QJQ45_016845	1.27133	2.03e-14	IMCL1_ORYSJ	IMCEL1	hypothetical protein && sp|Q5Z9I2|IMCL1_ORYSJ Probable isoprenylcysteine alpha-carbonyl methylesterase ICMEL1 OS=Oryza sativa subsp. japonica OX=39947 GN=IMCEL1 PE=2 SV=1 && PF20434:BD-FAE
gene_QJQ45_009160	-1.46653	3.24e-14	GCYB2_RAT	Gucy1b2	hypothetical protein && sp|P22717|GCYB2_RAT Guanylate cyclase soluble subunit beta-2 OS=Rattus norvegicus OX=10116 GN=Gucy1b2 PE=2 SV=1 && PF00211:Adenylate and Guanylate cyclase catalytic domain
gene_QJQ45_012285	2.34919	3.87e-14	POLX_TOBAC	#N/A	hypothetical protein && sp|P10978|POLX_TOBAC Retrovirus-related Pol polyprotein from transposon TNT 1-94 OS=Nicotiana tabacum OX=4097 PE=2 SV=1 && PF07727:Reverse transcriptase (RNA-dependent DNA polymerase)|PF14223:gag-polypeptide of LTR copia-type|PF00665:Integrase core domain|PF13976:GAG-pre-integrase domain
gene_QJQ45_017536	-1.03488	3.91e-14	HDA22_DICDI	hdaC	hypothetical protein && sp|Q54VQ7|HDA22_DICDI Type-2 histone deacetylase 2 OS=Dictyostelium discoideum OX=44689 GN=hdaC PE=2 SV=1 && PF00850:Histone deacetylase domain
gene_QJQ45_009652	2.4283	3.97e-14	NPCL1_RAT	Npc1l1	hypothetical protein && sp|Q6T3U3|NPCL1_RAT NPC1-like intracellular cholesterol transporter 1 OS=Rattus norvegicus OX=10116 GN=Npc1l1 PE=1 SV=1 && PF02460:Patched family
gene_QJQ45_022081	2.9015	5.05e-14	CALM_YEAST	CMD1	hypothetical protein && sp|P06787|CALM_YEAST Calmodulin OS=Saccharomyces cerevisiae (strain ATCC 204508 / S288c) OX=559292 GN=CMD1 PE=1 SV=1 && PF03094:Mlo family
gene_QJQ45_026634	-1.05832	5.3e-14	C7102_ARATH	CYP710A2	hypothetical protein && sp|O64698|C7102_ARATH Cytochrome P450 710A2 OS=Arabidopsis thaliana OX=3702 GN=CYP710A2 PE=1 SV=1 && PF00067:Cytochrome P450
gene_QJQ45_003441	1.24216	5.61e-14	DUSP4_DICDI	DDB_G0281963	hypothetical protein && sp|Q54T76|DUSP4_DICDI Probable dual specificity protein phosphatase DDB_G0281963 OS=Dictyostelium discoideum OX=44689 GN=DDB_G0281963 PE=3 SV=1 && PF00702:haloacid dehalogenase-like hydrolase
gene_QJQ45_029269	1.72977	8.02e-14	BIODA_ARATH	BIO3-BIO1	hypothetical protein && sp|B0F481|BIODA_ARATH Bifunctional dethiobiotin synthetase/7,8-diamino-pelargonic acid aminotransferase, mitochondrial OS=Arabidopsis thaliana OX=3702 GN=BIO3-BIO1 PE=1 SV=1 && PF00202:Aminotransferase class-III
gene_QJQ45_012497	-1.25486	1.05e-13	RLMN_NITMU	rlmN	hypothetical protein && sp|Q2Y6F3|RLMN_NITMU Dual-specificity RNA methyltransferase RlmN OS=Nitrosospira multiformis (strain ATCC 25196 / NCIMB 11849 / C 71) OX=323848 GN=rlmN PE=3 SV=1 && -
gene_QJQ45_000467	1.02849	1.14e-13	MBOA1_ARATH	LPCAT1	hypothetical protein && sp|F4IDU4|MBOA1_ARATH Lysophospholipid acyltransferase 1 OS=Arabidopsis thaliana OX=3702 GN=LPCAT1 PE=1 SV=1 && PF03062:MBOAT, membrane-bound O-acyltransferase family
gene_QJQ45_021314	-1.44895	1.2e-13	ZNFX1_MOUSE	Znfx1	hypothetical protein && sp|Q8R151|ZNFX1_MOUSE NFX1-type zinc finger-containing protein 1 OS=Mus musculus OX=10090 GN=Znfx1 PE=1 SV=3 && PF00004:ATPase family associated with various cellular activities (AAA)|PF13086:AAA domain|PF13087:AAA domain
gene_QJQ45_018991	-1.54353	1.35e-13	PSBP_CHLRE	PSBP	hypothetical protein && sp|P11471|PSBP_CHLRE Oxygen-evolving enhancer protein 2, chloroplastic OS=Chlamydomonas reinhardtii OX=3055 GN=PSBP PE=1 SV=1 && PF01789:PsbP|PF20928:PsbP, C-terminal
gene_QJQ45_019441	2.88481	1.37e-13	POLX_TOBAC	#N/A	hypothetical protein && sp|P10978|POLX_TOBAC Retrovirus-related Pol polyprotein from transposon TNT 1-94 OS=Nicotiana tabacum OX=4097 PE=2 SV=1 && PF07727:Reverse transcriptase (RNA-dependent DNA polymerase)|PF13976:GAG-pre-integrase domain|PF00665:Integrase core domain
gene_QJQ45_029392	-1.14249	1.54e-13	MTBC_RICCO	RCOM_0591060	hypothetical protein && sp|B9SQI7|MTBC_RICCO Probable bifunctional methylthioribulose-1-phosphate dehydratase/enolase-phosphatase E1 OS=Ricinus communis OX=3988 GN=RCOM_0591060 PE=3 SV=1 && PF00596:Class II Aldolase and Adducin N-terminal domain|PF00702:haloacid dehalogenase-like hydrolase
gene_QJQ45_009075	-2.67388	2.31e-13	HS16A_WHEAT	hsp16.9A	hypothetical protein && sp|P12810|HS16A_WHEAT 16.9 kDa class I heat shock protein 1 OS=Triticum aestivum OX=4565 GN=hsp16.9A PE=2 SV=1 && PF00011:Hsp20/alpha crystallin family
gene_QJQ45_012503	2.18046	2.58e-13	ACA5_ORYSJ	ACA5	hypothetical protein && sp|Q7X8B5|ACA5_ORYSJ Calcium-transporting ATPase 5, plasma membrane-type OS=Oryza sativa subsp. japonica OX=39947 GN=ACA5 PE=1 SV=2 && -
gene_QJQ45_017823	-1.88176	2.92e-13	UBE2S_LITCT	#N/A	hypothetical protein && sp|C1C3R6|UBE2S_LITCT Ubiquitin-conjugating enzyme E2 S OS=Lithobates catesbeianus OX=8400 GN=ube2s PE=2 SV=1 && PF00179:Ubiquitin-conjugating enzyme
gene_QJQ45_013730	-1.59234	3.16e-13	TRNHF_ARATH	At5g06060	hypothetical protein && sp|Q9LHT0|TRNHF_ARATH Tropinone reductase homolog At5g06060 OS=Arabidopsis thaliana OX=3702 GN=At5g06060 PE=2 SV=1 && PF00106:short chain dehydrogenase|PF13561:Enoyl-(Acyl carrier protein) reductase
gene_QJQ45_021864	1.27319	3.79e-13	Y3684_ARATH	#N/A	hypothetical protein && sp|Q9LW26|Y3684_ARATH Acyltransferase-like protein At3g26840, chloroplastic OS=Arabidopsis thaliana OX=3702 GN=At3g26840 PE=1 SV=1 && -
gene_QJQ45_021746	-1.28992	5.13e-13	SODM_CHLRE	SODA	hypothetical protein && sp|Q42684|SODM_CHLRE Superoxide dismutase [Mn], mitochondrial OS=Chlamydomonas reinhardtii OX=3055 GN=SODA PE=2 SV=1 && PF02777:Iron/manganese superoxide dismutases, C-terminal domain
gene_QJQ45_000808	-1.06037	5.95e-13	ARUH_PSEAE	aruH	hypothetical protein && sp|Q9HUI9|ARUH_PSEAE Arginine--pyruvate transaminase AruH OS=Pseudomonas aeruginosa (strain ATCC 15692 / DSM 22644 / CIP 104116 / JCM 14847 / LMG 12228 / 1C / PRS 101 / PAO1) OX=208964 GN=aruH PE=1 SV=1 && PF00155:Aminotransferase class I and II
gene_QJQ45_025235	-1.42556	6.17e-13	NFXL2_ARATH	NFXL2	hypothetical protein && sp|Q9FFK8|NFXL2_ARATH NF-X1-type zinc finger protein NFXL2 OS=Arabidopsis thaliana OX=3702 GN=NFXL2 PE=1 SV=2 && -
gene_QJQ45_016343	1.18711	6.88e-13	STY17_ARATH	STY17	hypothetical protein && sp|Q8RWL6|STY17_ARATH Serine/threonine-protein kinase STY17 OS=Arabidopsis thaliana OX=3702 GN=STY17 PE=1 SV=1 && PF07714:Protein tyrosine and serine/threonine kinase
gene_QJQ45_006724	-1.89785	7.05e-13	GCYB2_RAT	Gucy1b2	hypothetical protein && sp|P22717|GCYB2_RAT Guanylate cyclase soluble subunit beta-2 OS=Rattus norvegicus OX=10116 GN=Gucy1b2 PE=2 SV=1 && PF00211:Adenylate and Guanylate cyclase catalytic domain
gene_QJQ45_018347	-1.04452	1.08e-12	STR14_ARATH	At4g27700	hypothetical protein && sp|Q94A65|STR14_ARATH Rhodanese-like domain-containing protein 14, chloroplastic OS=Arabidopsis thaliana OX=3702 GN=At4g27700 PE=2 SV=1 && -
gene_QJQ45_018687	2.67595	1.39e-12	POL3_DROME	pol	hypothetical protein && sp|P04323|POL3_DROME Retrovirus-related Pol polyprotein from transposon 17.6 OS=Drosophila melanogaster OX=7227 GN=pol PE=4 SV=1 && PF01384:Phosphate transporter family|PF00385:Chromo (CHRromatin Organisation MOdifier) domain|PF17917:RNase H-like domain found in reverse transcriptase|PF00078:Reverse transcriptase (RNA-dependent DNA polymerase)|PF17919:RNase H-like domain f…
gene_QJQ45_022417	3.9654	1.39e-12	GUN3_ORYSJ	GLU8	hypothetical protein && sp|Q8LQ92|GUN3_ORYSJ Endoglucanase 3 OS=Oryza sativa subsp. japonica OX=39947 GN=GLU8 PE=2 SV=1 && PF13641:Glycosyltransferase like family 2|PF00759:Glycosyl hydrolase family 9
gene_QJQ45_026473	1.32262	1.53e-12	SELO_MOUSE	Selenoo	hypothetical protein && sp|Q9DBC0|SELO_MOUSE Protein adenylyltransferase SelO, mitochondrial OS=Mus musculus OX=10090 GN=Selenoo PE=1 SV=4 && PF02696:Protein adenylyltransferase SelO
gene_QJQ45_027600	1.21219	1.78e-12	CCA11_ORYSJ	CYCA1-1	hypothetical protein && sp|Q7F830|CCA11_ORYSJ Cyclin-A1-1 OS=Oryza sativa subsp. japonica OX=39947 GN=CYCA1-1 PE=2 SV=1 && PF00134:Cyclin, N-terminal domain|PF02984:Cyclin, C-terminal domain
novel.2693	-1.25141	2.34e-12	PPDK2_ORYSJ	PPDK2	- && sp|Q75KR1|PPDK2_ORYSJ Pyruvate, phosphate dikinase 2 OS=Oryza sativa subsp. japonica OX=39947 GN=PPDK2 PE=3 SV=1 && PF02896:PEP-utilising enzyme, PEP-binding domain
gene_QJQ45_001374	-1.34027	3.39e-12	BCH_HAELA	CRTZ	hypothetical protein && sp|Q9SPK6|BCH_HAELA Beta-carotene 3-hydroxylase, chloroplastic (Fragment) OS=Haematococcus lacustris OX=44745 GN=CRTZ PE=2 SV=1 && PF04116:Fatty acid hydroxylase
gene_QJQ45_026555	1.31768	3.42e-12	MB3R4_ARATH	MYB3R4	hypothetical protein && sp|Q94FL9|MB3R4_ARATH Transcription factor MYB3R-4 OS=Arabidopsis thaliana OX=3702 GN=MYB3R4 PE=1 SV=1 && PF13921:Myb-like DNA-binding domain
gene_QJQ45_026616	-1.01344	3.57e-12	P5CS2_ARATH	P5CSB	hypothetical protein && sp|P54888|P5CS2_ARATH Delta-1-pyrroline-5-carboxylate synthase B OS=Arabidopsis thaliana OX=3702 GN=P5CSB PE=2 SV=1 && PF00171:Aldehyde dehydrogenase family
gene_QJQ45_016672	1.46857	5.41e-12	CMC_DROME	Aralar	hypothetical protein && sp|Q9VA73|CMC_DROME Calcium-binding mitochondrial carrier protein Aralar1 OS=Drosophila melanogaster OX=7227 GN=aralar1 PE=2 SV=1 && PF00153:Mitochondrial carrier protein
gene_QJQ45_018043	1.33263	5.61e-12	UPM1_ARATH	UPM1	hypothetical protein && sp|Q42606|UPM1_ARATH S-adenosyl-L-methionine-dependent uroporphyrinogen III methyltransferase, chloroplastic OS=Arabidopsis thaliana OX=3702 GN=UPM1 PE=1 SV=1 && PF00590:Tetrapyrrole (Corrin/Porphyrin) Methylases
gene_QJQ45_030168	-1.91246	6.15e-12	POLX_TOBAC	#N/A	hypothetical protein && sp|P10978|POLX_TOBAC Retrovirus-related Pol polyprotein from transposon TNT 1-94 OS=Nicotiana tabacum OX=4097 PE=2 SV=1 && PF07727:Reverse transcriptase (RNA-dependent DNA polymerase)
gene_QJQ45_026289	-1.15138	6.45e-12	ABCGM_DICDI	abcG22	hypothetical protein && sp|Q55DA0|ABCGM_DICDI ABC transporter G family member 22 OS=Dictyostelium discoideum OX=44689 GN=abcG22 PE=2 SV=1 && PF00005:ABC transporter|PF01061:ABC-2 type transporter
novel.8360	-2.39308	6.48e-12	TRNK1_MOUSE	Trank1	- && sp|Q8BV79|TRNK1_MOUSE TPR and ankyrin repeat-containing protein 1 OS=Mus musculus OX=10090 GN=Trank1 PE=2 SV=3 && -
gene_QJQ45_017717	1.07386	6.7e-12	TAZ_DANRE	tafazzin	hypothetical protein && sp|F1QCP6|TAZ_DANRE Tafazzin OS=Danio rerio OX=7955 GN=taz PE=2 SV=1 && PF01553:Acyltransferase
gene_QJQ45_021669	1.60565	7.12e-12	TEB_ARATH	TEB	hypothetical protein && sp|Q588V7|TEB_ARATH Helicase and polymerase-containing protein TEBICHI OS=Arabidopsis thaliana OX=3702 GN=TEB PE=2 SV=1 && PF21099:DNA_pol_Q helicase like region helical domain
novel.1609	6.6902	7.72e-12	PSBS1_CHLRE	PSBS1	- && sp|A8HPM2|PSBS1_CHLRE Photosystem II protein PSBS1 OS=Chlamydomonas reinhardtii OX=3055 GN=PSBS1 PE=1 SV=1 && -
novel.8681	-1.71987	1e-11	MASY_EMENI	acuE	- && sp|P28344|MASY_EMENI Malate synthase, glyoxysomal OS=Emericella nidulans (strain FGSC A4 / ATCC 38163 / CBS 112.46 / NRRL 194 / M139) OX=227321 GN=acuE PE=3 SV=3 && PF01274:Malate synthase, TIM barrel domain
gene_QJQ45_022384	1.13233	1.64e-11	CEPT1_MOUSE	Cept1	hypothetical protein && sp|Q8BGS7|CEPT1_MOUSE Choline/ethanolaminephosphotransferase 1 OS=Mus musculus OX=10090 GN=Cept1 PE=1 SV=1 && -
gene_QJQ45_009097	-1.1661	1.83e-11	UAPA_EMENI	uapA	hypothetical protein && sp|Q07307|UAPA_EMENI Uric acid-xanthine permease OS=Emericella nidulans (strain FGSC A4 / ATCC 38163 / CBS 112.46 / NRRL 194 / M139) OX=227321 GN=uapA PE=1 SV=3 && PF00860:Permease family
gene_QJQ45_022224	-1.12761	2.53e-11	TRUA1_PARUW	truA1	hypothetical protein && sp|Q6MEE7|TRUA1_PARUW tRNA pseudouridine synthase A 1 OS=Protochlamydia amoebophila (strain UWE25) OX=264201 GN=truA1 PE=3 SV=1 && PF00076:RNA recognition motif|PF01416:tRNA pseudouridine synthase
gene_QJQ45_016836	1.50498	2.93e-11	Y9955_DICDI	DDB_G0267514	hypothetical protein && sp|Q55GU0|Y9955_DICDI Probable serine/threonine-protein kinase DDB_G0267514 OS=Dictyostelium discoideum OX=44689 GN=DDB_G0267514 PE=3 SV=1 && -
gene_QJQ45_013671	1.06892	3.39e-11	POLX_TOBAC	#N/A	hypothetical protein && sp|P10978|POLX_TOBAC Retrovirus-related Pol polyprotein from transposon TNT 1-94 OS=Nicotiana tabacum OX=4097 PE=2 SV=1 && PF14223:gag-polypeptide of LTR copia-type|PF00665:Integrase core domain
gene_QJQ45_000939	1.65349	3.5e-11	THIO1_SYNY3	slr0233	hypothetical protein && sp|P52232|THIO1_SYNY3 Thioredoxin-like protein slr0233 OS=Synechocystis sp. (strain PCC 6803 / Kazusa) OX=1111708 GN=slr0233 PE=1 SV=1 && PF00085:Thioredoxin
gene_QJQ45_015337	1.82721	5.47e-11	YTX2_XENLA	#N/A	hypothetical protein && sp|P14381|YTX2_XENLA Transposon TX1 uncharacterized 149 kDa protein OS=Xenopus laevis OX=8355 PE=4 SV=1 && PF00078:Reverse transcriptase (RNA-dependent DNA polymerase)
gene_QJQ45_029031	3.19391	8.22e-11	RTE1_ARATH	RTE1	hypothetical protein && sp|F4ITL6|RTE1_ARATH Protein REVERSION-TO-ETHYLENE SENSITIVITY1 OS=Arabidopsis thaliana OX=3702 GN=RTE1 PE=1 SV=1 && PF05608:Protein of unknown function (DUF778)
gene_QJQ45_024088	-1.85133	1.01e-10	POL2_DROME	pol	hypothetical protein && sp|P20825|POL2_DROME Retrovirus-related Pol polyprotein from transposon 297 OS=Drosophila melanogaster OX=7227 GN=pol PE=4 SV=1 && PF17919:RNase H-like domain found in reverse transcriptase|PF00078:Reverse transcriptase (RNA-dependent DNA polymerase)
gene_QJQ45_003965	2.74715	1.08e-10	POL4_DROME	POL	hypothetical protein && sp|P10394|POL4_DROME Retrovirus-related Pol polyprotein from transposon 412 OS=Drosophila melanogaster OX=7227 GN=POL PE=4 SV=1 && PF00078:Reverse transcriptase (RNA-dependent DNA polymerase)|PF00385:Chromo (CHRromatin Organisation MOdifier) domain|PF17919:RNase H-like domain found in reverse transcriptase
gene_QJQ45_019304	-1.22573	1.3e-10	ALB31_CHLRE	ALB3.1	hypothetical protein && sp|Q8S339|ALB31_CHLRE Inner membrane ALBINO3-like protein 1, chloroplastic OS=Chlamydomonas reinhardtii OX=3055 GN=ALB3.1 PE=3 SV=1 && PF02096:60Kd inner membrane protein
gene_QJQ45_022348	-1.16012	1.45e-10	RPE_SPIOL	RPE	hypothetical protein && sp|Q43157|RPE_SPIOL Ribulose-phosphate 3-epimerase, chloroplastic OS=Spinacia oleracea OX=3562 GN=RPE PE=1 SV=1 && PF00834:Ribulose-phosphate 3 epimerase family
gene_QJQ45_025273	-1.00482	1.6e-10	CFA36_MOUSE	Cfap36	hypothetical protein && sp|Q8C6E0|CFA36_MOUSE Cilia- and flagella-associated protein 36 OS=Mus musculus OX=10090 GN=Cfap36 PE=1 SV=1 && PF11527:The ARF-like 2 binding protein BART
gene_QJQ45_011717	-1.32879	1.96e-10	GLYR1_ARATH	GLYR1	hypothetical protein && sp|Q9LSV0|GLYR1_ARATH Glyoxylate/succinic semialdehyde reductase 1 OS=Arabidopsis thaliana OX=3702 GN=GLYR1 PE=1 SV=1 && PF03446:NAD binding domain of 6-phosphogluconate dehydrogenase
gene_QJQ45_014726	1.28357	1.97e-10	P2C77_ARATH	ABI2	hypothetical protein && sp|O04719|P2C77_ARATH Protein phosphatase 2C 77 OS=Arabidopsis thaliana OX=3702 GN=ABI2 PE=1 SV=1 && PF00481:Protein phosphatase 2C|PF02714:Calcium-dependent channel, 7TM region, putative phosphate|PF13967:Late exocytosis, associated with Golgi transport
gene_QJQ45_005131	1.02243	2.18e-10	DHQS_ACTCC	DHQS	hypothetical protein && sp|U3KRF2|DHQS_ACTCC 3-dehydroquinate synthase, chloroplastic OS=Actinidia chinensis var. chinensis OX=1590841 GN=DHQS PE=1 SV=3 && PF01761:3-dehydroquinate synthase
novel.2532	1.35813	2.28e-10	RUS5_ARATH	RUS5	- && sp|B6IDH3|RUS5_ARATH Protein root UVB sensitive 5 OS=Arabidopsis thaliana OX=3702 GN=RUS5 PE=2 SV=1 && -
gene_QJQ45_028477	1.12086	2.59e-10	ODA1_CHLRE	ODA1	hypothetical protein && sp|A8JF70|ODA1_CHLRE Outer dynein arm protein 1 OS=Chlamydomonas reinhardtii OX=3055 GN=ODA1 PE=1 SV=1 && PF21773:Domain of unknown function (DUF6872)
gene_QJQ45_022614	2.52604	2.64e-10	SIS8_ARATH	SIS8	hypothetical protein && sp|Q9C9U5|SIS8_ARATH Probable serine/threonine-protein kinase SIS8 OS=Arabidopsis thaliana OX=3702 GN=SIS8 PE=1 SV=1 && PF07714:Protein tyrosine and serine/threonine kinase
gene_QJQ45_014683	-1.09742	2.65e-10	SHKB_DICDI	shkB	hypothetical protein && sp|Q54IP4|SHKB_DICDI Dual specificity protein kinase shkB OS=Dictyostelium discoideum OX=44689 GN=shkB PE=3 SV=1 && PF00069:Protein kinase domain
novel.1014	5.05049	2.85e-10	PSBS1_ORYSI	PSBS1	- && sp|A2WXD9|PSBS1_ORYSI Photosystem II 22 kDa protein 1, chloroplastic OS=Oryza sativa subsp. indica OX=39946 GN=PSBS1 PE=1 SV=1 && -
gene_QJQ45_007048	-1.18236	2.94e-10	ALAC_ECOLI	alaC	hypothetical protein && sp|P77434|ALAC_ECOLI Glutamate-pyruvate aminotransferase AlaC OS=Escherichia coli (strain K12) OX=83333 GN=alaC PE=1 SV=1 && PF00155:Aminotransferase class I and II
gene_QJQ45_004999	3.96588	3.18e-10	Y1181_ARATH	At1g71810	hypothetical protein && sp|Q94BU1|Y1181_ARATH Uncharacterized aarF domain-containing protein kinase At1g71810, chloroplastic OS=Arabidopsis thaliana OX=3702 GN=At1g71810 PE=1 SV=1 && PF03109:ABC1 atypical kinase-like domain
gene_QJQ45_020332	-1.36374	4.09e-10	PHOB_RHIME	#N/A	hypothetical protein && sp|Q52990|PHOB_RHIME Phosphate regulon transcriptional regulatory protein PhoB OS=Rhizobium meliloti (strain 1021) OX=266834 GN=phoB PE=3 SV=1 && PF00072:Response regulator receiver domain
gene_QJQ45_027697	1.38688	4.98e-10	SDN2_ARATH	SDN2	hypothetical protein && sp|Q9FFG1|SDN2_ARATH Small RNA degrading nuclease 2 OS=Arabidopsis thaliana OX=3702 GN=SDN2 PE=2 SV=1 && -
gene_QJQ45_016115	-1.13744	7.29e-10	DAPAT_SYNFM	dapL	hypothetical protein && sp|A0LEA5|DAPAT_SYNFM LL-diaminopimelate aminotransferase OS=Syntrophobacter fumaroxidans (strain DSM 10017 / MPOB) OX=335543 GN=dapL PE=1 SV=1 && PF00155:Aminotransferase class I and II
gene_QJQ45_014521	1.32302	7.48e-10	STY17_ARATH	STY17	hypothetical protein && sp|Q8RWL6|STY17_ARATH Serine/threonine-protein kinase STY17 OS=Arabidopsis thaliana OX=3702 GN=STY17 PE=1 SV=1 && PF00069:Protein kinase domain
gene_QJQ45_017179	-1.05723	8.84e-10	STY17_ARATH	STY17	hypothetical protein && sp|Q8RWL6|STY17_ARATH Serine/threonine-protein kinase STY17 OS=Arabidopsis thaliana OX=3702 GN=STY17 PE=1 SV=1 && PF00069:Protein kinase domain|PF07714:Protein tyrosine and serine/threonine kinase
gene_QJQ45_024432	-1.55775	9.11e-10	BUP1_ARATH	PYD3	hypothetical protein && sp|Q8H183|BUP1_ARATH Beta-ureidopropionase OS=Arabidopsis thaliana OX=3702 GN=PYD3 PE=1 SV=1 && PF00795:Carbon-nitrogen hydrolase
gene_QJQ45_028941	1.08098	9.74e-10	DNAJ2_THET8	dnaJ2	hypothetical protein && sp|Q56237|DNAJ2_THET8 Chaperone protein DnaJ 2 OS=Thermus thermophilus (strain ATCC 27634 / DSM 579 / HB8) OX=300852 GN=dnaJ2 PE=1 SV=2 && PF00226:DnaJ domain
gene_QJQ45_006729	-1.09092	1.08e-09	PAAS_ARATH	ELI5	hypothetical protein && sp|Q8RY79|PAAS_ARATH Phenylacetaldehyde synthase OS=Arabidopsis thaliana OX=3702 GN=ELI5 PE=1 SV=1 && PF00282:Pyridoxal-dependent decarboxylase conserved domain
gene_QJQ45_008209	1.08157	1.16e-09	ISS1_ARATH	ISS1	hypothetical protein && sp|Q9C969|ISS1_ARATH Aromatic aminotransferase ISS1 OS=Arabidopsis thaliana OX=3702 GN=ISS1 PE=1 SV=1 && PF00155:Aminotransferase class I and II
gene_QJQ45_029780	-1.48913	1.24e-09	Y9963_DICDI	DDB_G0272254	hypothetical protein && sp|Q55A09|Y9963_DICDI Probable serine/threonine-protein kinase DDB_G0272254 OS=Dictyostelium discoideum OX=44689 GN=DDB_G0272254 PE=3 SV=1 && PF00069:Protein kinase domain
gene_QJQ45_013145	1.82318	2.07e-09	YI31B_YEAST	TY3B-I	hypothetical protein && sp|Q7LHG5|YI31B_YEAST Transposon Ty3-I Gag-Pol polyprotein OS=Saccharomyces cerevisiae (strain ATCC 204508 / S288c) OX=559292 GN=TY3B-I PE=1 SV=2 && PF17921:Integrase zinc binding domain|PF00385:Chromo (CHRromatin Organisation MOdifier) domain|PF00078:Reverse transcriptase (RNA-dependent DNA polymerase)|PF00665:Integrase core domain|PF17917:RNase H-like domain found in rev…
gene_QJQ45_009156	-1.35333	2.32e-09	FRI3_ARATH	FER3	hypothetical protein && sp|Q9LYN2|FRI3_ARATH Ferritin-3, chloroplastic OS=Arabidopsis thaliana OX=3702 GN=FER3 PE=1 SV=1 && PF00210:Ferritin-like domain
gene_QJQ45_025175	1.09474	2.65e-09	AT8A2_MOUSE	Atp8a2	hypothetical protein && sp|P98200|AT8A2_MOUSE Phospholipid-transporting ATPase IB OS=Mus musculus OX=10090 GN=Atp8a2 PE=1 SV=1 && PF16209:Phospholipid-translocating ATPase N-terminal
gene_QJQ45_008498	1.08122	2.75e-09	BQMT_SYNY3	sll0418	hypothetical protein && sp|P74388|BQMT_SYNY3 2-methyl-6-phytyl-1,4-hydroquinone methyltransferase OS=Synechocystis sp. (strain PCC 6803 / Kazusa) OX=1111708 GN=sll0418 PE=1 SV=1 && PF13649:Methyltransferase domain|PF03153:Transcription factor IIA, alpha/beta subunit
gene_QJQ45_004635	-1.00282	2.94e-09	CSGA_MYXXA	csgA	hypothetical protein && sp|P21158|CSGA_MYXXA C-factor OS=Myxococcus xanthus OX=34 GN=csgA PE=1 SV=1 && PF02678:Pirin|PF00106:short chain dehydrogenase
gene_QJQ45_019939	4.61227	3.03e-09	GUN3_ORYSJ	GLU8	hypothetical protein && sp|Q8LQ92|GUN3_ORYSJ Endoglucanase 3 OS=Oryza sativa subsp. japonica OX=39947 GN=GLU8 PE=2 SV=1 && PF13632:Glycosyl transferase family group 2|PF00759:Glycosyl hydrolase family 9
gene_QJQ45_022010	-1.10176	3.48e-09	LHSR1_CHLRE	LHCSR1	hypothetical protein && sp|P93664|LHSR1_CHLRE Light-harvesting complex stress-related protein 1, chloroplastic OS=Chlamydomonas reinhardtii OX=3055 GN=LHCSR1 PE=1 SV=1 && PF00504:Chlorophyll A-B binding protein
gene_QJQ45_030163	5.81214	3.54e-09	POLR_DROME	pol	hypothetical protein && sp|P16423|POLR_DROME Retrovirus-related Pol polyprotein from type-2 retrotransposable element R2DM OS=Drosophila melanogaster OX=7227 GN=pol PE=4 SV=1 && PF03372:Endonuclease/Exonuclease/phosphatase family|PF00075:RNase H|PF02099:Josephin|PF00078:Reverse transcriptase (RNA-dependent DNA polymerase)
gene_QJQ45_013219	-1.86527	3.56e-09	CHLI_CHLRE	CHLI	hypothetical protein && sp|Q94FT3|CHLI_CHLRE Magnesium-chelatase subunit ChlI, chloroplastic OS=Chlamydomonas reinhardtii OX=3055 GN=CHLI PE=2 SV=1 && PF17863:AAA lid domain
gene_QJQ45_004481	-1.71988	3.93e-09	CHLD_TOBAC	CHLD	hypothetical protein && sp|O24133|CHLD_TOBAC Magnesium-chelatase subunit ChlD, chloroplastic OS=Nicotiana tabacum OX=4097 GN=CHLD PE=2 SV=1 && PF17863:AAA lid domain|PF13519:von Willebrand factor type A domain
gene_QJQ45_006494	1.08033	4.41e-09	MGDG_TOBAC	MGD A	hypothetical protein && sp|Q9FZL3|MGDG_TOBAC Probable monogalactosyldiacylglycerol synthase, chloroplastic OS=Nicotiana tabacum OX=4097 GN=MGD A PE=2 SV=1 && -
gene_QJQ45_016719	-1.06867	5.05e-09	PDPKB_DICDI	pdkB	hypothetical protein && sp|Q54PK9|PDPKB_DICDI 3-phosphoinositide-dependent protein kinase B OS=Dictyostelium discoideum OX=44689 GN=pdkB PE=3 SV=1 && PF00069:Protein kinase domain
gene_QJQ45_020815	1.8876	5.42e-09	CRYD_OSTTA	Ot01g06470	hypothetical protein && sp|Q5IFN2|CRYD_OSTTA Cryptochrome DASH, chloroplastic/mitochondrial OS=Ostreococcus tauri OX=70448 GN=Ot01g06470 PE=3 SV=1 && PF03441:FAD binding domain of DNA photolyase
gene_QJQ45_025051	-1.60672	5.95e-09	TTL13_HUMAN	TTLL13	hypothetical protein && sp|A6NNM8|TTL13_HUMAN Tubulin polyglutamylase TTLL13P OS=Homo sapiens OX=9606 GN=TTLL13P PE=1 SV=2 && PF03133:Tubulin-tyrosine ligase family
gene_QJQ45_008496	3.79215	6.45e-09	POL5_DROME	pol	hypothetical protein && sp|Q8I7P9|POL5_DROME Retrovirus-related Pol polyprotein from transposon opus OS=Drosophila melanogaster OX=7227 GN=pol PE=4 SV=1 && PF17917:RNase H-like domain found in reverse transcriptase|PF17921:Integrase zinc binding domain|PF00078:Reverse transcriptase (RNA-dependent DNA polymerase)|PF00628:PHD-finger
gene_QJQ45_013468	1.91742	6.62e-09	POLX_TOBAC	#N/A	hypothetical protein && sp|P10978|POLX_TOBAC Retrovirus-related Pol polyprotein from transposon TNT 1-94 OS=Nicotiana tabacum OX=4097 PE=2 SV=1 && PF13976:GAG-pre-integrase domain|PF07727:Reverse transcriptase (RNA-dependent DNA polymerase)|PF00665:Integrase core domain
gene_QJQ45_027358	-1.42052	6.83e-09	LCYE_SOLLC	CRTL-E-1	hypothetical protein && sp|O65837|LCYE_SOLLC Lycopene epsilon cyclase, chloroplastic OS=Solanum lycopersicum OX=4081 GN=CRTL-E-1 PE=2 SV=1 && PF05834:Lycopene cyclase protein
gene_QJQ45_028764	2.17277	6.91e-09	ATC1_DICDI	patA	hypothetical protein && sp|P54678|ATC1_DICDI Calcium-transporting ATPase PAT1 OS=Dictyostelium discoideum OX=44689 GN=patA PE=2 SV=2 && PF00690:Cation transporter/ATPase, N-terminus
gene_QJQ45_024703	-1.15735	7.13e-09	TLC1_ARATH	AATP1	hypothetical protein && sp|Q39002|TLC1_ARATH ADP,ATP carrier protein 1, chloroplastic OS=Arabidopsis thaliana OX=3702 GN=AATP1 PE=1 SV=2 && PF03219:TLC ATP/ADP transporter
gene_QJQ45_027289	1.05971	7.65e-09	DAAF1_HUMAN	DNAAF1	hypothetical protein && sp|Q8NEP3|DAAF1_HUMAN Dynein axonemal assembly factor 1 OS=Homo sapiens OX=9606 GN=DNAAF1 PE=2 SV=5 && PF08755:Hemimethylated DNA-binding protein YccV like
gene_QJQ45_024629	1.54939	7.72e-09	GCYB2_RAT	Gucy1b2	hypothetical protein && sp|P22717|GCYB2_RAT Guanylate cyclase soluble subunit beta-2 OS=Rattus norvegicus OX=10116 GN=Gucy1b2 PE=2 SV=1 && PF00211:Adenylate and Guanylate cyclase catalytic domain
gene_QJQ45_017592	1.12388	8.43e-09	BQMT_SYNY3	sll0418	hypothetical protein && sp|P74388|BQMT_SYNY3 2-methyl-6-phytyl-1,4-hydroquinone methyltransferase OS=Synechocystis sp. (strain PCC 6803 / Kazusa) OX=1111708 GN=sll0418 PE=1 SV=1 && PF13649:Methyltransferase domain
gene_QJQ45_021391	-1.23444	9.16e-09	MSH6_ARATH	MSH6	hypothetical protein && sp|O04716|MSH6_ARATH DNA mismatch repair protein MSH6 OS=Arabidopsis thaliana OX=3702 GN=MSH6 PE=1 SV=2 && PF00488:MutS domain V|PF01624:MutS domain I|PF05192:MutS domain III|PF01391:Collagen triple helix repeat (20 copies)|PF15140:Domain of unknown function (DUF4573)
novel.5374	-1.04521	9.81e-09	SRP72_CANLF	SRP72	- && sp|P33731|SRP72_CANLF Signal recognition particle subunit SRP72 OS=Canis lupus familiaris OX=9615 GN=SRP72 PE=1 SV=3 && -
gene_QJQ45_002083	-2.16992	9.85e-09	H32_BOVIN	#N/A	hypothetical protein && sp|P84227|H32_BOVIN Histone H3.2 OS=Bos taurus OX=9913 PE=1 SV=2 && PF00125:Core histone H2A/H2B/H3/H4
gene_QJQ45_002185	2.41677	9.9e-09	POL5_DROME	pol	hypothetical protein && sp|Q8I7P9|POL5_DROME Retrovirus-related Pol polyprotein from transposon opus OS=Drosophila melanogaster OX=7227 GN=pol PE=4 SV=1 && PF17917:RNase H-like domain found in reverse transcriptase|PF00078:Reverse transcriptase (RNA-dependent DNA polymerase)
gene_QJQ45_023003	1.53904	1.13e-08	CP4V2_MOUSE	Cyp4v2	hypothetical protein && sp|Q9DBW0|CP4V2_MOUSE Cytochrome P450 4V2 OS=Mus musculus OX=10090 GN=Cyp4v2 PE=1 SV=1 && PF00067:Cytochrome P450
gene_QJQ45_017482	1.04496	1.42e-08	POLR_DROME	pol	hypothetical protein && sp|P16423|POLR_DROME Retrovirus-related Pol polyprotein from type-2 retrotransposable element R2DM OS=Drosophila melanogaster OX=7227 GN=pol PE=4 SV=1 && PF00075:RNase H|PF00078:Reverse transcriptase (RNA-dependent DNA polymerase)
novel.1695	-1.01399	1.67e-08	FACR2_ARATH	FAR2	- && sp|Q08891|FACR2_ARATH Fatty acyl-CoA reductase 2, chloroplastic OS=Arabidopsis thaliana OX=3702 GN=FAR2 PE=1 SV=2 && -
gene_QJQ45_030373	-1.45834	1.73e-08	UAPA_EMENI	uapA	hypothetical protein && sp|Q07307|UAPA_EMENI Uric acid-xanthine permease OS=Emericella nidulans (strain FGSC A4 / ATCC 38163 / CBS 112.46 / NRRL 194 / M139) OX=227321 GN=uapA PE=1 SV=3 && PF00860:Permease family
gene_QJQ45_029624	1.79664	1.79e-08	YI31B_YEAST	TY3B-I	hypothetical protein && sp|Q7LHG5|YI31B_YEAST Transposon Ty3-I Gag-Pol polyprotein OS=Saccharomyces cerevisiae (strain ATCC 204508 / S288c) OX=559292 GN=TY3B-I PE=1 SV=2 && PF17917:RNase H-like domain found in reverse transcriptase|PF00385:Chromo (CHRromatin Organisation MOdifier) domain|PF00078:Reverse transcriptase (RNA-dependent DNA polymerase)|PF00665:Integrase core domain|PF17921:Integrase z…
gene_QJQ45_008014	-1.51603	1.79e-08	TOP2_ARATH	TOP2	hypothetical protein && sp|P30182|TOP2_ARATH DNA topoisomerase 2 OS=Arabidopsis thaliana OX=3702 GN=TOP2 PE=2 SV=2 && PF16898:C-terminal associated domain of TOPRIM|PF00204:DNA gyrase B|PF00521:DNA gyrase/topoisomerase IV, subunit A
gene_QJQ45_014344	1.54488	2.03e-08	GUN11_ORYSJ	GLU4	hypothetical protein && sp|Q7XTH4|GUN11_ORYSJ Endoglucanase 11 OS=Oryza sativa subsp. japonica OX=39947 GN=GLU4 PE=2 SV=3 && PF13632:Glycosyl transferase family group 2|PF00759:Glycosyl hydrolase family 9
novel.1550	-1.73837	2.22e-08	VF179_IIV6	IIV6-179R	- && sp|O55767|VF179_IIV6 Uncharacterized protein 179R OS=Invertebrate iridescent virus 6 OX=176652 GN=IIV6-179R PE=4 SV=1 && -
gene_QJQ45_014388	1.98933	2.27e-08	YI31B_YEAST	TY3B-I	hypothetical protein && sp|Q7LHG5|YI31B_YEAST Transposon Ty3-I Gag-Pol polyprotein OS=Saccharomyces cerevisiae (strain ATCC 204508 / S288c) OX=559292 GN=TY3B-I PE=1 SV=2 && PF17917:RNase H-like domain found in reverse transcriptase|PF17921:Integrase zinc binding domain|PF00078:Reverse transcriptase (RNA-dependent DNA polymerase)
gene_QJQ45_018495	-1.8398	2.69e-08	POC16_CHLRE	POC16	hypothetical protein && sp|A8JAN3|POC16_CHLRE Centriole proteome protein 16 OS=Chlamydomonas reinhardtii OX=3055 GN=POC16 PE=1 SV=1 && -
gene_QJQ45_012347	1.42541	2.72e-08	RFS_ORYSJ	RFS	hypothetical protein && sp|Q5VQG4|RFS_ORYSJ Galactinol--sucrose galactosyltransferase OS=Oryza sativa subsp. japonica OX=39947 GN=RFS PE=1 SV=1 && PF05691:Raffinose synthase or seed imbibition protein Sip1
gene_QJQ45_029915	-1.09365	2.9e-08	CH62_CUCMA	CPN60-2	hypothetical protein && sp|Q05046|CH62_CUCMA Chaperonin CPN60-2, mitochondrial OS=Cucurbita maxima OX=3661 GN=CPN60-2 PE=1 SV=1 && PF00118:TCP-1/cpn60 chaperonin family
gene_QJQ45_007883	1.17112	2.95e-08	PHR_ARATH	PHR1	hypothetical protein && sp|Q9SB00|PHR_ARATH Deoxyribodipyrimidine photo-lyase OS=Arabidopsis thaliana OX=3702 GN=PHR1 PE=2 SV=1 && PF00875:DNA photolyase
novel.6366	-2.17342	3.28e-08	KAT3_ARATH	KAT3	- && sp|P92960|KAT3_ARATH Potassium channel KAT3 OS=Arabidopsis thaliana OX=3702 GN=KAT3 PE=1 SV=1 && PF00520:Ion transport protein
novel.1608	3.03718	3.33e-08	PSBS1_CHLRE	PSBS1	- && sp|A8HPM2|PSBS1_CHLRE Photosystem II protein PSBS1 OS=Chlamydomonas reinhardtii OX=3055 GN=PSBS1 PE=1 SV=1 && -
gene_QJQ45_002483	-3.38051	3.61e-08	H32_BOVIN	#N/A	hypothetical protein && sp|P84227|H32_BOVIN Histone H3.2 OS=Bos taurus OX=9913 PE=1 SV=2 && PF00125:Core histone H2A/H2B/H3/H4
gene_QJQ45_015365	-1.20476	4.05e-08	HSP80_SOLLC	HSC80	hypothetical protein && sp|P36181|HSP80_SOLLC Heat shock cognate protein 80 OS=Solanum lycopersicum OX=4081 GN=HSC80 PE=2 SV=1 && PF01740:STAS domain|PF00183:Hsp90 protein|PF00916:Sulfate permease family
gene_QJQ45_005370	1.17489	4.25e-08	YG31B_YEAST	TY3B-G	hypothetical protein && sp|Q99315|YG31B_YEAST Transposon Ty3-G Gag-Pol polyprotein OS=Saccharomyces cerevisiae (strain ATCC 204508 / S288c) OX=559292 GN=TY3B-G PE=1 SV=3 && PF00385:Chromo (CHRromatin Organisation MOdifier) domain|PF00665:Integrase core domain|PF00078:Reverse transcriptase (RNA-dependent DNA polymerase)|PF17921:Integrase zinc binding domain|PF17917:RNase H-like domain found in rev…
gene_QJQ45_006470	1.12417	4.35e-08	Y2766_ARATH	At2g37660	hypothetical protein && sp|O80934|Y2766_ARATH Uncharacterized protein At2g37660, chloroplastic OS=Arabidopsis thaliana OX=3702 GN=At2g37660 PE=1 SV=2 && PF13460:NAD(P)H-binding
gene_QJQ45_025984	-1.24694	4.4e-08	BDH_MOUSE	Bdh1	hypothetical protein && sp|Q80XN0|BDH_MOUSE D-beta-hydroxybutyrate dehydrogenase, mitochondrial OS=Mus musculus OX=10090 GN=Bdh1 PE=1 SV=2 && PF00106:short chain dehydrogenase
gene_QJQ45_015488	2.31737	4.55e-08	NEK4_HUMAN	NEK4	hypothetical protein && sp|P51957|NEK4_HUMAN Serine/threonine-protein kinase Nek4 OS=Homo sapiens OX=9606 GN=NEK4 PE=1 SV=2 && PF00069:Protein kinase domain
gene_QJQ45_029637	1.25416	5.02e-08	ISOA1_ARATH	ISA1	hypothetical protein && sp|O04196|ISOA1_ARATH Isoamylase 1, chloroplastic OS=Arabidopsis thaliana OX=3702 GN=ISA1 PE=1 SV=1 && PF21156:Isoamylase 1-3, C-terminal
gene_QJQ45_021535	-1.16338	5.44e-08	D89S2_ARATH	At2g17340	hypothetical protein && sp|Q949P3|D89S2_ARATH Damage-control phosphatase At2g17340 OS=Arabidopsis thaliana OX=3702 GN=At2g17340 PE=1 SV=1 && PF01937:Damage-control phosphatase ARMT1-like domain
novel.905	4.91433	5.9e-08	PSBS_SOLLC	PSBS	- && sp|P54773|PSBS_SOLLC Photosystem II 22 kDa protein, chloroplastic OS=Solanum lycopersicum OX=4081 GN=PSBS PE=3 SV=1 && -
gene_QJQ45_028958	2.16382	6.94e-08	SGAA_METEA	sgaA	hypothetical protein && sp|P55819|SGAA_METEA Serine--glyoxylate aminotransferase OS=Methylorubrum extorquens (strain ATCC 14718 / DSM 1338 / JCM 2805 / NCIMB 9133 / AM1) OX=272630 GN=sgaA PE=1 SV=2 && PF00266:Aminotransferase class-V
gene_QJQ45_029896	1.62174	6.98e-08	GCYB2_RAT	Gucy1b2	hypothetical protein && sp|P22717|GCYB2_RAT Guanylate cyclase soluble subunit beta-2 OS=Rattus norvegicus OX=10116 GN=Gucy1b2 PE=2 SV=1 && PF00211:Adenylate and Guanylate cyclase catalytic domain
gene_QJQ45_008690	-1.43542	8.41e-08	SQD2_ARATH	SQD2	hypothetical protein && sp|Q8S4F6|SQD2_ARATH Sulfoquinovosyl transferase SQD2 OS=Arabidopsis thaliana OX=3702 GN=SQD2 PE=1 SV=1 && PF00534:Glycosyl transferases group 1|PF13439:Glycosyltransferase Family 4
gene_QJQ45_026590	-2.01739	9.64e-08	DCUP2_ARATH	HEME2	hypothetical protein && sp|O22886|DCUP2_ARATH Uroporphyrinogen decarboxylase 2, chloroplastic OS=Arabidopsis thaliana OX=3702 GN=HEME2 PE=2 SV=1 && PF01208:Uroporphyrinogen decarboxylase (URO-D)
gene_QJQ45_029858	1.13174	9.81e-08	YI31B_YEAST	TY3B-I	hypothetical protein && sp|Q7LHG5|YI31B_YEAST Transposon Ty3-I Gag-Pol polyprotein OS=Saccharomyces cerevisiae (strain ATCC 204508 / S288c) OX=559292 GN=TY3B-I PE=1 SV=2 && PF17917:RNase H-like domain found in reverse transcriptase|PF17919:RNase H-like domain found in reverse transcriptase|PF03732:Retrotransposon gag protein|PF00078:Reverse transcriptase (RNA-dependent DNA polymerase)|PF17921:Int…
gene_QJQ45_008201	2.0627	1.02e-07	CTL4_XENLA	slc44a4	hypothetical protein && sp|Q6GN42|CTL4_XENLA Choline transporter-like protein 4 OS=Xenopus laevis OX=8355 GN=slc44a4 PE=2 SV=1 && PF04515:Plasma-membrane choline transporter
novel.4247	2.63756	1.06e-07	LIPF_BOVIN	LIPF	- && sp|Q29458|LIPF_BOVIN Gastric triacylglycerol lipase OS=Bos taurus OX=9913 GN=LIPF PE=1 SV=1 && PF04083:Partial alpha/beta-hydrolase lipase region
gene_QJQ45_015435	-1.04208	1.07e-07	P4H8_ARATH	P4H8	hypothetical protein && sp|F4JNU8|P4H8_ARATH Probable prolyl 4-hydroxylase 8 OS=Arabidopsis thaliana OX=3702 GN=P4H8 PE=3 SV=1 && -
gene_QJQ45_025234	1.02329	1.13e-07	GPC1_SCHPO	gpc1	hypothetical protein && sp|O94673|GPC1_SCHPO Glycerophosphocholine acyltransferase 1 OS=Schizosaccharomyces pombe (strain 972 / ATCC 24843) OX=284812 GN=gpc1 PE=3 SV=2 && PF10998:Protein of unknown function (DUF2838)
gene_QJQ45_003256	1.36318	1.17e-07	YI31B_YEAST	TY3B-I	hypothetical protein && sp|Q7LHG5|YI31B_YEAST Transposon Ty3-I Gag-Pol polyprotein OS=Saccharomyces cerevisiae (strain ATCC 204508 / S288c) OX=559292 GN=TY3B-I PE=1 SV=2 && PF00665:Integrase core domain|PF17921:Integrase zinc binding domain|PF17917:RNase H-like domain found in reverse transcriptase|PF00078:Reverse transcriptase (RNA-dependent DNA polymerase)|PF00385:Chromo (CHRromatin Organisatio…
gene_QJQ45_001802	2.35639	1.18e-07	PTPC1_HUMAN	PTPDC1	hypothetical protein && sp|A2A3K4|PTPC1_HUMAN Protein tyrosine phosphatase domain-containing protein 1 OS=Homo sapiens OX=9606 GN=PTPDC1 PE=1 SV=1 && PF00102:Protein-tyrosine phosphatase
novel.4162	1.64857	1.18e-07	LIPF_BOVIN	LIPF	- && sp|Q29458|LIPF_BOVIN Gastric triacylglycerol lipase OS=Bos taurus OX=9913 GN=LIPF PE=1 SV=1 && -
gene_QJQ45_027243	1.35687	1.24e-07	ABCG2_PIG	ABCG2	hypothetical protein && sp|Q8MIB3|ABCG2_PIG Broad substrate specificity ATP-binding cassette transporter ABCG2 OS=Sus scrofa OX=9823 GN=ABCG2 PE=2 SV=1 && PF00005:ABC transporter|PF01061:ABC-2 type transporter
gene_QJQ45_005872	7.35879	1.29e-07	YG31B_YEAST	TY3B-G	hypothetical protein && sp|Q99315|YG31B_YEAST Transposon Ty3-G Gag-Pol polyprotein OS=Saccharomyces cerevisiae (strain ATCC 204508 / S288c) OX=559292 GN=TY3B-G PE=1 SV=3 && PF00078:Reverse transcriptase (RNA-dependent DNA polymerase)|PF00385:Chromo (CHRromatin Organisation MOdifier) domain|PF17921:Integrase zinc binding domain
gene_QJQ45_006493	1.04984	1.37e-07	MGDG_SOYBN	#N/A	hypothetical protein && sp|Q9FZL4|MGDG_SOYBN Probable monogalactosyldiacylglycerol synthase, chloroplastic OS=Glycine max OX=3847 GN=MGD A PE=2 SV=1 && -
gene_QJQ45_024411	1.01255	1.44e-07	BQMT_SYNY3	sll0418	hypothetical protein && sp|P74388|BQMT_SYNY3 2-methyl-6-phytyl-1,4-hydroquinone methyltransferase OS=Synechocystis sp. (strain PCC 6803 / Kazusa) OX=1111708 GN=sll0418 PE=1 SV=1 && PF13649:Methyltransferase domain
gene_QJQ45_017800	3.428	1.46e-07	CPNE9_RAT	Cpne9	hypothetical protein && sp|Q5BJS7|CPNE9_RAT Copine-9 OS=Rattus norvegicus OX=10116 GN=Cpne9 PE=2 SV=1 && PF07002:Copine
gene_QJQ45_007902	1.90313	1.51e-07	POLX_TOBAC	#N/A	hypothetical protein && sp|P10978|POLX_TOBAC Retrovirus-related Pol polyprotein from transposon TNT 1-94 OS=Nicotiana tabacum OX=4097 PE=2 SV=1 && PF13976:GAG-pre-integrase domain|PF14223:gag-polypeptide of LTR copia-type|PF07727:Reverse transcriptase (RNA-dependent DNA polymerase)
gene_QJQ45_019172	-1.22305	1.65e-07	SAPK9_ORYSJ	SAPK9	hypothetical protein && sp|Q75V57|SAPK9_ORYSJ Serine/threonine-protein kinase SAPK9 OS=Oryza sativa subsp. japonica OX=39947 GN=SAPK9 PE=1 SV=1 && PF00069:Protein kinase domain
gene_QJQ45_004886	3.4334	1.87e-07	CYAA_SCHPO	cyr1	hypothetical protein && sp|P14605|CYAA_SCHPO Adenylate cyclase OS=Schizosaccharomyces pombe (strain 972 / ATCC 24843) OX=284812 GN=cyr1 PE=1 SV=1 && -
novel.1435	-1.10781	2.11e-07	S47A1_HUMAN	SLC47A1	- && sp|Q96FL8|S47A1_HUMAN Multidrug and toxin extrusion protein 1 OS=Homo sapiens OX=9606 GN=SLC47A1 PE=1 SV=1 && PF01554:MatE
gene_QJQ45_007646	1.31783	2.24e-07	FABG_THEMA	fabG	hypothetical protein && sp|Q9X248|FABG_THEMA 3-oxoacyl-[acyl-carrier-protein] reductase FabG OS=Thermotoga maritima (strain ATCC 43589 / DSM 3109 / JCM 10099 / NBRC 100826 / MSB8) OX=243274 GN=fabG PE=3 SV=1 && PF13561:Enoyl-(Acyl carrier protein) reductase
gene_QJQ45_025081	2.71004	2.34e-07	GCY28_CAEEL	gcy-28	hypothetical protein && sp|Q86GV3|GCY28_CAEEL Receptor-type guanylate cyclase gcy-28 OS=Caenorhabditis elegans OX=6239 GN=gcy-28 PE=1 SV=1 && PF00211:Adenylate and Guanylate cyclase catalytic domain
gene_QJQ45_013676	-1.1916	2.7e-07	CMFB_DICDI	cmfB	hypothetical protein && sp|Q9U641|CMFB_DICDI Conditioned medium factor receptor 1 OS=Dictyostelium discoideum OX=44689 GN=cmfB PE=1 SV=1 && -
gene_QJQ45_023412	-1.36288	2.73e-07	TRNHF_ARATH	At5g06060	hypothetical protein && sp|Q9LHT0|TRNHF_ARATH Tropinone reductase homolog At5g06060 OS=Arabidopsis thaliana OX=3702 GN=At5g06060 PE=2 SV=1 && PF13561:Enoyl-(Acyl carrier protein) reductase
gene_QJQ45_029168	-1.13733	2.75e-07	MTBC_RICCO	RCOM_0591060	hypothetical protein && sp|B9SQI7|MTBC_RICCO Probable bifunctional methylthioribulose-1-phosphate dehydratase/enolase-phosphatase E1 OS=Ricinus communis OX=3988 GN=RCOM_0591060 PE=3 SV=1 && PF00702:haloacid dehalogenase-like hydrolase|PF00596:Class II Aldolase and Adducin N-terminal domain
gene_QJQ45_007900	-1.58103	2.92e-07	TOP2_ARATH	TOP2	hypothetical protein && sp|P30182|TOP2_ARATH DNA topoisomerase 2 OS=Arabidopsis thaliana OX=3702 GN=TOP2 PE=2 SV=2 && PF00521:DNA gyrase/topoisomerase IV, subunit A|PF00204:DNA gyrase B|PF16898:C-terminal associated domain of TOPRIM
gene_QJQ45_012378	-1.65841	2.96e-07	FTSH2_ORYSJ	FTSH2	hypothetical protein && sp|Q655S1|FTSH2_ORYSJ ATP-dependent zinc metalloprotease FTSH 2, chloroplastic OS=Oryza sativa subsp. japonica OX=39947 GN=FTSH2 PE=3 SV=1 && -
novel.166	-1.09105	3.06e-07	CHSTF_HUMAN	CHST15	- && sp|Q7LFX5|CHSTF_HUMAN Carbohydrate sulfotransferase 15 OS=Homo sapiens OX=9606 GN=CHST15 PE=1 SV=1 && -
gene_QJQ45_006951	-2.79285	3.21e-07	H32_BOVIN	#N/A	hypothetical protein && sp|P84227|H32_BOVIN Histone H3.2 OS=Bos taurus OX=9913 PE=1 SV=2 && PF00125:Core histone H2A/H2B/H3/H4
gene_QJQ45_001222	1.61351	3.26e-07	CATL_DROME	#N/A	hypothetical protein && sp|Q95029|CATL_DROME Cathepsin L OS=Drosophila melanogaster OX=7227 GN=Cp1 PE=2 SV=2 && PF00112:Papain family cysteine protease
gene_QJQ45_022898	5.34561	3.28e-07	KPCD1_HUMAN	PRKD1	hypothetical protein && sp|Q15139|KPCD1_HUMAN Serine/threonine-protein kinase D1 OS=Homo sapiens OX=9606 GN=PRKD1 PE=1 SV=2 && PF07714:Protein tyrosine and serine/threonine kinase
gene_QJQ45_017039	1.0327	3.4e-07	RBL10_ARATH	RBL10	hypothetical protein && sp|F4ICF4|RBL10_ARATH RHOMBOID-like protein 10, chloroplastic OS=Arabidopsis thaliana OX=3702 GN=RBL10 PE=2 SV=1 && PF01694:Rhomboid family
novel.4168	1.16475	3.55e-07	CNR10_MAIZE	CNR10	- && sp|D9HP26|CNR10_MAIZE Cell number regulator 10 OS=Zea mays OX=4577 GN=CNR10 PE=2 SV=1 && -
gene_QJQ45_025528	1.09691	3.76e-07	TO402_ARATH	TOM40-2	hypothetical protein && sp|Q9SX55|TO402_ARATH Probable mitochondrial import receptor subunit TOM40-2 OS=Arabidopsis thaliana OX=3702 GN=TOM40-2 PE=1 SV=3 && PF01459:Eukaryotic porin|PF00067:Cytochrome P450|PF00188:Cysteine-rich secretory protein family
gene_QJQ45_008857	-1.12846	4.46e-07	HSP80_SOLLC	HSC80	hypothetical protein && sp|P36181|HSP80_SOLLC Heat shock cognate protein 80 OS=Solanum lycopersicum OX=4081 GN=HSC80 PE=2 SV=1 && PF00183:Hsp90 protein
gene_QJQ45_023836	1.15249	4.86e-07	PPP5_HUMAN	PPP5C	hypothetical protein && sp|P53041|PPP5_HUMAN Serine/threonine-protein phosphatase 5 OS=Homo sapiens OX=9606 GN=PPP5C PE=1 SV=1 && PF08321:PPP5 TPR repeat region|PF00149:Calcineurin-like phosphoesterase
gene_QJQ45_017093	-1.44748	5.06e-07	GUN4_THEFU	celD	hypothetical protein && sp|P26221|GUN4_THEFU Endoglucanase E-4 OS=Thermobifida fusca OX=2021 GN=celD PE=1 SV=2 && PF00759:Glycosyl hydrolase family 9
gene_QJQ45_015811	1.31414	5.39e-07	LPAAT_ORYSJ	Os09g0520200	hypothetical protein && sp|Q0J0A4|LPAAT_ORYSJ Probable 1-acylglycerol-3-phosphate O-acyltransferase OS=Oryza sativa subsp. japonica OX=39947 GN=Os09g0520200 PE=3 SV=3 && PF00561:alpha/beta hydrolase fold
gene_QJQ45_029321	1.20064	5.61e-07	PKHL1_HUMAN	PKHD1L1	hypothetical protein && sp|Q86WI1|PKHL1_HUMAN Fibrocystin-L OS=Homo sapiens OX=9606 GN=PKHD1L1 PE=2 SV=2 && PF01833:IPT/TIG domain|PF10162:G8 domain
gene_QJQ45_011015	-1.19212	6.57e-07	DYH7_HUMAN	DNAH7	hypothetical protein && sp|Q8WXX0|DYH7_HUMAN Dynein axonemal heavy chain 7 OS=Homo sapiens OX=9606 GN=DNAH7 PE=1 SV=2 && PF17852:Dynein heavy chain AAA lid domain|PF12774:Hydrolytic ATP binding site of dynein motor region|PF08393:Dynein heavy chain, N-terminal region 2
gene_QJQ45_015634	-1.08474	6.98e-07	P20D1_XENTR	pm20d1	hypothetical protein && sp|Q08BT9|P20D1_XENTR N-fatty-acyl-amino acid synthase/hydrolase PM20D1 OS=Xenopus tropicalis OX=8364 GN=pm20d1 PE=2 SV=1 && PF01546:Peptidase family M20/M25/M40
gene_QJQ45_026079	-1.06114	7.29e-07	DYH3_HUMAN	DNAH3	hypothetical protein && sp|Q8TD57|DYH3_HUMAN Dynein axonemal heavy chain 3 OS=Homo sapiens OX=9606 GN=DNAH3 PE=2 SV=1 && PF08393:Dynein heavy chain, N-terminal region 2
gene_QJQ45_029735	-1.21553	7.67e-07	FER_CHLRE	PETF	hypothetical protein && sp|P07839|FER_CHLRE Ferredoxin, chloroplastic OS=Chlamydomonas reinhardtii OX=3055 GN=PETF PE=1 SV=2 && PF00111:2Fe-2S iron-sulfur cluster binding domain
gene_QJQ45_024794	-1.02664	7.87e-07	HS901_ARATH	HSP90-1	hypothetical protein && sp|P27323|HS901_ARATH Heat shock protein 90-1 OS=Arabidopsis thaliana OX=3702 GN=HSP90-1 PE=1 SV=3 && -
gene_QJQ45_022818	2.32428	7.89e-07	KPCD1_HUMAN	PRKD1	hypothetical protein && sp|Q15139|KPCD1_HUMAN Serine/threonine-protein kinase D1 OS=Homo sapiens OX=9606 GN=PRKD1 PE=1 SV=2 && PF07714:Protein tyrosine and serine/threonine kinase
gene_QJQ45_006784	2.51341	7.89e-07	YI31B_YEAST	TY3B-I	hypothetical protein && sp|Q7LHG5|YI31B_YEAST Transposon Ty3-I Gag-Pol polyprotein OS=Saccharomyces cerevisiae (strain ATCC 204508 / S288c) OX=559292 GN=TY3B-I PE=1 SV=2 && PF17921:Integrase zinc binding domain|PF17919:RNase H-like domain found in reverse transcriptase|PF00078:Reverse transcriptase (RNA-dependent DNA polymerase)
gene_QJQ45_008388	-1.72882	8.73e-07	CAB6_ARATH	LHCA1	hypothetical protein && sp|Q01667|CAB6_ARATH Chlorophyll a-b binding protein 6, chloroplastic OS=Arabidopsis thaliana OX=3702 GN=LHCA1 PE=1 SV=1 && PF00504:Chlorophyll A-B binding protein
gene_QJQ45_019067	1.28471	8.78e-07	RSP5_CHLRE	RSP5	hypothetical protein && sp|Q27YU7|RSP5_CHLRE Flagellar radial spoke protein 5 OS=Chlamydomonas reinhardtii OX=3055 GN=RSP5 PE=1 SV=1 && PF13499:EF-hand domain pair|PF00248:Aldo/keto reductase family
novel.6111	-2.63884	9.33e-07	KAT3_ARATH	KAT3	- && sp|P92960|KAT3_ARATH Potassium channel KAT3 OS=Arabidopsis thaliana OX=3702 GN=KAT3 PE=1 SV=1 && PF00520:Ion transport protein
gene_QJQ45_021498	1.40628	9.74e-07	YI31B_YEAST	TY3B-I	hypothetical protein && sp|Q7LHG5|YI31B_YEAST Transposon Ty3-I Gag-Pol polyprotein OS=Saccharomyces cerevisiae (strain ATCC 204508 / S288c) OX=559292 GN=TY3B-I PE=1 SV=2 && PF00665:Integrase core domain|PF17917:RNase H-like domain found in reverse transcriptase|PF17921:Integrase zinc binding domain|PF00385:Chromo (CHRromatin Organisation MOdifier) domain|PF00078:Reverse transcriptase (RNA-depende…
gene_QJQ45_005969	-1.15648	1.08e-06	CYP1_SOYBN	Cyp1	hypothetical protein && sp|Q8W171|CYP1_SOYBN Peptidyl-prolyl cis-trans isomerase 1 OS=Glycine max OX=3847 GN=Cyp1 PE=2 SV=1 && -
novel.7659	1.26015	1.16e-06	END8A_MYCBO	#N/A	- && sp|P64159|END8A_MYCBO Endonuclease 8 1 OS=Mycobacterium bovis (strain ATCC BAA-935 / AF2122/97) OX=233413 GN=nei1 PE=3 SV=3 && PF06831:Formamidopyrimidine-DNA glycosylase H2TH domain
gene_QJQ45_015108	2.0988	1.36e-06	POL3_DROME	pol	hypothetical protein && sp|P04323|POL3_DROME Retrovirus-related Pol polyprotein from transposon 17.6 OS=Drosophila melanogaster OX=7227 GN=pol PE=4 SV=1 && PF17921:Integrase zinc binding domain|PF00385:Chromo (CHRromatin Organisation MOdifier) domain|PF17917:RNase H-like domain found in reverse transcriptase|PF00078:Reverse transcriptase (RNA-dependent DNA polymerase)
gene_QJQ45_017594	1.01149	1.57e-06	YI31B_YEAST	TY3B-I	hypothetical protein && sp|Q7LHG5|YI31B_YEAST Transposon Ty3-I Gag-Pol polyprotein OS=Saccharomyces cerevisiae (strain ATCC 204508 / S288c) OX=559292 GN=TY3B-I PE=1 SV=2 && PF00385:Chromo (CHRromatin Organisation MOdifier) domain|PF17917:RNase H-like domain found in reverse transcriptase|PF00078:Reverse transcriptase (RNA-dependent DNA polymerase)|PF17921:Integrase zinc binding domain|PF00665:Int…
gene_QJQ45_027115	1.33983	1.71e-06	UPM1_ARATH	UPM1	hypothetical protein && sp|Q42606|UPM1_ARATH S-adenosyl-L-methionine-dependent uroporphyrinogen III methyltransferase, chloroplastic OS=Arabidopsis thaliana OX=3702 GN=UPM1 PE=1 SV=1 && PF00590:Tetrapyrrole (Corrin/Porphyrin) Methylases
gene_QJQ45_026528	-1.77546	1.78e-06	CYAA_LACKL	CYR1	hypothetical protein && sp|P23466|CYAA_LACKL Adenylate cyclase OS=Lachancea kluyveri OX=4934 GN=CYR1 PE=3 SV=1 && -
gene_QJQ45_027117	2.32095	2.08e-06	TF212_SCHPO	Tf2-12	hypothetical protein && sp|P0CT41|TF212_SCHPO Transposon Tf2-12 polyprotein OS=Schizosaccharomyces pombe (strain 972 / ATCC 24843) OX=284812 GN=Tf2-12 PE=3 SV=1 && PF00078:Reverse transcriptase (RNA-dependent DNA polymerase)|PF17917:RNase H-like domain found in reverse transcriptase|PF03732:Retrotransposon gag protein|PF17921:Integrase zinc binding domain
gene_QJQ45_023653	-1.11862	2.12e-06	POLX_TOBAC	#N/A	hypothetical protein && sp|P10978|POLX_TOBAC Retrovirus-related Pol polyprotein from transposon TNT 1-94 OS=Nicotiana tabacum OX=4097 PE=2 SV=1 && PF13976:GAG-pre-integrase domain|PF14223:gag-polypeptide of LTR copia-type|PF00665:Integrase core domain
gene_QJQ45_027851	3.70185	2.14e-06	NAP_BACSU	nap	hypothetical protein && sp|P96688|NAP_BACSU Uncharacterized carboxylesterase nap OS=Bacillus subtilis (strain 168) OX=224308 GN=nap PE=1 SV=1 && PF12697:Alpha/beta hydrolase family
gene_QJQ45_025011	1.48649	2.14e-06	GCYB1_MOUSE	Gucy1b1	hypothetical protein && sp|O54865|GCYB1_MOUSE Guanylate cyclase soluble subunit beta-1 OS=Mus musculus OX=10090 GN=Gucy1b1 PE=1 SV=1 && PF00069:Protein kinase domain|PF07700:Haem-NO-binding|PF07701:Heme NO binding associated
gene_QJQ45_009487	3.611	2.25e-06	CGS6_YEAST	CLB6	hypothetical protein && sp|P32943|CGS6_YEAST S-phase entry cyclin-6 OS=Saccharomyces cerevisiae (strain ATCC 204508 / S288c) OX=559292 GN=CLB6 PE=1 SV=2 && PF00134:Cyclin, N-terminal domain
novel.6063	-1.33497	2.46e-06	SEPR_THESR	#N/A	- && sp|P80146|SEPR_THESR Extracellular serine proteinase OS=Thermus sp. (strain Rt41A) OX=32063 PE=1 SV=3 && PF00082:Subtilase family
gene_QJQ45_003510	-1.18481	2.65e-06	LAF3_ARATH	LAF3	hypothetical protein && sp|A0A1I9LN01|LAF3_ARATH Protein LONG AFTER FAR-RED 3 OS=Arabidopsis thaliana OX=3702 GN=LAF3 PE=2 SV=1 && PF07969:Amidohydrolase family
gene_QJQ45_020816	1.99199	2.66e-06	CRYD_OSTTA	Ot01g06470	hypothetical protein && sp|Q5IFN2|CRYD_OSTTA Cryptochrome DASH, chloroplastic/mitochondrial OS=Ostreococcus tauri OX=70448 GN=Ot01g06470 PE=3 SV=1 && PF00875:DNA photolyase
gene_QJQ45_012500	1.90117	2.71e-06	GUN14_ORYSJ	Os05g0129200	hypothetical protein && sp|P0C1U5|GUN14_ORYSJ Endoglucanase 14 OS=Oryza sativa subsp. japonica OX=39947 GN=Os05g0129200 PE=2 SV=1 && PF13641:Glycosyltransferase like family 2|PF00759:Glycosyl hydrolase family 9
novel.7081	1.74973	2.74e-06	KCNH6_CHICK	#N/A	- && sp|Q9PT84|KCNH6_CHICK Potassium voltage-gated channel subfamily H member 6 OS=Gallus gallus OX=9031 GN=KCNH6 PE=2 SV=2 && PF00520:Ion transport protein
gene_QJQ45_014064	-1.57693	2.88e-06	SRP14_ARATH	SRP14	hypothetical protein && sp|O04421|SRP14_ARATH Signal recognition particle 14 kDa protein OS=Arabidopsis thaliana OX=3702 GN=SRP14 PE=2 SV=2 && PF02290:Signal recognition particle 14kD protein
gene_QJQ45_023235	1.26087	3.01e-06	Y1242_ZYMMO	ZMO1242	hypothetical protein && sp|P30795|Y1242_ZYMMO Uncharacterized protein ZMO1242 OS=Zymomonas mobilis subsp. mobilis (strain ATCC 31821 / ZM4 / CP4) OX=264203 GN=ZMO1242 PE=4 SV=2 && PF00246:Zinc carboxypeptidase
novel.3962	-1.58325	3.45e-06	ARI2_ARATH	ARI2	- && sp|Q84RR2|ARI2_ARATH Probable E3 ubiquitin-protein ligase ARI2 OS=Arabidopsis thaliana OX=3702 GN=ARI2 PE=2 SV=1 && PF01485:IBR domain, a half RING-finger domain
novel.2497	1.20418	3.47e-06	PAP12_ARATH	PAP12	- && sp|Q8LAP6|PAP12_ARATH Probable plastid-lipid-associated protein 12, chloroplastic OS=Arabidopsis thaliana OX=3702 GN=PAP12 PE=1 SV=1 && -
gene_QJQ45_017859	6.29268	4.93e-06	GUN4_THEFU	celD	hypothetical protein && sp|P26221|GUN4_THEFU Endoglucanase E-4 OS=Thermobifida fusca OX=2021 GN=celD PE=1 SV=2 && PF00759:Glycosyl hydrolase family 9
gene_QJQ45_030189	1.92851	5.46e-06	M3K10_HUMAN	MAP3K10	hypothetical protein && sp|Q02779|M3K10_HUMAN Mitogen-activated protein kinase kinase kinase 10 OS=Homo sapiens OX=9606 GN=MAP3K10 PE=1 SV=3 && PF00069:Protein kinase domain
gene_QJQ45_010113	-1.71832	5.49e-06	APM1D_ORYSJ	Os09g0362800	hypothetical protein && sp|Q6K4E7|APM1D_ORYSJ Aminopeptidase M1-D OS=Oryza sativa subsp. japonica OX=39947 GN=Os09g0362800 PE=2 SV=1 && PF11838:ERAP1-like C-terminal domain|PF17900:Peptidase M1 N-terminal domain|PF01433:Peptidase family M1 domain
novel.4465	1.22018	5.68e-06	GUNA_BACPU	eglA	- && sp|Q5YLG1|GUNA_BACPU Endoglucanase A OS=Bacillus pumilus OX=1408 GN=eglA PE=1 SV=1 && PF00759:Glycosyl hydrolase family 9
gene_QJQ45_018740	-1.02678	6.22e-06	ANTR1_ARATH	ANTR1	hypothetical protein && sp|O82390|ANTR1_ARATH Sodium-dependent phosphate transport protein 1, chloroplastic OS=Arabidopsis thaliana OX=3702 GN=ANTR1 PE=1 SV=1 && PF07690:Major Facilitator Superfamily
gene_QJQ45_029159	-1.15312	6.93e-06	Y1099_ARATH	At1g60990	hypothetical protein && sp|Q681Y3|Y1099_ARATH Putative transferase At1g60990, chloroplastic OS=Arabidopsis thaliana OX=3702 GN=At1g60990 PE=1 SV=1 && PF01571:Aminomethyltransferase folate-binding domain
gene_QJQ45_024332	1.3436	7.22e-06	UTP25_CLAL4	#N/A	hypothetical protein && sp|C4XWY8|UTP25_CLAL4 U3 small nucleolar RNA-associated protein 25 OS=Clavispora lusitaniae (strain ATCC 42720) OX=306902 GN=UTP25 PE=3 SV=1 && PF06862:Utp25, U3 small nucleolar RNA-associated SSU processome protein 25
gene_QJQ45_013820	4.0197	7.31e-06	PSBS1_CHLRE	PSBS1	hypothetical protein && sp|A8HPM2|PSBS1_CHLRE Photosystem II protein PSBS1 OS=Chlamydomonas reinhardtii OX=3055 GN=PSBS1 PE=1 SV=1 && -
gene_QJQ45_018084	1.2359	7.96e-06	CYAA_YEAST	CYR1	hypothetical protein && sp|P08678|CYAA_YEAST Adenylate cyclase OS=Saccharomyces cerevisiae (strain ATCC 204508 / S288c) OX=559292 GN=CYR1 PE=1 SV=2 && PF01547:Bacterial extracellular solute-binding protein|PF01184:GPR1/FUN34/yaaH family
gene_QJQ45_012668	-1.2588	8.39e-06	YI31B_YEAST	TY3B-I	hypothetical protein && sp|Q7LHG5|YI31B_YEAST Transposon Ty3-I Gag-Pol polyprotein OS=Saccharomyces cerevisiae (strain ATCC 204508 / S288c) OX=559292 GN=TY3B-I PE=1 SV=2 && PF00078:Reverse transcriptase (RNA-dependent DNA polymerase)|PF17921:Integrase zinc binding domain|PF17919:RNase H-like domain found in reverse transcriptase|PF00385:Chromo (CHRromatin Organisation MOdifier) domain
gene_QJQ45_009073	-3.05175	8.49e-06	HS16A_WHEAT	hsp16.9A	hypothetical protein && sp|P12810|HS16A_WHEAT 16.9 kDa class I heat shock protein 1 OS=Triticum aestivum OX=4565 GN=hsp16.9A PE=2 SV=1 && PF00011:Hsp20/alpha crystallin family
gene_QJQ45_004109	-1.08	8.79e-06	AMPN_RABIT	ANPEP	hypothetical protein && sp|P15541|AMPN_RABIT Aminopeptidase N OS=Oryctolagus cuniculus OX=9986 GN=ANPEP PE=1 SV=4 && PF11838:ERAP1-like C-terminal domain|PF01433:Peptidase family M1 domain
gene_QJQ45_021037	-1.0431	9.17e-06	DPOLA_ORYSJ	Os01g0868300	hypothetical protein && sp|O48653|DPOLA_ORYSJ DNA polymerase alpha catalytic subunit OS=Oryza sativa subsp. japonica OX=39947 GN=Os01g0868300 PE=2 SV=2 && PF00136:DNA polymerase family B|PF12254:DNA polymerase alpha subunit p180 N terminal|PF08996:DNA Polymerase alpha zinc finger
gene_QJQ45_028978	1.76128	9.65e-06	CDPKJ_ORYSJ	CPK19	hypothetical protein && sp|P53683|CDPKJ_ORYSJ Calcium-dependent protein kinase 19 OS=Oryza sativa subsp. japonica OX=39947 GN=CPK19 PE=2 SV=2 && PF00069:Protein kinase domain
gene_QJQ45_018920	-1.56171	9.92e-06	BAS1_ORYSJ	BAS1	hypothetical protein && sp|Q6ER94|BAS1_ORYSJ 2-Cys peroxiredoxin BAS1, chloroplastic OS=Oryza sativa subsp. japonica OX=39947 GN=BAS1 PE=1 SV=1 && PF00578:AhpC/TSA family
gene_QJQ45_024925	1.08767	1.02e-05	SMC3_ARATH	SMC3	hypothetical protein && sp|Q56YN8|SMC3_ARATH Structural maintenance of chromosomes protein 3 OS=Arabidopsis thaliana OX=3702 GN=SMC3 PE=2 SV=1 && PF06470:SMC proteins Flexible Hinge Domain|PF01593:Flavin containing amine oxidoreductase|PF02463:RecF/RecN/SMC N terminal domain
gene_QJQ45_000649	-1.35362	1.04e-05	KIF1_DICDI	kif1	hypothetical protein && sp|Q9NGQ2|KIF1_DICDI Kinesin-related protein 1 OS=Dictyostelium discoideum OX=44689 GN=kif1 PE=1 SV=1 && PF00225:Kinesin motor domain
gene_QJQ45_025290	-1.41012	1.07e-05	ANTR6_ARATH	ANTR6	hypothetical protein && sp|Q3E9A0|ANTR6_ARATH Probable anion transporter 6, chloroplastic OS=Arabidopsis thaliana OX=3702 GN=ANTR6 PE=2 SV=1 && PF07690:Major Facilitator Superfamily
gene_QJQ45_002824	3.50069	1.09e-05	GUN4_BACS5	#N/A	hypothetical protein && sp|P28622|GUN4_BACS5 Endoglucanase 4 OS=Bacillus sp. (strain KSM-522) OX=120046 PE=3 SV=2 && PF00759:Glycosyl hydrolase family 9
gene_QJQ45_006648	2.27022	1.12e-05	NIA_VOLCA	NITA	hypothetical protein && sp|P36841|NIA_VOLCA Nitrate reductase [NADH] OS=Volvox carteri OX=3067 GN=NITA PE=2 SV=1 && PF00174:Oxidoreductase molybdopterin binding domain|PF00173:Cytochrome b5-like Heme/Steroid binding domain|PF00970:Oxidoreductase FAD-binding domain|PF03404:Mo-co oxidoreductase dimerisation domain|PF00175:Oxidoreductase NAD-binding domain
gene_QJQ45_028516	-3.82244	1.25e-05	CAAT1_ARATH	CAT1	hypothetical protein && sp|Q84MA5|CAAT1_ARATH Cationic amino acid transporter 1 OS=Arabidopsis thaliana OX=3702 GN=CAT1 PE=1 SV=1 && PF13906:C-terminus of AA_permease|PF13520:Amino acid permease
gene_QJQ45_029016	-2.08397	1.31e-05	CHLD_TOBAC	CHLD	hypothetical protein && sp|O24133|CHLD_TOBAC Magnesium-chelatase subunit ChlD, chloroplastic OS=Nicotiana tabacum OX=4097 GN=CHLD PE=2 SV=1 && PF13519:von Willebrand factor type A domain|PF17863:AAA lid domain
gene_QJQ45_027963	-1.10128	1.31e-05	KHSE_NITHX	thrB	hypothetical protein && sp|Q1QH29|KHSE_NITHX Homoserine kinase OS=Nitrobacter hamburgensis (strain DSM 10229 / NCIMB 13809 / X14) OX=323097 GN=thrB PE=3 SV=1 && PF01636:Phosphotransferase enzyme family
gene_QJQ45_016753	-2.16436	1.33e-05	UAPA_EMENI	uapA	hypothetical protein && sp|Q07307|UAPA_EMENI Uric acid-xanthine permease OS=Emericella nidulans (strain FGSC A4 / ATCC 38163 / CBS 112.46 / NRRL 194 / M139) OX=227321 GN=uapA PE=1 SV=3 && PF00860:Permease family
gene_QJQ45_003323	-1.74067	1.36e-05	BDH_MOUSE	Bdh1	hypothetical protein && sp|Q80XN0|BDH_MOUSE D-beta-hydroxybutyrate dehydrogenase, mitochondrial OS=Mus musculus OX=10090 GN=Bdh1 PE=1 SV=2 && PF00106:short chain dehydrogenase
gene_QJQ45_002180	1.93878	1.38e-05	POLX_TOBAC	#N/A	hypothetical protein && sp|P10978|POLX_TOBAC Retrovirus-related Pol polyprotein from transposon TNT 1-94 OS=Nicotiana tabacum OX=4097 PE=2 SV=1 && PF07727:Reverse transcriptase (RNA-dependent DNA polymerase)
gene_QJQ45_026113	-1.91724	1.43e-05	POC16_CHLRE	POC16	hypothetical protein && sp|A8JAN3|POC16_CHLRE Centriole proteome protein 16 OS=Chlamydomonas reinhardtii OX=3055 GN=POC16 PE=1 SV=1 && -
gene_QJQ45_019168	-2.30743	1.63e-05	ZNFX1_MOUSE	Znfx1	hypothetical protein && sp|Q8R151|ZNFX1_MOUSE NFX1-type zinc finger-containing protein 1 OS=Mus musculus OX=10090 GN=Znfx1 PE=1 SV=3 && PF13087:AAA domain|PF13086:AAA domain
novel.8103	-3.397	1.66e-05	ARI1_ARATH	ARI1	- && sp|Q949V6|ARI1_ARATH Probable E3 ubiquitin-protein ligase ARI1 OS=Arabidopsis thaliana OX=3702 GN=ARI1 PE=2 SV=1 && -
gene_QJQ45_009743	1.13594	1.7e-05	DTX16_ARATH	DTX16	hypothetical protein && sp|Q9FHB6|DTX16_ARATH Protein DETOXIFICATION 16 OS=Arabidopsis thaliana OX=3702 GN=DTX16 PE=2 SV=1 && PF01554:MatE
gene_QJQ45_026214	-1.04171	1.77e-05	Y9955_DICDI	DDB_G0267514	hypothetical protein && sp|Q55GU0|Y9955_DICDI Probable serine/threonine-protein kinase DDB_G0267514 OS=Dictyostelium discoideum OX=44689 GN=DDB_G0267514 PE=3 SV=1 && PF00069:Protein kinase domain
gene_QJQ45_022406	2.56064	1.79e-05	EXO1_ARATH	EXO1	hypothetical protein && sp|Q8L6Z7|EXO1_ARATH Exonuclease 1 OS=Arabidopsis thaliana OX=3702 GN=EXO1 PE=2 SV=2 && PF00867:XPG I-region|PF00752:XPG N-terminal domain
gene_QJQ45_021205	-1.36979	1.81e-05	LTD_ARATH	LTD	hypothetical protein && sp|Q8VY88|LTD_ARATH Protein LHCP TRANSLOCATION DEFECT OS=Arabidopsis thaliana OX=3702 GN=LTD PE=1 SV=1 && PF14953:Domain of unknown function (DUF4504)
gene_QJQ45_021986	2.50804	1.9e-05	RNZ1_ARATH	TRZ1	hypothetical protein && sp|Q8LGU7|RNZ1_ARATH tRNase Z TRZ1 OS=Arabidopsis thaliana OX=3702 GN=TRZ1 PE=1 SV=3 && PF04051:Transport protein particle (TRAPP) component|PF12706:Beta-lactamase superfamily domain
gene_QJQ45_014966	1.70122	2.01e-05	Y3684_ARATH	#N/A	hypothetical protein && sp|Q9LW26|Y3684_ARATH Acyltransferase-like protein At3g26840, chloroplastic OS=Arabidopsis thaliana OX=3702 GN=At3g26840 PE=1 SV=1 && -
novel.25	-5.66971	2.03e-05	ARID3_ARATH	#N/A	- && sp|Q940Y3|ARID3_ARATH AT-rich interactive domain-containing protein 3 OS=Arabidopsis thaliana OX=3702 GN=ARID3 PE=1 SV=1 && -
novel.6131	1.03933	2.07e-05	MBD4_MOUSE	Mbd4	- && sp|Q9Z2D7|MBD4_MOUSE Methyl-CpG-binding domain protein 4 OS=Mus musculus OX=10090 GN=Mbd4 PE=1 SV=1 && -
gene_QJQ45_002668	-1.24706	2.18e-05	ISOC2_XENTR	isoc2	hypothetical protein && sp|Q6DF67|ISOC2_XENTR Isochorismatase domain-containing protein 2 OS=Xenopus tropicalis OX=8364 GN=isoc2 PE=2 SV=1 && PF00857:Isochorismatase family
gene_QJQ45_001632	-1.15447	2.21e-05	LIL31_ARATH	LIL3.1	hypothetical protein && sp|Q9SYX1|LIL31_ARATH Light-harvesting complex-like protein 3 isotype 1, chloroplastic OS=Arabidopsis thaliana OX=3702 GN=LIL3.1 PE=1 SV=1 && -
novel.8068	2.46528	2.26e-05	CDKL4_MOUSE	Cdkl4	- && sp|Q3TZA2|CDKL4_MOUSE Cyclin-dependent kinase-like 4 OS=Mus musculus OX=10090 GN=Cdkl4 PE=2 SV=1 && PF00069:Protein kinase domain
gene_QJQ45_021792	4.34804	2.36e-05	NIA_VOLCA	NITA	hypothetical protein && sp|P36841|NIA_VOLCA Nitrate reductase [NADH] OS=Volvox carteri OX=3067 GN=NITA PE=2 SV=1 && PF03404:Mo-co oxidoreductase dimerisation domain|PF00175:Oxidoreductase NAD-binding domain|PF00173:Cytochrome b5-like Heme/Steroid binding domain|PF00970:Oxidoreductase FAD-binding domain|PF00174:Oxidoreductase molybdopterin binding domain
gene_QJQ45_030464	1.70528	2.55e-05	MF6LA_XENLA	mfsd6l-a	hypothetical protein && sp|Q68EU6|MF6LA_XENLA Major facilitator superfamily domain-containing protein 6-like protein A OS=Xenopus laevis OX=8355 GN=mfsd6l-a PE=2 SV=1 && PF12832:MFS_1 like family
gene_QJQ45_019965	-1.004	2.81e-05	MYB77_ARATH	MYB77	hypothetical protein && sp|Q9SN12|MYB77_ARATH Transcription factor MYB77 OS=Arabidopsis thaliana OX=3702 GN=MYB77 PE=1 SV=1 && PF00249:Myb-like DNA-binding domain
gene_QJQ45_001319	1.68832	3.13e-05	YTX2_XENLA	#N/A	hypothetical protein && sp|P14381|YTX2_XENLA Transposon TX1 uncharacterized 149 kDa protein OS=Xenopus laevis OX=8355 PE=4 SV=1 && PF00078:Reverse transcriptase (RNA-dependent DNA polymerase)
gene_QJQ45_007355	-1.72831	3.25e-05	VWKA_DICDI	vwkA	hypothetical protein && sp|Q6B9X6|VWKA_DICDI Alpha-protein kinase vwkA OS=Dictyostelium discoideum OX=44689 GN=vwkA PE=1 SV=1 && -
gene_QJQ45_026218	-1.17384	3.78e-05	DRP5A_ARATH	DRP5A	hypothetical protein && sp|F4HPR5|DRP5A_ARATH Dynamin-related protein 5A OS=Arabidopsis thaliana OX=3702 GN=DRP5A PE=2 SV=1 && PF00350:Dynamin family
gene_QJQ45_020302	1.12376	3.91e-05	UFD1_HUMAN	UFD1	hypothetical protein && sp|Q92890|UFD1_HUMAN Ubiquitin recognition factor in ER-associated degradation protein 1 OS=Homo sapiens OX=9606 GN=UFD1 PE=1 SV=3 && PF03152:Ubiquitin fusion degradation protein UFD1
gene_QJQ45_018107	2.67637	3.92e-05	CDPK2_PLAF7	CDPK2	hypothetical protein && sp|Q8ICR0|CDPK2_PLAF7 Calcium-dependent protein kinase 2 OS=Plasmodium falciparum (isolate 3D7) OX=36329 GN=CDPK2 PE=1 SV=3 && PF00069:Protein kinase domain
novel.2143	-4.11704	4.23e-05	NTM1_ARATH	At5g44450	- && sp|Q5PP70|NTM1_ARATH Alpha N-terminal protein methyltransferase 1 OS=Arabidopsis thaliana OX=3702 GN=At5g44450 PE=2 SV=1 && PF05891:AdoMet dependent proline di-methyltransferase
gene_QJQ45_003113	1.51615	4.36e-05	POLX_TOBAC	#N/A	hypothetical protein && sp|P10978|POLX_TOBAC Retrovirus-related Pol polyprotein from transposon TNT 1-94 OS=Nicotiana tabacum OX=4097 PE=2 SV=1 && PF14223:gag-polypeptide of LTR copia-type|PF07727:Reverse transcriptase (RNA-dependent DNA polymerase)|PF13976:GAG-pre-integrase domain
gene_QJQ45_024096	-1.38361	4.59e-05	GPX1_SCHPO	gpx1	hypothetical protein && sp|O59858|GPX1_SCHPO Glutathione peroxidase-like peroxiredoxin gpx1 OS=Schizosaccharomyces pombe (strain 972 / ATCC 24843) OX=284812 GN=gpx1 PE=1 SV=1 && PF00255:Glutathione peroxidase
gene_QJQ45_019455	1.24101	4.69e-05	GUN23_ORYSJ	GLU12	hypothetical protein && sp|Q69NF5|GUN23_ORYSJ Endoglucanase 23 OS=Oryza sativa subsp. japonica OX=39947 GN=GLU12 PE=2 SV=1 && PF00759:Glycosyl hydrolase family 9
novel.6279	-1.17631	4.8e-05	RCBT1_MOUSE	#N/A	- && sp|Q6NXM2|RCBT1_MOUSE RCC1 and BTB domain-containing protein 1 OS=Mus musculus OX=10090 GN=Rcbtb1 PE=1 SV=1 && -
gene_QJQ45_030451	-1.18192	5.33e-05	BCH_HAELA	CRTZ	hypothetical protein && sp|Q9SPK6|BCH_HAELA Beta-carotene 3-hydroxylase, chloroplastic (Fragment) OS=Haematococcus lacustris OX=44745 GN=CRTZ PE=2 SV=1 && PF04116:Fatty acid hydroxylase
gene_QJQ45_030495	1.35004	5.42e-05	AB8A_ARATH	ABCA8	hypothetical protein && sp|Q8LPK0|AB8A_ARATH ABC transporter A family member 8 OS=Arabidopsis thaliana OX=3702 GN=ABCA8 PE=2 SV=3 && -
gene_QJQ45_027657	1.43915	5.63e-05	GLE_CHLRE	#N/A	hypothetical protein && sp|P31178|GLE_CHLRE Autolysin OS=Chlamydomonas reinhardtii OX=3055 PE=1 SV=1 && PF05548:Gametolysin peptidase M11
gene_QJQ45_029030	-1.75815	6.09e-05	TRM6_BOVIN	TRMT6	hypothetical protein && sp|Q2T9V5|TRM6_BOVIN tRNA (adenine(58)-N(1))-methyltransferase non-catalytic subunit TRM6 OS=Bos taurus OX=9913 GN=TRMT6 PE=2 SV=1 && PF04189:Gcd10p family|PF05648:Peroxisomal biogenesis factor 11 (PEX11)
gene_QJQ45_015816	-1.84047	6.48e-05	ALFC_CHLRE	ALDCHL	hypothetical protein && sp|Q42690|ALFC_CHLRE Fructose-bisphosphate aldolase 1, chloroplastic OS=Chlamydomonas reinhardtii OX=3055 GN=ALDCHL PE=2 SV=2 && PF00274:Fructose-bisphosphate aldolase class-I
gene_QJQ45_006362	-2.16044	6.55e-05	DEGP1_ARATH	DEGP1	hypothetical protein && sp|O22609|DEGP1_ARATH Protease Do-like 1, chloroplastic OS=Arabidopsis thaliana OX=3702 GN=DEGP1 PE=1 SV=2 && -
gene_QJQ45_012630	-2.66528	7.04e-05	BAS1_ORYSJ	BAS1	hypothetical protein && sp|Q6ER94|BAS1_ORYSJ 2-Cys peroxiredoxin BAS1, chloroplastic OS=Oryza sativa subsp. japonica OX=39947 GN=BAS1 PE=1 SV=1 && PF00578:AhpC/TSA family
gene_QJQ45_006269	-1.41933	7.23e-05	ALB31_CHLRE	ALB3.1	hypothetical protein && sp|Q8S339|ALB31_CHLRE Inner membrane ALBINO3-like protein 1, chloroplastic OS=Chlamydomonas reinhardtii OX=3055 GN=ALB3.1 PE=3 SV=1 && PF02096:60Kd inner membrane protein
gene_QJQ45_001375	1.34722	7.61e-05	H41_WHEAT	#N/A	hypothetical protein && sp|P62785|H41_WHEAT Histone H4 variant TH011 OS=Triticum aestivum OX=4565 PE=3 SV=2 && -
gene_QJQ45_024595	-1.27349	7.86e-05	POL5_DROME	pol	hypothetical protein && sp|Q8I7P9|POL5_DROME Retrovirus-related Pol polyprotein from transposon opus OS=Drosophila melanogaster OX=7227 GN=pol PE=4 SV=1 && PF00628:PHD-finger|PF17921:Integrase zinc binding domain|PF00385:Chromo (CHRromatin Organisation MOdifier) domain|PF17917:RNase H-like domain found in reverse transcriptase|PF00078:Reverse transcriptase (RNA-dependent DNA polymerase)
gene_QJQ45_004522	2.20654	7.98e-05	GUN11_ORYSJ	GLU4	hypothetical protein && sp|Q7XTH4|GUN11_ORYSJ Endoglucanase 11 OS=Oryza sativa subsp. japonica OX=39947 GN=GLU4 PE=2 SV=3 && PF00759:Glycosyl hydrolase family 9
gene_QJQ45_023902	1.04603	8.76e-05	YI31B_YEAST	TY3B-I	hypothetical protein && sp|Q7LHG5|YI31B_YEAST Transposon Ty3-I Gag-Pol polyprotein OS=Saccharomyces cerevisiae (strain ATCC 204508 / S288c) OX=559292 GN=TY3B-I PE=1 SV=2 && PF17917:RNase H-like domain found in reverse transcriptase|PF00078:Reverse transcriptase (RNA-dependent DNA polymerase)|PF17921:Integrase zinc binding domain|PF00665:Integrase core domain|PF00385:Chromo (CHRromatin Organisatio…
novel.5219	2.76723	9.06e-05	CAH1_CHLRE	CAH1	- && sp|P20507|CAH1_CHLRE Carbonic anhydrase 1 OS=Chlamydomonas reinhardtii OX=3055 GN=CAH1 PE=1 SV=1 && -
gene_QJQ45_012404	2.56953	9.82e-05	ARL8_DROME	Arl8	hypothetical protein && sp|Q9VHV5|ARL8_DROME ADP-ribosylation factor-like protein 8 OS=Drosophila melanogaster OX=7227 GN=Arl8 PE=1 SV=1 && PF00025:ADP-ribosylation factor family
gene_QJQ45_013516	-1.28577	0.000100209	TMN7_ARATH	TMN7	hypothetical protein && sp|Q9LIC2|TMN7_ARATH Transmembrane 9 superfamily member 7 OS=Arabidopsis thaliana OX=3702 GN=TMN7 PE=2 SV=1 && PF19259:Ty3 transposon capsid-like protein|PF17917:RNase H-like domain found in reverse transcriptase|PF02990:Endomembrane protein 70|PF17921:Integrase zinc binding domain|PF00078:Reverse transcriptase (RNA-dependent DNA polymerase)
gene_QJQ45_006119	1.03394	0.000100349	DTX45_ARATH	DTX45	hypothetical protein && sp|Q9SVE7|DTX45_ARATH Protein DETOXIFICATION 45, chloroplastic OS=Arabidopsis thaliana OX=3702 GN=DTX45 PE=2 SV=2 && PF01554:MatE
gene_QJQ45_016773	-1.33068	0.000101865	POLR_DROME	pol	hypothetical protein && sp|P16423|POLR_DROME Retrovirus-related Pol polyprotein from type-2 retrotransposable element R2DM OS=Drosophila melanogaster OX=7227 GN=pol PE=4 SV=1 && PF03372:Endonuclease/Exonuclease/phosphatase family|PF00078:Reverse transcriptase (RNA-dependent DNA polymerase)|PF00075:RNase H|PF04934:MED6 mediator sub complex component
gene_QJQ45_006945	-1.47374	0.000104215	H32_BOVIN	#N/A	hypothetical protein && sp|P84227|H32_BOVIN Histone H3.2 OS=Bos taurus OX=9913 PE=1 SV=2 && PF00125:Core histone H2A/H2B/H3/H4
gene_QJQ45_030267	-1.88259	0.000106507	CLASP_ARATH	CLASP	hypothetical protein && sp|Q8RWY6|CLASP_ARATH CLIP-associated protein OS=Arabidopsis thaliana OX=3702 GN=CLASP PE=1 SV=1 && PF12348:CLASP N terminal|PF21040:Centrosomal protein CEP104-like, TOG domain
gene_QJQ45_012406	1.8031	0.000109234	SYP51_ARATH	SYP51	hypothetical protein && sp|Q9SA23|SYP51_ARATH Syntaxin-51 OS=Arabidopsis thaliana OX=3702 GN=SYP51 PE=1 SV=1 && -
gene_QJQ45_030065	1.55258	0.000112507	PCH2_ORYSI	OsI_16324	hypothetical protein && sp|A2XUN8|PCH2_ORYSI Pachytene checkpoint protein 2 homolog OS=Oryza sativa subsp. indica OX=39946 GN=OsI_16324 PE=3 SV=2 && PF10230:Lipid-droplet associated hydrolase|PF00004:ATPase family associated with various cellular activities (AAA)|PF00078:Reverse transcriptase (RNA-dependent DNA polymerase)
gene_QJQ45_010717	-1.36374	0.00011338	D2HDH_ARATH	D2HGDH	hypothetical protein && sp|O23240|D2HDH_ARATH D-2-hydroxyglutarate dehydrogenase, mitochondrial OS=Arabidopsis thaliana OX=3702 GN=D2HGDH PE=1 SV=3 && PF01565:FAD binding domain|PF02913:FAD linked oxidases, C-terminal domain
novel.4989	2.04866	0.000113397	GFT1_ARATH	GFT1	- && sp|Q84L08|GFT1_ARATH GDP-fucose transporter 1 OS=Arabidopsis thaliana OX=3702 GN=GFT1 PE=1 SV=1 && -
gene_QJQ45_022435	1.92653	0.000115019	POLX_TOBAC	#N/A	hypothetical protein && sp|P10978|POLX_TOBAC Retrovirus-related Pol polyprotein from transposon TNT 1-94 OS=Nicotiana tabacum OX=4097 PE=2 SV=1 && PF13976:GAG-pre-integrase domain|PF14223:gag-polypeptide of LTR copia-type|PF07727:Reverse transcriptase (RNA-dependent DNA polymerase)
gene_QJQ45_029876	-1.90404	0.000115083	DEXH1_ARATH	At2g35920	hypothetical protein && sp|F4ILR7|DEXH1_ARATH DExH-box ATP-dependent RNA helicase DExH1 OS=Arabidopsis thaliana OX=3702 GN=At2g35920 PE=2 SV=1 && PF00271:Helicase conserved C-terminal domain
gene_QJQ45_022565	-1.13895	0.000115567	BBS7_HUMAN	BBS7	hypothetical protein && sp|Q8IWZ6|BBS7_HUMAN Bardet-Biedl syndrome 7 protein OS=Homo sapiens OX=9606 GN=BBS7 PE=1 SV=2 && -
gene_QJQ45_024583	1.89848	0.000115633	IMCL1_ORYSJ	IMCEL1	hypothetical protein && sp|Q5Z9I2|IMCL1_ORYSJ Probable isoprenylcysteine alpha-carbonyl methylesterase ICMEL1 OS=Oryza sativa subsp. japonica OX=39947 GN=IMCEL1 PE=2 SV=1 && PF20434:BD-FAE
gene_QJQ45_024772	-1.41715	0.0001193	KN5A_ORYSJ	KIN5A	hypothetical protein && sp|Q5W7C6|KN5A_ORYSJ Kinesin-like protein KIN-5A OS=Oryza sativa subsp. japonica OX=39947 GN=KIN5A PE=2 SV=1 && PF00225:Kinesin motor domain
gene_QJQ45_018627	-4.59379	0.000120329	CHLM_ARATH	CHLM	hypothetical protein && sp|Q9SW18|CHLM_ARATH Magnesium protoporphyrin IX methyltransferase, chloroplastic OS=Arabidopsis thaliana OX=3702 GN=CHLM PE=1 SV=1 && PF07109:Magnesium-protoporphyrin IX methyltransferase C-terminus
gene_QJQ45_026425	-1.09617	0.000123853	PPA27_ARATH	PAP27	hypothetical protein && sp|Q5MAU8|PPA27_ARATH Probable inactive purple acid phosphatase 27 OS=Arabidopsis thaliana OX=3702 GN=PAP27 PE=2 SV=1 && PF00149:Calcineurin-like phosphoesterase
novel.4736	2.43805	0.000135326	STR1_MEDTR	STR	- && sp|D3GE74|STR1_MEDTR ABC transporter G family member STR OS=Medicago truncatula OX=3880 GN=STR PE=1 SV=1 && -
gene_QJQ45_002947	1.0648	0.000137783	TF212_SCHPO	Tf2-12	hypothetical protein && sp|P0CT41|TF212_SCHPO Transposon Tf2-12 polyprotein OS=Schizosaccharomyces pombe (strain 972 / ATCC 24843) OX=284812 GN=Tf2-12 PE=3 SV=1 && PF17917:RNase H-like domain found in reverse transcriptase|PF00385:Chromo (CHRromatin Organisation MOdifier) domain|PF17921:Integrase zinc binding domain|PF00078:Reverse transcriptase (RNA-dependent DNA polymerase)
gene_QJQ45_009047	1.31633	0.000157674	Y9955_DICDI	DDB_G0267514	hypothetical protein && sp|Q55GU0|Y9955_DICDI Probable serine/threonine-protein kinase DDB_G0267514 OS=Dictyostelium discoideum OX=44689 GN=DDB_G0267514 PE=3 SV=1 && PF00069:Protein kinase domain
gene_QJQ45_028932	-1.3031	0.00016361	PPA17_ARATH	PAP17	hypothetical protein && sp|Q9SCX8|PPA17_ARATH Purple acid phosphatase 17 OS=Arabidopsis thaliana OX=3702 GN=PAP17 PE=2 SV=1 && PF00149:Calcineurin-like phosphoesterase
gene_QJQ45_004641	-1.449	0.000185224	DNM1B_ORYSJ	MET1B	hypothetical protein && sp|B1Q3J6|DNM1B_ORYSJ DNA (cytosine-5)-methyltransferase 1B OS=Oryza sativa subsp. japonica OX=39947 GN=MET1B PE=2 SV=1 && PF00145:C-5 cytosine-specific DNA methylase|PF12047:Cytosine specific DNA methyltransferase replication foci domain
novel.7388	1.1603	0.00020885	GLE_CHLRE	#N/A	- && sp|P31178|GLE_CHLRE Autolysin OS=Chlamydomonas reinhardtii OX=3055 PE=1 SV=1 && -
gene_QJQ45_003709	1.06025	0.000217848	DEGP1_ARATH	DEGP1	hypothetical protein && sp|O22609|DEGP1_ARATH Protease Do-like 1, chloroplastic OS=Arabidopsis thaliana OX=3702 GN=DEGP1 PE=1 SV=2 && PF13365:Trypsin-like peptidase domain|PF00078:Reverse transcriptase (RNA-dependent DNA polymerase)
gene_QJQ45_015209	1.66153	0.000226737	PHO4_NEUCR	pho-4	hypothetical protein && sp|P15710|PHO4_NEUCR Phosphate-repressible phosphate permease pho-4 OS=Neurospora crassa (strain ATCC 24698 / 74-OR23-1A / CBS 708.71 / DSM 1257 / FGSC 987) OX=367110 GN=pho-4 PE=1 SV=1 && PF01384:Phosphate transporter family
novel.3353	1.13378	0.000231327	HMGB9_ARATH	HMGB9	- && sp|Q9SGS2|HMGB9_ARATH High mobility group B protein 9 OS=Arabidopsis thaliana OX=3702 GN=HMGB9 PE=1 SV=1 && PF01388:ARID/BRIGHT DNA binding domain
gene_QJQ45_030031	-1.19647	0.000233872	KIF1_DICDI	kif1	hypothetical protein && sp|Q9NGQ2|KIF1_DICDI Kinesin-related protein 1 OS=Dictyostelium discoideum OX=44689 GN=kif1 PE=1 SV=1 && PF00225:Kinesin motor domain
gene_QJQ45_026335	-1.11937	0.000242325	PSAL_CUCSA	PSAL	hypothetical protein && sp|Q39654|PSAL_CUCSA Photosystem I reaction center subunit XI, chloroplastic OS=Cucumis sativus OX=3659 GN=PSAL PE=2 SV=1 && PF02605:Photosystem I reaction centre subunit XI
gene_QJQ45_002578	-1.75867	0.000267747	RB47A_ARATH	RBP47A	hypothetical protein && sp|F4I3B3|RB47A_ARATH Polyadenylate-binding protein RBP47A OS=Arabidopsis thaliana OX=3702 GN=RBP47A PE=2 SV=1 && PF00076:RNA recognition motif
gene_QJQ45_027147	1.78552	0.000272609	DEK1_ARATH	DEK1	hypothetical protein && sp|Q8RVL2|DEK1_ARATH Calpain-type cysteine protease DEK1 OS=Arabidopsis thaliana OX=3702 GN=DEK1 PE=1 SV=1 && PF00648:Calpain family cysteine protease
gene_QJQ45_008919	1.09521	0.00027678	H41_WHEAT	#N/A	hypothetical protein && sp|P62785|H41_WHEAT Histone H4 variant TH011 OS=Triticum aestivum OX=4565 PE=3 SV=2 && -
gene_QJQ45_016096	1.22063	0.00028154	DHDDS_HUMAN	DHDDS	hypothetical protein && sp|Q86SQ9|DHDDS_HUMAN Dehydrodolichyl diphosphate synthase complex subunit DHDDS OS=Homo sapiens OX=9606 GN=DHDDS PE=1 SV=3 && PF01255:Putative undecaprenyl diphosphate synthase
novel.4086	1.81077	0.000308347	MDV1_ASPTN	mdv1	- && sp|Q0CJD8|MDV1_ASPTN Mitochondrial division protein 1 OS=Aspergillus terreus (strain NIH 2624 / FGSC A1156) OX=341663 GN=mdv1 PE=3 SV=2 && -
gene_QJQ45_000752	1.0024	0.000309859	MA659_ARATH	#N/A	hypothetical protein && sp|Q4PSA3|MA659_ARATH 65-kDa microtubule-associated protein 9 OS=Arabidopsis thaliana OX=3702 GN=MAP65-9 PE=2 SV=1 && PF03999:Microtubule associated protein (MAP65/ASE1 family)
gene_QJQ45_021544	1.51792	0.000321315	PAN3_DICDI	#N/A	hypothetical protein && sp|P0CD65|PAN3_DICDI PAN2-PAN3 deadenylation complex subunit pan3 OS=Dictyostelium discoideum OX=44689 GN=pan3 PE=3 SV=1 && PF18101:Pan3 Pseudokinase domain
gene_QJQ45_003746	6.16639	0.00032344	YI31B_YEAST	TY3B-I	hypothetical protein && sp|Q7LHG5|YI31B_YEAST Transposon Ty3-I Gag-Pol polyprotein OS=Saccharomyces cerevisiae (strain ATCC 204508 / S288c) OX=559292 GN=TY3B-I PE=1 SV=2 && PF17921:Integrase zinc binding domain|PF00078:Reverse transcriptase (RNA-dependent DNA polymerase)|PF17917:RNase H-like domain found in reverse transcriptase|PF00385:Chromo (CHRromatin Organisation MOdifier) domain
gene_QJQ45_009518	-1.66695	0.000327927	DPOE1_ARATH	POL2A	hypothetical protein && sp|F4HW04|DPOE1_ARATH DNA polymerase epsilon catalytic subunit A OS=Arabidopsis thaliana OX=3702 GN=POL2A PE=1 SV=1 && PF08490:Domain of unknown function (DUF1744)|PF03104:DNA polymerase family B, exonuclease domain
gene_QJQ45_015722	1.81228	0.000328067	PLIP2_ARATH	PLIP2	hypothetical protein && sp|F4HXL0|PLIP2_ARATH Phospholipase A1 PLIP2, chloroplastic OS=Arabidopsis thaliana OX=3702 GN=PLIP2 PE=1 SV=1 && PF01764:Lipase (class 3)
gene_QJQ45_029803	-1.4203	0.000329562	STY17_ARATH	STY17	hypothetical protein && sp|Q8RWL6|STY17_ARATH Serine/threonine-protein kinase STY17 OS=Arabidopsis thaliana OX=3702 GN=STY17 PE=1 SV=1 && PF07714:Protein tyrosine and serine/threonine kinase
gene_QJQ45_011405	-1.0773	0.000341344	ARAK_ARATH	ARA1	hypothetical protein && sp|O23461|ARAK_ARATH L-arabinokinase OS=Arabidopsis thaliana OX=3702 GN=ARA1 PE=1 SV=1 && PF00288:GHMP kinases N terminal domain
gene_QJQ45_026849	2.95826	0.000345586	CATLL_FASHE	Cat-1	hypothetical protein && sp|Q24940|CATLL_FASHE Cathepsin L-like proteinase OS=Fasciola hepatica OX=6192 GN=Cat-1 PE=1 SV=1 && PF00112:Papain family cysteine protease
gene_QJQ45_018397	1.0584	0.000353721	ISN1_YARLI	ISN1	hypothetical protein && sp|Q6C673|ISN1_YARLI IMP-specific 5'-nucleotidase 1 OS=Yarrowia lipolytica (strain CLIB 122 / E 150) OX=284591 GN=ISN1 PE=3 SV=1 && PF06437:IMP-specific 5'-nucleotidase
novel.1436	-5.87798	0.000359739	SC4AA_TAKRU	scn4aa	- && sp|Q2XVR7|SC4AA_TAKRU Sodium channel protein type 4 subunit alpha A OS=Takifugu rubripes OX=31033 GN=scn4aa PE=3 SV=1 && PF00520:Ion transport protein
gene_QJQ45_000854	-1.15574	0.000386141	PAAS_ARATH	ELI5	hypothetical protein && sp|Q8RY79|PAAS_ARATH Phenylacetaldehyde synthase OS=Arabidopsis thaliana OX=3702 GN=ELI5 PE=1 SV=1 && PF00282:Pyridoxal-dependent decarboxylase conserved domain
novel.8025	-1.91991	0.000395051	PR1_ARATH	At2g14610	- && sp|P33154|PR1_ARATH Pathogenesis-related protein 1 OS=Arabidopsis thaliana OX=3702 GN=At2g14610 PE=1 SV=1 && -
gene_QJQ45_005572	-1.32	0.000397817	PT311_ARATH	At3g11320	hypothetical protein && sp|Q5XF09|PT311_ARATH Probable sugar phosphate/phosphate translocator At3g11320 OS=Arabidopsis thaliana OX=3702 GN=At3g11320 PE=2 SV=1 && -
novel.7096	1.42002	0.00039934	YUID_BACSU	yuiD	- && sp|O32107|YUID_BACSU Uncharacterized membrane protein YuiD OS=Bacillus subtilis (strain 168) OX=224308 GN=yuiD PE=4 SV=1 && -
gene_QJQ45_012036	1.31106	0.000402198	ZDH18_ARATH	PAT13	hypothetical protein && sp|Q94C49|ZDH18_ARATH Probable protein S-acyltransferase 13 OS=Arabidopsis thaliana OX=3702 GN=PAT13 PE=2 SV=1 && PF01529:DHHC palmitoyltransferase
gene_QJQ45_024899	1.02432	0.000409984	MCFX_DICDI	mcfX	hypothetical protein && sp|Q86AV5|MCFX_DICDI Mitochondrial substrate carrier family protein X OS=Dictyostelium discoideum OX=44689 GN=mcfX PE=3 SV=1 && PF00153:Mitochondrial carrier protein
novel.2650	1.29155	0.000421465	DIV_ANTMA	#N/A	- && sp|Q8S9H7|DIV_ANTMA Transcription factor DIVARICATA OS=Antirrhinum majus OX=4151 GN=DIVARICATA PE=2 SV=1 && -
gene_QJQ45_016810	1.58004	0.000427074	TCX2_ARATH	TCX2	hypothetical protein && sp|F4JIF5|TCX2_ARATH Protein tesmin/TSO1-like CXC 2 OS=Arabidopsis thaliana OX=3702 GN=TCX2 PE=1 SV=1 && PF03638:Tesmin/TSO1-like CXC domain, cysteine-rich domain
gene_QJQ45_009417	-1.13993	0.000428177	DIT2_SPIOL	DIT2	hypothetical protein && sp|Q8L7Z9|DIT2_SPIOL Dicarboxylate transporter 2, chloroplastic OS=Spinacia oleracea OX=3562 GN=DIT2 PE=1 SV=1 && PF00939:Sodium:sulfate symporter transmembrane region
gene_QJQ45_014070	1.1381	0.000433788	SRS10_HUMAN	SRSF10	hypothetical protein && sp|O75494|SRS10_HUMAN Serine/arginine-rich splicing factor 10 OS=Homo sapiens OX=9606 GN=SRSF10 PE=1 SV=1 && PF00076:RNA recognition motif
gene_QJQ45_014403	-2.08649	0.000450393	POL3_DROME	pol	hypothetical protein && sp|P04323|POL3_DROME Retrovirus-related Pol polyprotein from transposon 17.6 OS=Drosophila melanogaster OX=7227 GN=pol PE=4 SV=1 && PF00078:Reverse transcriptase (RNA-dependent DNA polymerase)|PF17917:RNase H-like domain found in reverse transcriptase
novel.5797	-1.43358	0.000457932	F135A_PONAB	FAM135A	- && sp|Q5RA75|F135A_PONAB Protein FAM135A OS=Pongo abelii OX=9601 GN=FAM135A PE=2 SV=1 && -
gene_QJQ45_017309	5.98802	0.000480231	YG31B_YEAST	TY3B-G	hypothetical protein && sp|Q99315|YG31B_YEAST Transposon Ty3-G Gag-Pol polyprotein OS=Saccharomyces cerevisiae (strain ATCC 204508 / S288c) OX=559292 GN=TY3B-G PE=1 SV=3 && PF17917:RNase H-like domain found in reverse transcriptase|PF00078:Reverse transcriptase (RNA-dependent DNA polymerase)|PF00385:Chromo (CHRromatin Organisation MOdifier) domain|PF17921:Integrase zinc binding domain|PF19259:Ty3…
gene_QJQ45_019138	-1.11136	0.00049964	N4BP2_HUMAN	N4BP2	hypothetical protein && sp|Q86UW6|N4BP2_HUMAN NEDD4-binding protein 2 OS=Homo sapiens OX=9606 GN=N4BP2 PE=1 SV=2 && PF08590:Domain of unknown function (DUF1771)
gene_QJQ45_013950	1.09032	0.000510977	CYSE_SALTY	cysE	hypothetical protein && sp|P29847|CYSE_SALTY Serine acetyltransferase OS=Salmonella typhimurium (strain LT2 / SGSC1412 / ATCC 700720) OX=99287 GN=cysE PE=1 SV=1 && PF06140:Interferon-induced 6-16 family
gene_QJQ45_017369	-1.06808	0.000563217	CYP23_ARATH	CYP23	hypothetical protein && sp|Q8LDR3|CYP23_ARATH Peptidyl-prolyl cis-trans isomerase CYP23 OS=Arabidopsis thaliana OX=3702 GN=CYP23 PE=2 SV=1 && PF00160:Cyclophilin type peptidyl-prolyl cis-trans isomerase/CLD
gene_QJQ45_000344	-1.02395	0.000569878	RENT1_DICDI	upf1	hypothetical protein && sp|Q54I89|RENT1_DICDI Regulator of nonsense transcripts 1 OS=Dictyostelium discoideum OX=44689 GN=upf1 PE=3 SV=1 && PF13086:AAA domain|PF13087:AAA domain
gene_QJQ45_005526	5.86803	0.000573131	POL3_DROME	pol	hypothetical protein && sp|P04323|POL3_DROME Retrovirus-related Pol polyprotein from transposon 17.6 OS=Drosophila melanogaster OX=7227 GN=pol PE=4 SV=1 && PF17917:RNase H-like domain found in reverse transcriptase|PF00078:Reverse transcriptase (RNA-dependent DNA polymerase)|PF00385:Chromo (CHRromatin Organisation MOdifier) domain|PF17921:Integrase zinc binding domain
gene_QJQ45_023377	-2.53611	0.00057996	KN7I_ORYSJ	KIN7I	hypothetical protein && sp|B9G3M6|KN7I_ORYSJ Kinesin-like protein KIN-7I OS=Oryza sativa subsp. japonica OX=39947 GN=KIN7I PE=2 SV=2 && PF00225:Kinesin motor domain
gene_QJQ45_007200	2.60296	0.000581523	POLX_TOBAC	#N/A	hypothetical protein && sp|P10978|POLX_TOBAC Retrovirus-related Pol polyprotein from transposon TNT 1-94 OS=Nicotiana tabacum OX=4097 PE=2 SV=1 && PF07727:Reverse transcriptase (RNA-dependent DNA polymerase)
gene_QJQ45_015546	1.14418	0.000682482	YI31B_YEAST	TY3B-I	hypothetical protein && sp|Q7LHG5|YI31B_YEAST Transposon Ty3-I Gag-Pol polyprotein OS=Saccharomyces cerevisiae (strain ATCC 204508 / S288c) OX=559292 GN=TY3B-I PE=1 SV=2 && PF17919:RNase H-like domain found in reverse transcriptase|PF00385:Chromo (CHRromatin Organisation MOdifier) domain|PF00078:Reverse transcriptase (RNA-dependent DNA polymerase)|PF17921:Integrase zinc binding domain
novel.4212	1.76776	0.000686876	AP24_ORYSI	AP2-4	- && sp|B8B0I8|AP24_ORYSI APETALA2-like protein 4 OS=Oryza sativa subsp. indica OX=39946 GN=AP2-4 PE=3 SV=1 && -
novel.992	1.06425	0.000697815	DUR3_ARATH	DUR3	- && sp|F4KD71|DUR3_ARATH Urea-proton symporter DUR3 OS=Arabidopsis thaliana OX=3702 GN=DUR3 PE=1 SV=1 && -
gene_QJQ45_020104	1.96586	0.000711017	POLX_TOBAC	#N/A	hypothetical protein && sp|P10978|POLX_TOBAC Retrovirus-related Pol polyprotein from transposon TNT 1-94 OS=Nicotiana tabacum OX=4097 PE=2 SV=1 && PF13976:GAG-pre-integrase domain|PF00665:Integrase core domain|PF14223:gag-polypeptide of LTR copia-type|PF07727:Reverse transcriptase (RNA-dependent DNA polymerase)
novel.6026	-1.32962	0.000726811	SEPR_THESR	#N/A	- && sp|P80146|SEPR_THESR Extracellular serine proteinase OS=Thermus sp. (strain Rt41A) OX=32063 PE=1 SV=3 && PF00082:Subtilase family
novel.4743	-1.05607	0.000728486	PKS12_MYCTU	pks12	- && sp|I6XD69|PKS12_MYCTU Mycoketide-CoA synthase OS=Mycobacterium tuberculosis (strain ATCC 25618 / H37Rv) OX=83332 GN=pks12 PE=1 SV=1 && -
gene_QJQ45_028600	-1.13131	0.000787591	DYL4_CHLRE	#N/A	hypothetical protein && sp|Q39591|DYL4_CHLRE Dynein 14 kDa light chain, flagellar outer arm OS=Chlamydomonas reinhardtii OX=3055 PE=1 SV=1 && -
novel.2663	-1.21306	0.000811871	TBE_HUMAN	TUBE1	- && sp|Q9UJT0|TBE_HUMAN Tubulin epsilon chain OS=Homo sapiens OX=9606 GN=TUBE1 PE=2 SV=1 && PF00091:Tubulin/FtsZ family, GTPase domain
gene_QJQ45_011487	1.77159	0.000873555	PLIP1_ARATH	PLIP1	hypothetical protein && sp|Q7Y220|PLIP1_ARATH Phospholipase A1 PLIP1, chloroplastic OS=Arabidopsis thaliana OX=3702 GN=PLIP1 PE=1 SV=1 && PF01764:Lipase (class 3)
gene_QJQ45_017581	1.65569	0.000961283	SRK2J_ARATH	SRK2J	hypothetical protein && sp|O64812|SRK2J_ARATH Serine/threonine-protein kinase SRK2J OS=Arabidopsis thaliana OX=3702 GN=SRK2J PE=1 SV=1 && PF00069:Protein kinase domain
gene_QJQ45_030271	5.69974	0.000970006	POL3_DROME	pol	hypothetical protein && sp|P04323|POL3_DROME Retrovirus-related Pol polyprotein from transposon 17.6 OS=Drosophila melanogaster OX=7227 GN=pol PE=4 SV=1 && PF17917:RNase H-like domain found in reverse transcriptase|PF00078:Reverse transcriptase (RNA-dependent DNA polymerase)|PF17921:Integrase zinc binding domain
gene_QJQ45_002086	2.12973	0.000984814	H32_BOVIN	#N/A	hypothetical protein && sp|P84227|H32_BOVIN Histone H3.2 OS=Bos taurus OX=9913 PE=1 SV=2 && PF00125:Core histone H2A/H2B/H3/H4
gene_QJQ45_019905	1.37467	0.00104018	CAPTC_DICDI	captC	hypothetical protein && sp|Q550W1|CAPTC_DICDI Uncharacterized CDP-alcohol phosphatidyltransferase class-I family protein 3 OS=Dictyostelium discoideum OX=44689 GN=captC PE=2 SV=1 && PF01066:CDP-alcohol phosphatidyltransferase
gene_QJQ45_009761	-2.90509	0.00104755	CBX5_MOUSE	Cbx5	hypothetical protein && sp|Q61686|CBX5_MOUSE Chromobox protein homolog 5 OS=Mus musculus OX=10090 GN=Cbx5 PE=1 SV=1 && PF00385:Chromo (CHRromatin Organisation MOdifier) domain|PF17921:Integrase zinc binding domain
gene_QJQ45_005076	1.6572	0.00106557	ISS1_ARATH	ISS1	hypothetical protein && sp|Q9C969|ISS1_ARATH Aromatic aminotransferase ISS1 OS=Arabidopsis thaliana OX=3702 GN=ISS1 PE=1 SV=1 && PF00155:Aminotransferase class I and II
gene_QJQ45_022598	1.74164	0.00107189	YG31B_YEAST	TY3B-G	hypothetical protein && sp|Q99315|YG31B_YEAST Transposon Ty3-G Gag-Pol polyprotein OS=Saccharomyces cerevisiae (strain ATCC 204508 / S288c) OX=559292 GN=TY3B-G PE=1 SV=3 && PF17921:Integrase zinc binding domain|PF00385:Chromo (CHRromatin Organisation MOdifier) domain|PF17917:RNase H-like domain found in reverse transcriptase|PF00665:Integrase core domain|PF00078:Reverse transcriptase (RNA-depende…
gene_QJQ45_016038	2.40231	0.00107449	PPA15_ARATH	PAP15	hypothetical protein && sp|Q9SFU3|PPA15_ARATH Purple acid phosphatase 15 OS=Arabidopsis thaliana OX=3702 GN=PAP15 PE=1 SV=1 && PF00149:Calcineurin-like phosphoesterase
gene_QJQ45_022369	2.49971	0.00113398	AURKA_BOVIN	AURKA	hypothetical protein && sp|Q2TA06|AURKA_BOVIN Aurora kinase A OS=Bos taurus OX=9913 GN=AURKA PE=2 SV=1 && PF00069:Protein kinase domain
novel.2523	-1.02855	0.00117481	ZD16A_DANRE	zdhhc16a	- && sp|B8A4F0|ZD16A_DANRE Palmitoyltransferase ZDHHC16A OS=Danio rerio OX=7955 GN=zdhhc16a PE=2 SV=1 && PF01529:DHHC palmitoyltransferase
novel.8754	4.56357	0.00120893	TAUE1_ARATH	At1g11540	- && sp|F4I8X6|TAUE1_ARATH Sulfite exporter TauE/SafE family protein 1 OS=Arabidopsis thaliana OX=3702 GN=At1g11540 PE=2 SV=2 && PF01925:Sulfite exporter TauE/SafE
gene_QJQ45_014069	2.04944	0.00125691	YI31B_YEAST	TY3B-I	hypothetical protein && sp|Q7LHG5|YI31B_YEAST Transposon Ty3-I Gag-Pol polyprotein OS=Saccharomyces cerevisiae (strain ATCC 204508 / S288c) OX=559292 GN=TY3B-I PE=1 SV=2 && PF00078:Reverse transcriptase (RNA-dependent DNA polymerase)|PF17921:Integrase zinc binding domain|PF00665:Integrase core domain|PF00385:Chromo (CHRromatin Organisation MOdifier) domain|PF17917:RNase H-like domain found in rev…
novel.4749	-1.92953	0.00125789	ERYA2_SACER	eryA	- && sp|Q03132|ERYA2_SACER 6-deoxyerythronolide-B synthase EryA2, modules 3 and 4 OS=Saccharopolyspora erythraea OX=1836 GN=eryA PE=1 SV=3 && -
gene_QJQ45_025392	1.01597	0.00128841	DED1_VANPO	DED1	hypothetical protein && sp|A7TKR8|DED1_VANPO ATP-dependent RNA helicase DED1 OS=Vanderwaltozyma polyspora (strain ATCC 22028 / DSM 70294 / BCRC 21397 / CBS 2163 / NBRC 10782 / NRRL Y-8283 / UCD 57-17) OX=436907 GN=DED1 PE=3 SV=1 && PF00271:Helicase conserved C-terminal domain
gene_QJQ45_027178	1.17332	0.00130633	S20A2_XENTR	slc20a2	hypothetical protein && sp|Q28E01|S20A2_XENTR Sodium-dependent phosphate transporter 2 OS=Xenopus tropicalis OX=8364 GN=slc20a2 PE=2 SV=1 && PF01384:Phosphate transporter family
gene_QJQ45_012629	-1.8175	0.00132293	BAS1_HORVU	BAS1	hypothetical protein && sp|Q96468|BAS1_HORVU 2-Cys peroxiredoxin BAS1, chloroplastic (Fragment) OS=Hordeum vulgare OX=4513 GN=BAS1 PE=2 SV=1 && -
gene_QJQ45_014482	5.7373	0.0013289	POLX_TOBAC	#N/A	hypothetical protein && sp|P10978|POLX_TOBAC Retrovirus-related Pol polyprotein from transposon TNT 1-94 OS=Nicotiana tabacum OX=4097 PE=2 SV=1 && PF07727:Reverse transcriptase (RNA-dependent DNA polymerase)|PF13976:GAG-pre-integrase domain|PF00665:Integrase core domain
gene_QJQ45_007401	5.6406	0.00135412	YG31B_YEAST	TY3B-G	hypothetical protein && sp|Q99315|YG31B_YEAST Transposon Ty3-G Gag-Pol polyprotein OS=Saccharomyces cerevisiae (strain ATCC 204508 / S288c) OX=559292 GN=TY3B-G PE=1 SV=3 && PF19259:Ty3 transposon capsid-like protein|PF17919:RNase H-like domain found in reverse transcriptase|PF00078:Reverse transcriptase (RNA-dependent DNA polymerase)
gene_QJQ45_021546	-1.468	0.00136156	DNM1B_ORYSJ	MET1B	hypothetical protein && sp|B1Q3J6|DNM1B_ORYSJ DNA (cytosine-5)-methyltransferase 1B OS=Oryza sativa subsp. japonica OX=39947 GN=MET1B PE=2 SV=1 && PF12047:Cytosine specific DNA methyltransferase replication foci domain
gene_QJQ45_001071	1.96219	0.00138272	EDR1_ARATH	EDR1	hypothetical protein && sp|Q9FPR3|EDR1_ARATH Serine/threonine-protein kinase EDR1 OS=Arabidopsis thaliana OX=3702 GN=EDR1 PE=1 SV=1 && PF07714:Protein tyrosine and serine/threonine kinase
gene_QJQ45_005443	-1.5915	0.00140216	POL5_DROME	pol	hypothetical protein && sp|Q8I7P9|POL5_DROME Retrovirus-related Pol polyprotein from transposon opus OS=Drosophila melanogaster OX=7227 GN=pol PE=4 SV=1 && PF17917:RNase H-like domain found in reverse transcriptase|PF00078:Reverse transcriptase (RNA-dependent DNA polymerase)
gene_QJQ45_009594	1.04681	0.00147125	PRP31_ARATH	PRP31	hypothetical protein && sp|Q8RXN6|PRP31_ARATH U4/U6 small nuclear ribonucleoprotein Prp31 homolog OS=Arabidopsis thaliana OX=3702 GN=PRP31 PE=1 SV=1 && PF09785:Prp31 C terminal domain|PF01798:snoRNA binding domain, fibrillarin
gene_QJQ45_006652	1.57423	0.00154522	YRD6_CAEEL	K02A2.6	hypothetical protein && sp|Q09575|YRD6_CAEEL Uncharacterized protein K02A2.6 OS=Caenorhabditis elegans OX=6239 GN=K02A2.6 PE=4 SV=1 && PF17921:Integrase zinc binding domain|PF00385:Chromo (CHRromatin Organisation MOdifier) domain
gene_QJQ45_016998	1.05983	0.00155622	THP3_YEAST	THP3	hypothetical protein && sp|Q12049|THP3_YEAST Protein THP3 OS=Saccharomyces cerevisiae (strain ATCC 204508 / S288c) OX=559292 GN=THP3 PE=1 SV=1 && -
gene_QJQ45_008004	3.59069	0.00161112	COPIA_DROME	GIP	hypothetical protein && sp|P04146|COPIA_DROME Copia protein OS=Drosophila melanogaster OX=7227 GN=GIP PE=1 SV=3 && PF14223:gag-polypeptide of LTR copia-type|PF13976:GAG-pre-integrase domain|PF00665:Integrase core domain
novel.2718	5.5953	0.00163072	TRE_ORYSJ	#N/A	- && sp|Q9FWC1|TRE_ORYSJ Probable trehalase OS=Oryza sativa subsp. japonica OX=39947 GN=Os10g0521000 PE=2 SV=1 && PF01204:Trehalase
gene_QJQ45_001287	1.17985	0.00166443	DTX45_ARATH	DTX45	hypothetical protein && sp|Q9SVE7|DTX45_ARATH Protein DETOXIFICATION 45, chloroplastic OS=Arabidopsis thaliana OX=3702 GN=DTX45 PE=2 SV=2 && PF01554:MatE
gene_QJQ45_028742	2.55417	0.00170435	POLX_TOBAC	#N/A	hypothetical protein && sp|P10978|POLX_TOBAC Retrovirus-related Pol polyprotein from transposon TNT 1-94 OS=Nicotiana tabacum OX=4097 PE=2 SV=1 && PF14223:gag-polypeptide of LTR copia-type|PF00665:Integrase core domain|PF13976:GAG-pre-integrase domain
gene_QJQ45_030432	1.57231	0.00172778	YI31B_YEAST	TY3B-I	hypothetical protein && sp|Q7LHG5|YI31B_YEAST Transposon Ty3-I Gag-Pol polyprotein OS=Saccharomyces cerevisiae (strain ATCC 204508 / S288c) OX=559292 GN=TY3B-I PE=1 SV=2 && PF00385:Chromo (CHRromatin Organisation MOdifier) domain|PF00078:Reverse transcriptase (RNA-dependent DNA polymerase)|PF00665:Integrase core domain|PF17921:Integrase zinc binding domain|PF17917:RNase H-like domain found in rev…
gene_QJQ45_021530	1.15599	0.00173231	CCF31_ORYSJ	#N/A	hypothetical protein && sp|Q10Q63|CCF31_ORYSJ Putative cyclin-F3-1 OS=Oryza sativa subsp. japonica OX=39947 GN=CYCF3-1 PE=3 SV=1 && PF00134:Cyclin, N-terminal domain
gene_QJQ45_009908	-1.55653	0.00174982	POL5_DROME	pol	hypothetical protein && sp|Q8I7P9|POL5_DROME Retrovirus-related Pol polyprotein from transposon opus OS=Drosophila melanogaster OX=7227 GN=pol PE=4 SV=1 && PF00078:Reverse transcriptase (RNA-dependent DNA polymerase)|PF17921:Integrase zinc binding domain|PF17917:RNase H-like domain found in reverse transcriptase|PF00628:PHD-finger
gene_QJQ45_018007	-1.94799	0.00177692	TF212_SCHPO	Tf2-12	hypothetical protein && sp|P0CT41|TF212_SCHPO Transposon Tf2-12 polyprotein OS=Schizosaccharomyces pombe (strain 972 / ATCC 24843) OX=284812 GN=Tf2-12 PE=3 SV=1 && PF17921:Integrase zinc binding domain|PF17917:RNase H-like domain found in reverse transcriptase|PF00078:Reverse transcriptase (RNA-dependent DNA polymerase)
gene_QJQ45_008466	-1.43688	0.00177734	POLX_TOBAC	#N/A	hypothetical protein && sp|P10978|POLX_TOBAC Retrovirus-related Pol polyprotein from transposon TNT 1-94 OS=Nicotiana tabacum OX=4097 PE=2 SV=1 && PF00665:Integrase core domain|PF14223:gag-polypeptide of LTR copia-type|PF07727:Reverse transcriptase (RNA-dependent DNA polymerase)|PF13976:GAG-pre-integrase domain
gene_QJQ45_018719	1.11747	0.00188166	CTDS_DICDI	fcpA	hypothetical protein && sp|Q9XYL0|CTDS_DICDI Probable C-terminal domain small phosphatase OS=Dictyostelium discoideum OX=44689 GN=fcpA PE=3 SV=1 && PF03031:NLI interacting factor-like phosphatase
gene_QJQ45_013635	1.33888	0.00190319	POLX_TOBAC	#N/A	hypothetical protein && sp|P10978|POLX_TOBAC Retrovirus-related Pol polyprotein from transposon TNT 1-94 OS=Nicotiana tabacum OX=4097 PE=2 SV=1 && PF00665:Integrase core domain|PF07727:Reverse transcriptase (RNA-dependent DNA polymerase)|PF14223:gag-polypeptide of LTR copia-type|PF13976:GAG-pre-integrase domain
novel.2547	1.43049	0.00192765	ANM1_CHLRE	PRMT1	- && sp|A8IEF3|ANM1_CHLRE Protein arginine N-methyltransferase 1 OS=Chlamydomonas reinhardtii OX=3055 GN=PRMT1 PE=1 SV=1 && -
gene_QJQ45_028010	1.30027	0.00199	RKD3_ARATH	RKD3	hypothetical protein && sp|Q9FGD1|RKD3_ARATH Protein RKD3 OS=Arabidopsis thaliana OX=3702 GN=RKD3 PE=3 SV=1 && PF02042:RWP-RK domain
gene_QJQ45_006938	2.34152	0.00211811	H41_WHEAT	#N/A	hypothetical protein && sp|P62785|H41_WHEAT Histone H4 variant TH011 OS=Triticum aestivum OX=4565 PE=3 SV=2 && -
gene_QJQ45_028007	-1.25178	0.00215513	APY3_ORYSJ	APY3	hypothetical protein && sp|Q2QYE1|APY3_ORYSJ Probable apyrase 3 OS=Oryza sativa subsp. japonica OX=39947 GN=APY3 PE=2 SV=2 && PF01150:GDA1/CD39 (nucleoside phosphatase) family
gene_QJQ45_011821	2.6766	0.00217051	POLX_TOBAC	#N/A	hypothetical protein && sp|P10978|POLX_TOBAC Retrovirus-related Pol polyprotein from transposon TNT 1-94 OS=Nicotiana tabacum OX=4097 PE=2 SV=1 && PF13976:GAG-pre-integrase domain|PF07727:Reverse transcriptase (RNA-dependent DNA polymerase)|PF00665:Integrase core domain
novel.3900	-2.69278	0.00217622	ORC4_ORYSJ	ORC4	- && sp|Q5N8Q4|ORC4_ORYSJ Origin of replication complex subunit 4 OS=Oryza sativa subsp. japonica OX=39947 GN=ORC4 PE=2 SV=1 && -
gene_QJQ45_019969	1.19044	0.00219784	CHPT1_BOVIN	CHPT1	hypothetical protein && sp|Q1LZE6|CHPT1_BOVIN Cholinephosphotransferase 1 OS=Bos taurus OX=9913 GN=CHPT1 PE=2 SV=1 && -
novel.4616	-1.34413	0.00222183	PREU3_PREIS	#N/A	- && sp|P9WET6|PREU3_PREIS Non-reducing polyketide synthase Preu3 OS=Preussia isomera OX=325670 GN=Preu3 PE=1 SV=1 && -
novel.2646	1.28543	0.00223711	KISHA_DANRE	tmem167a	- && sp|Q5BJC2|KISHA_DANRE Protein kish-A OS=Danio rerio OX=7955 GN=tmem167a PE=3 SV=1 && -
gene_QJQ45_025956	1.56695	0.00224346	TEKT_CHLRE	CHLREDRAFT_24358	hypothetical protein && sp|A8J8F6|TEKT_CHLRE Tektin OS=Chlamydomonas reinhardtii OX=3055 GN=CHLREDRAFT_24358 PE=1 SV=1 && PF03148:Tektin family
novel.778	-1.97335	0.00229115	WTR16_ARATH	At3g02690	- && sp|Q93V85|WTR16_ARATH WAT1-related protein At3g02690, chloroplastic OS=Arabidopsis thaliana OX=3702 GN=At3g02690 PE=1 SV=1 && PF00892:EamA-like transporter family
novel.2367	-1.34856	0.00229359	AP21_ORYSI	AP2-1	- && sp|B8AXC3|AP21_ORYSI APETALA2-like protein 1 OS=Oryza sativa subsp. indica OX=39946 GN=AP2-1 PE=2 SV=2 && -
gene_QJQ45_029440	2.16509	0.00230178	GUN11_ORYSJ	GLU4	hypothetical protein && sp|Q7XTH4|GUN11_ORYSJ Endoglucanase 11 OS=Oryza sativa subsp. japonica OX=39947 GN=GLU4 PE=2 SV=3 && PF00759:Glycosyl hydrolase family 9
gene_QJQ45_006357	-5.5155	0.00231526	POLX_TOBAC	#N/A	hypothetical protein && sp|P10978|POLX_TOBAC Retrovirus-related Pol polyprotein from transposon TNT 1-94 OS=Nicotiana tabacum OX=4097 PE=2 SV=1 && -
gene_QJQ45_002803	-1.6207	0.00235673	TF212_SCHPO	Tf2-12	hypothetical protein && sp|P0CT41|TF212_SCHPO Transposon Tf2-12 polyprotein OS=Schizosaccharomyces pombe (strain 972 / ATCC 24843) OX=284812 GN=Tf2-12 PE=3 SV=1 && PF00385:Chromo (CHRromatin Organisation MOdifier) domain|PF00078:Reverse transcriptase (RNA-dependent DNA polymerase)|PF17917:RNase H-like domain found in reverse transcriptase|PF17921:Integrase zinc binding domain
gene_QJQ45_022489	1.18946	0.00238314	CFA52_CHLRE	CFAP52	hypothetical protein && sp|A8ILK1|CFA52_CHLRE Cilia- and flagella-associated protein 52 OS=Chlamydomonas reinhardtii OX=3055 GN=CFAP52 PE=1 SV=1 && -
gene_QJQ45_017246	1.42378	0.00244532	STY8_ARATH	STY8	hypothetical protein && sp|O22558|STY8_ARATH Serine/threonine-protein kinase STY8 OS=Arabidopsis thaliana OX=3702 GN=STY8 PE=1 SV=2 && PF07714:Protein tyrosine and serine/threonine kinase
gene_QJQ45_024752	1.57482	0.00245182	SKOR_ARATH	SKOR	hypothetical protein && sp|Q9M8S6|SKOR_ARATH Potassium channel SKOR OS=Arabidopsis thaliana OX=3702 GN=SKOR PE=1 SV=1 && PF00520:Ion transport protein
gene_QJQ45_020713	-1.26466	0.00245522	RPD6A_ARATH	NRPB6A	hypothetical protein && sp|Q9FJ98|RPD6A_ARATH DNA-directed RNA polymerases II, IV and V subunit 6A OS=Arabidopsis thaliana OX=3702 GN=NRPB6A PE=1 SV=1 && PF01192:RNA polymerase Rpb6
gene_QJQ45_011780	1.59022	0.00255957	POLX_TOBAC	#N/A	hypothetical protein && sp|P10978|POLX_TOBAC Retrovirus-related Pol polyprotein from transposon TNT 1-94 OS=Nicotiana tabacum OX=4097 PE=2 SV=1 && PF00962:Adenosine deaminase|PF00665:Integrase core domain|PF07727:Reverse transcriptase (RNA-dependent DNA polymerase)|PF14223:gag-polypeptide of LTR copia-type
gene_QJQ45_030415	5.04115	0.00256665	CCS1_CHLRE	CCS1	hypothetical protein && sp|Q8GTZ9|CCS1_CHLRE Cytochrome c biogenesis protein CCS1, chloroplastic OS=Chlamydomonas reinhardtii OX=3055 GN=CCS1 PE=1 SV=2 && PF05140:ResB-like family
gene_QJQ45_023005	1.21096	0.00257499	PDE4C_RAT	Pde4c	hypothetical protein && sp|P14644|PDE4C_RAT cAMP-specific 3',5'-cyclic phosphodiesterase 4C (Fragment) OS=Rattus norvegicus OX=10116 GN=Pde4c PE=2 SV=2 && PF00233:3'5'-cyclic nucleotide phosphodiesterase
gene_QJQ45_026524	-1.37875	0.00268145	Y3148_ARATH	LRR-RLK	hypothetical protein && sp|C0LGN2|Y3148_ARATH Probable leucine-rich repeat receptor-like serine/threonine-protein kinase At3g14840 OS=Arabidopsis thaliana OX=3702 GN=LRR-RLK PE=1 SV=1 && PF00069:Protein kinase domain|PF00075:RNase H
gene_QJQ45_014637	1.46074	0.00292466	YG31B_YEAST	TY3B-G	hypothetical protein && sp|Q99315|YG31B_YEAST Transposon Ty3-G Gag-Pol polyprotein OS=Saccharomyces cerevisiae (strain ATCC 204508 / S288c) OX=559292 GN=TY3B-G PE=1 SV=3 && PF00385:Chromo (CHRromatin Organisation MOdifier) domain|PF00665:Integrase core domain|PF17921:Integrase zinc binding domain|PF17919:RNase H-like domain found in reverse transcriptase|PF17917:RNase H-like domain found in rever…
gene_QJQ45_000059	5.43228	0.0030501	H2A_CHLRE	H2A-II	hypothetical protein && sp|P50567|H2A_CHLRE Histone H2A OS=Chlamydomonas reinhardtii OX=3055 GN=H2A-II PE=3 SV=1 && PF16211:C-terminus of histone H2A|PF00125:Core histone H2A/H2B/H3/H4
gene_QJQ45_018137	3.05101	0.00311428	POLR_DROME	pol	hypothetical protein && sp|P16423|POLR_DROME Retrovirus-related Pol polyprotein from type-2 retrotransposable element R2DM OS=Drosophila melanogaster OX=7227 GN=pol PE=4 SV=1 && PF00075:RNase H|PF00078:Reverse transcriptase (RNA-dependent DNA polymerase)|PF03372:Endonuclease/Exonuclease/phosphatase family
gene_QJQ45_008651	-1.13906	0.00316108	PDE4_CAEEL	pde-4	hypothetical protein && sp|Q22000|PDE4_CAEEL Probable 3',5'-cyclic phosphodiesterase pde-4 OS=Caenorhabditis elegans OX=6239 GN=pde-4 PE=2 SV=2 && PF00233:3'5'-cyclic nucleotide phosphodiesterase
gene_QJQ45_027700	1.76383	0.00317731	RGLG4_ARATH	RGLG4	hypothetical protein && sp|Q9SAL0|RGLG4_ARATH E3 ubiquitin-protein ligase RGLG4 OS=Arabidopsis thaliana OX=3702 GN=RGLG4 PE=1 SV=1 && PF07002:Copine
novel.2453	5.46564	0.00318159	RAD54_ORYSJ	RAD54	- && sp|A4PBL4|RAD54_ORYSJ DNA repair and recombination protein RAD54 OS=Oryza sativa subsp. japonica OX=39947 GN=RAD54 PE=1 SV=1 && -
gene_QJQ45_018937	-1.05017	0.00320119	CNOT1_XENTR	cnot1	hypothetical protein && sp|A0JP85|CNOT1_XENTR CCR4-NOT transcription complex subunit 1 OS=Xenopus tropicalis OX=8364 GN=cnot1 PE=2 SV=1 && PF16415:CCR4-NOT transcription complex subunit 1 CAF1-binding domain|PF12842:CCR4-Not complex, Not1 subunit, domain of unknown function DUF3819
gene_QJQ45_016342	1.19002	0.00320817	ODA1_CHLRE	ODA1	hypothetical protein && sp|A8JF70|ODA1_CHLRE Outer dynein arm protein 1 OS=Chlamydomonas reinhardtii OX=3055 GN=ODA1 PE=1 SV=1 && PF21773:Domain of unknown function (DUF6872)
gene_QJQ45_026945	1.39422	0.00321079	Y1972_ARATH	#N/A	hypothetical protein && sp|Q9ASQ6|Y1972_ARATH Probable LRR receptor-like serine/threonine-protein kinase At1g29720 OS=Arabidopsis thaliana OX=3702 GN=RFK1 PE=2 SV=3 && PF00069:Protein kinase domain
gene_QJQ45_004376	-1.01968	0.00325367	SYGM1_ARATH	At1g29880	hypothetical protein && sp|O23627|SYGM1_ARATH Glycine--tRNA ligase, mitochondrial 1 OS=Arabidopsis thaliana OX=3702 GN=At1g29880 PE=1 SV=1 && PF00587:tRNA synthetase class II core domain (G, H, P, S and T)|PF03129:Anticodon binding domain
novel.711	-1.43437	0.00326525	HEN2_ARATH	HEN2	- && sp|Q9ZVW2|HEN2_ARATH DExH-box ATP-dependent RNA helicase DExH10 OS=Arabidopsis thaliana OX=3702 GN=HEN2 PE=1 SV=2 && -
gene_QJQ45_016347	1.23884	0.00341639	RFS_ORYSJ	RFS	hypothetical protein && sp|Q5VQG4|RFS_ORYSJ Galactinol--sucrose galactosyltransferase OS=Oryza sativa subsp. japonica OX=39947 GN=RFS PE=1 SV=1 && PF05691:Raffinose synthase or seed imbibition protein Sip1
gene_QJQ45_000859	-2.19401	0.00343092	GCYB2_RAT	Gucy1b2	hypothetical protein && sp|P22717|GCYB2_RAT Guanylate cyclase soluble subunit beta-2 OS=Rattus norvegicus OX=10116 GN=Gucy1b2 PE=2 SV=1 && PF00211:Adenylate and Guanylate cyclase catalytic domain
gene_QJQ45_023238	-1.13775	0.00354425	IP5PF_ARATH	IP5P15	hypothetical protein && sp|Q84W55|IP5PF_ARATH Type II inositol polyphosphate 5-phosphatase 15 OS=Arabidopsis thaliana OX=3702 GN=IP5P15 PE=1 SV=2 && -
gene_QJQ45_011559	1.92141	0.00354817	YG31B_YEAST	TY3B-G	hypothetical protein && sp|Q99315|YG31B_YEAST Transposon Ty3-G Gag-Pol polyprotein OS=Saccharomyces cerevisiae (strain ATCC 204508 / S288c) OX=559292 GN=TY3B-G PE=1 SV=3 && PF00385:Chromo (CHRromatin Organisation MOdifier) domain|PF17921:Integrase zinc binding domain|PF17917:RNase H-like domain found in reverse transcriptase|PF00078:Reverse transcriptase (RNA-dependent DNA polymerase)
gene_QJQ45_021441	2.74469	0.00358006	YI31B_YEAST	TY3B-I	hypothetical protein && sp|Q7LHG5|YI31B_YEAST Transposon Ty3-I Gag-Pol polyprotein OS=Saccharomyces cerevisiae (strain ATCC 204508 / S288c) OX=559292 GN=TY3B-I PE=1 SV=2 && PF00385:Chromo (CHRromatin Organisation MOdifier) domain
gene_QJQ45_000947	1.14799	0.00358536	Y5010_ARATH	At5g50100	hypothetical protein && sp|Q8W485|Y5010_ARATH Uncharacterized protein At5g50100, chloroplastic OS=Arabidopsis thaliana OX=3702 GN=At5g50100 PE=1 SV=1 && PF04134:DCC1-like thiol-disulfide oxidoreductase
gene_QJQ45_001397	-1.0487	0.00367873	RCA_CHLRE	#N/A	hypothetical protein && sp|P23489|RCA_CHLRE Ribulose bisphosphate carboxylase/oxygenase activase, chloroplastic OS=Chlamydomonas reinhardtii OX=3055 PE=2 SV=1 && PF21228:Ribulose bisphosphate carboxylase/oxygenase activase, AAA, helical|PF00004:ATPase family associated with various cellular activities (AAA)
gene_QJQ45_004218	3.10424	0.00369177	POLR_DROME	pol	hypothetical protein && sp|P16423|POLR_DROME Retrovirus-related Pol polyprotein from type-2 retrotransposable element R2DM OS=Drosophila melanogaster OX=7227 GN=pol PE=4 SV=1 && PF00078:Reverse transcriptase (RNA-dependent DNA polymerase)|PF03372:Endonuclease/Exonuclease/phosphatase family
gene_QJQ45_023351	-1.5153	0.00378719	ASNS_TRIVS	#N/A	hypothetical protein && sp|O24661|ASNS_TRIVS Asparagine synthetase [glutamine-hydrolyzing] OS=Triphysaria versicolor OX=64093 GN=AS PE=2 SV=3 && PF13537:Glutamine amidotransferase domain|PF00733:Asparagine synthase
gene_QJQ45_013558	-3.21299	0.00391814	POL3_DROME	pol	hypothetical protein && sp|P04323|POL3_DROME Retrovirus-related Pol polyprotein from transposon 17.6 OS=Drosophila melanogaster OX=7227 GN=pol PE=4 SV=1 && PF17917:RNase H-like domain found in reverse transcriptase|PF17921:Integrase zinc binding domain|PF00628:PHD-finger|PF00078:Reverse transcriptase (RNA-dependent DNA polymerase)
gene_QJQ45_015382	-1.36053	0.00398955	KN5A_ORYSJ	KIN5A	hypothetical protein && sp|Q5W7C6|KN5A_ORYSJ Kinesin-like protein KIN-5A OS=Oryza sativa subsp. japonica OX=39947 GN=KIN5A PE=2 SV=1 && PF00225:Kinesin motor domain
gene_QJQ45_005734	-5.07058	0.00404035	DNAL1_CHLRE	LC1	hypothetical protein && sp|Q9XHH2|DNAL1_CHLRE Dynein axonemal light chain 1 OS=Chlamydomonas reinhardtii OX=3055 GN=LC1 PE=1 SV=1 && -
novel.4610	-2.57942	0.00411395	MSL3_MYCTU	msl3	- && sp|A0A089QRB9|MSL3_MYCTU Mycolipanoate synthase OS=Mycobacterium tuberculosis (strain ATCC 25618 / H37Rv) OX=83332 GN=msl3 PE=1 SV=2 && -
gene_QJQ45_006084	3.22884	0.00411885	H41_WHEAT	#N/A	hypothetical protein && sp|P62785|H41_WHEAT Histone H4 variant TH011 OS=Triticum aestivum OX=4565 PE=3 SV=2 && -
gene_QJQ45_007556	1.74137	0.00415332	PDE4C_RAT	Pde4c	hypothetical protein && sp|P14644|PDE4C_RAT cAMP-specific 3',5'-cyclic phosphodiesterase 4C (Fragment) OS=Rattus norvegicus OX=10116 GN=Pde4c PE=2 SV=2 && PF00233:3'5'-cyclic nucleotide phosphodiesterase
gene_QJQ45_020724	-1.74839	0.00417086	PUMP2_ARATH	#N/A	hypothetical protein && sp|Q9ZWG1|PUMP2_ARATH Mitochondrial uncoupling protein 2 OS=Arabidopsis thaliana OX=3702 GN=PUMP2 PE=2 SV=1 && PF00153:Mitochondrial carrier protein
gene_QJQ45_008763	1.12427	0.0041883	H32_BOVIN	#N/A	hypothetical protein && sp|P84227|H32_BOVIN Histone H3.2 OS=Bos taurus OX=9913 PE=1 SV=2 && PF00125:Core histone H2A/H2B/H3/H4
novel.5840	-1.26517	0.00419778	FAD12_PUNGR	#N/A	- && sp|Q84VT2|FAD12_PUNGR Delta(12)-acyl-lipid-desaturase OS=Punica granatum OX=22663 GN=FAD12 PE=2 SV=2 && PF11960:Domain of unknown function (DUF3474)
gene_QJQ45_018836	1.03707	0.00425242	LSM4_ARATH	LSM4	hypothetical protein && sp|F4K4E3|LSM4_ARATH Sm-like protein LSM4 OS=Arabidopsis thaliana OX=3702 GN=LSM4 PE=1 SV=1 && PF01423:LSM domain
gene_QJQ45_012739	3.83059	0.00426372	GUN11_ORYSJ	GLU4	hypothetical protein && sp|Q7XTH4|GUN11_ORYSJ Endoglucanase 11 OS=Oryza sativa subsp. japonica OX=39947 GN=GLU4 PE=2 SV=3 && PF00759:Glycosyl hydrolase family 9
gene_QJQ45_012155	-1.24106	0.00427905	POL5_DROME	pol	hypothetical protein && sp|Q8I7P9|POL5_DROME Retrovirus-related Pol polyprotein from transposon opus OS=Drosophila melanogaster OX=7227 GN=pol PE=4 SV=1 && PF17917:RNase H-like domain found in reverse transcriptase|PF17921:Integrase zinc binding domain|PF00078:Reverse transcriptase (RNA-dependent DNA polymerase)|PF00628:PHD-finger
gene_QJQ45_010286	-1.25793	0.00431587	EIF3K_ORYSJ	TIF3K1	hypothetical protein && sp|Q94HF1|EIF3K_ORYSJ Eukaryotic translation initiation factor 3 subunit K OS=Oryza sativa subsp. japonica OX=39947 GN=TIF3K1 PE=2 SV=1 && PF10075:CSN8/PSMD8/EIF3K family
gene_QJQ45_004009	-3.71492	0.00431606	POLX_TOBAC	#N/A	hypothetical protein && sp|P10978|POLX_TOBAC Retrovirus-related Pol polyprotein from transposon TNT 1-94 OS=Nicotiana tabacum OX=4097 PE=2 SV=1 && PF13976:GAG-pre-integrase domain|PF07727:Reverse transcriptase (RNA-dependent DNA polymerase)|PF00665:Integrase core domain
gene_QJQ45_006555	-1.67154	0.00441729	POLX_TOBAC	#N/A	hypothetical protein && sp|P10978|POLX_TOBAC Retrovirus-related Pol polyprotein from transposon TNT 1-94 OS=Nicotiana tabacum OX=4097 PE=2 SV=1 && PF07727:Reverse transcriptase (RNA-dependent DNA polymerase)|PF13976:GAG-pre-integrase domain|PF00665:Integrase core domain
gene_QJQ45_026479	-1.81053	0.00445843	MINE1_ARATH	MINE1	hypothetical protein && sp|Q9C4Z7|MINE1_ARATH Cell division topological specificity factor homolog, chloroplastic OS=Arabidopsis thaliana OX=3702 GN=MINE1 PE=1 SV=1 && PF03776:Septum formation topological specificity factor MinE
gene_QJQ45_006229	-1.21546	0.0045498	RL16_CHESB	rplP	hypothetical protein && sp|Q11HQ9|RL16_CHESB 50S ribosomal protein L16 OS=Chelativorans sp. (strain BNC1) OX=266779 GN=rplP PE=3 SV=1 && PF00252:Ribosomal protein L16p/L10e
gene_QJQ45_001168	-1.67482	0.00459198	YI31B_YEAST	TY3B-I	hypothetical protein && sp|Q7LHG5|YI31B_YEAST Transposon Ty3-I Gag-Pol polyprotein OS=Saccharomyces cerevisiae (strain ATCC 204508 / S288c) OX=559292 GN=TY3B-I PE=1 SV=2 && PF00078:Reverse transcriptase (RNA-dependent DNA polymerase)|PF00385:Chromo (CHRromatin Organisation MOdifier) domain|PF17919:RNase H-like domain found in reverse transcriptase|PF17921:Integrase zinc binding domain
gene_QJQ45_023040	3.57219	0.00461441	GUNA_BACPU	eglA	hypothetical protein && sp|Q5YLG1|GUNA_BACPU Endoglucanase A OS=Bacillus pumilus OX=1408 GN=eglA PE=1 SV=1 && PF00759:Glycosyl hydrolase family 9
gene_QJQ45_022121	1.64639	0.00463287	VMP1_DICDI	vmp1	hypothetical protein && sp|Q54NL4|VMP1_DICDI Vacuole membrane protein 1 homolog OS=Dictyostelium discoideum OX=44689 GN=vmp1 PE=3 SV=1 && -
gene_QJQ45_017738	2.14663	0.0046793	CGS6_YEAST	CLB6	hypothetical protein && sp|P32943|CGS6_YEAST S-phase entry cyclin-6 OS=Saccharomyces cerevisiae (strain ATCC 204508 / S288c) OX=559292 GN=CLB6 PE=1 SV=2 && PF00134:Cyclin, N-terminal domain
novel.4609	-2.31978	0.00484212	PPSC_MYCBO	ppsC	- && sp|Q7TXL8|PPSC_MYCBO Phenolphthiocerol/phthiocerol polyketide synthase subunit C OS=Mycobacterium bovis (strain ATCC BAA-935 / AF2122/97) OX=233413 GN=ppsC PE=1 SV=1 && -
gene_QJQ45_006515	-1.02453	0.00487037	Y4121_ARATH	At4g12130	hypothetical protein && sp|Q8L733|Y4121_ARATH Putative transferase At4g12130, mitochondrial OS=Arabidopsis thaliana OX=3702 GN=At4g12130 PE=1 SV=1 && -
novel.4019	-1.03464	0.0049688	CP3AT_PIG	CYP3A29	- && sp|P79401|CP3AT_PIG Cytochrome P450 3A29 OS=Sus scrofa OX=9823 GN=CYP3A29 PE=2 SV=1 && PF00067:Cytochrome P450
novel.1547	1.0214	0.00507361	LMLN_DROPS	GA17800	- && sp|Q29AK2|LMLN_DROPS Leishmanolysin-like peptidase OS=Drosophila pseudoobscura pseudoobscura OX=46245 GN=GA17800 PE=3 SV=1 && PF01457:Leishmanolysin
novel.5854	-2.03037	0.0051374	GLE_CHLRE	#N/A	- && sp|P31178|GLE_CHLRE Autolysin OS=Chlamydomonas reinhardtii OX=3055 PE=1 SV=1 && -
gene_QJQ45_026893	2.03878	0.00523421	POL3_DROME	pol	hypothetical protein && sp|P04323|POL3_DROME Retrovirus-related Pol polyprotein from transposon 17.6 OS=Drosophila melanogaster OX=7227 GN=pol PE=4 SV=1 && PF17917:RNase H-like domain found in reverse transcriptase|PF00078:Reverse transcriptase (RNA-dependent DNA polymerase)|PF00385:Chromo (CHRromatin Organisation MOdifier) domain|PF17921:Integrase zinc binding domain
novel.1508	-2.49032	0.00537915	MAN2_ORYSJ	#N/A	- && sp|Q0JJD4|MAN2_ORYSJ Mannan endo-1,4-beta-mannosidase 2 OS=Oryza sativa subsp. japonica OX=39947 GN=MAN2 PE=2 SV=2 && PF00150:Cellulase (glycosyl hydrolase family 5)
gene_QJQ45_007810	-2.36173	0.00538753	POL3_DROME	pol	hypothetical protein && sp|P04323|POL3_DROME Retrovirus-related Pol polyprotein from transposon 17.6 OS=Drosophila melanogaster OX=7227 GN=pol PE=4 SV=1 && PF17921:Integrase zinc binding domain|PF00078:Reverse transcriptase (RNA-dependent DNA polymerase)|PF17917:RNase H-like domain found in reverse transcriptase
novel.2491	-1.09414	0.00547178	GATA1_ARATH	GATA1	- && sp|Q8LAU9|GATA1_ARATH GATA transcription factor 1 OS=Arabidopsis thaliana OX=3702 GN=GATA1 PE=2 SV=2 && PF00320:GATA zinc finger
gene_QJQ45_020371	3.74037	0.00560609	SDN5_ARATH	SDN5	hypothetical protein && sp|Q8L7M4|SDN5_ARATH Small RNA degrading nuclease 5 OS=Arabidopsis thaliana OX=3702 GN=SDN5 PE=2 SV=2 && -
novel.1873	1.47254	0.00561189	HGD_ORYSJ	HGO	- && sp|Q5VRH4|HGD_ORYSJ Homogentisate 1,2-dioxygenase OS=Oryza sativa subsp. japonica OX=39947 GN=HGO PE=2 SV=1 && -
gene_QJQ45_022965	1.32454	0.00581453	YI31B_YEAST	TY3B-I	hypothetical protein && sp|Q7LHG5|YI31B_YEAST Transposon Ty3-I Gag-Pol polyprotein OS=Saccharomyces cerevisiae (strain ATCC 204508 / S288c) OX=559292 GN=TY3B-I PE=1 SV=2 && PF00665:Integrase core domain|PF00078:Reverse transcriptase (RNA-dependent DNA polymerase)|PF17917:RNase H-like domain found in reverse transcriptase|PF00385:Chromo (CHRromatin Organisation MOdifier) domain|PF17921:Integrase z…
gene_QJQ45_005300	1.22877	0.00581703	CDKL5_HUMAN	CDKL5	hypothetical protein && sp|O76039|CDKL5_HUMAN Cyclin-dependent kinase-like 5 OS=Homo sapiens OX=9606 GN=CDKL5 PE=1 SV=2 && PF00069:Protein kinase domain
gene_QJQ45_006595	1.71732	0.0058427	POL3_DROME	pol	hypothetical protein && sp|P04323|POL3_DROME Retrovirus-related Pol polyprotein from transposon 17.6 OS=Drosophila melanogaster OX=7227 GN=pol PE=4 SV=1 && PF17921:Integrase zinc binding domain|PF00078:Reverse transcriptase (RNA-dependent DNA polymerase)|PF17917:RNase H-like domain found in reverse transcriptase|PF00385:Chromo (CHRromatin Organisation MOdifier) domain
gene_QJQ45_027652	4.76979	0.0060587	M3K21_HUMAN	MAP3K21	hypothetical protein && sp|Q5TCX8|M3K21_HUMAN Mitogen-activated protein kinase kinase kinase 21 OS=Homo sapiens OX=9606 GN=MAP3K21 PE=1 SV=3 && PF07714:Protein tyrosine and serine/threonine kinase
gene_QJQ45_009072	-2.68067	0.0060763	HS16A_WHEAT	hsp16.9A	hypothetical protein && sp|P12810|HS16A_WHEAT 16.9 kDa class I heat shock protein 1 OS=Triticum aestivum OX=4565 GN=hsp16.9A PE=2 SV=1 && PF00011:Hsp20/alpha crystallin family
gene_QJQ45_029583	1.72627	0.00611507	YHIN_ECOLI	#N/A	hypothetical protein && sp|P37631|YHIN_ECOLI Uncharacterized protein YhiN OS=Escherichia coli (strain K12) OX=83333 GN=yhiN PE=4 SV=3 && PF03486:HI0933-like protein
gene_QJQ45_013070	1.14398	0.006123	STY8_ARATH	STY8	hypothetical protein && sp|O22558|STY8_ARATH Serine/threonine-protein kinase STY8 OS=Arabidopsis thaliana OX=3702 GN=STY8 PE=1 SV=2 && PF07714:Protein tyrosine and serine/threonine kinase
novel.3723	1.81212	0.00620392	SFAS_DUNBI	#N/A	- && sp|P54214|SFAS_DUNBI SF-assemblin OS=Dunaliella bioculata OX=13790 PE=1 SV=1 && PF06705:SF-assemblin/beta giardin
gene_QJQ45_019411	-2.03545	0.00622045	POL3_DROME	pol	hypothetical protein && sp|P04323|POL3_DROME Retrovirus-related Pol polyprotein from transposon 17.6 OS=Drosophila melanogaster OX=7227 GN=pol PE=4 SV=1 && PF00078:Reverse transcriptase (RNA-dependent DNA polymerase)|PF00628:PHD-finger|PF17921:Integrase zinc binding domain|PF17917:RNase H-like domain found in reverse transcriptase
gene_QJQ45_013604	1.16249	0.00650867	H41_WHEAT	#N/A	hypothetical protein && sp|P62785|H41_WHEAT Histone H4 variant TH011 OS=Triticum aestivum OX=4565 PE=3 SV=2 && PF00078:Reverse transcriptase (RNA-dependent DNA polymerase)
gene_QJQ45_010318	1.47887	0.00664606	NIFU5_ARATH	NIFU5	hypothetical protein && sp|Q9C8J2|NIFU5_ARATH NifU-like protein 5, mitochondrial OS=Arabidopsis thaliana OX=3702 GN=NIFU5 PE=2 SV=1 && PF01106:NifU-like domain|PF00665:Integrase core domain|PF17921:Integrase zinc binding domain
gene_QJQ45_017365	2.87649	0.00678279	YG31B_YEAST	TY3B-G	hypothetical protein && sp|Q99315|YG31B_YEAST Transposon Ty3-G Gag-Pol polyprotein OS=Saccharomyces cerevisiae (strain ATCC 204508 / S288c) OX=559292 GN=TY3B-G PE=1 SV=3 && PF00628:PHD-finger|PF03732:Retrotransposon gag protein|PF17919:RNase H-like domain found in reverse transcriptase|PF00078:Reverse transcriptase (RNA-dependent DNA polymerase)|PF17921:Integrase zinc binding domain
gene_QJQ45_006371	4.65564	0.00683855	YI31B_YEAST	TY3B-I	hypothetical protein && sp|Q7LHG5|YI31B_YEAST Transposon Ty3-I Gag-Pol polyprotein OS=Saccharomyces cerevisiae (strain ATCC 204508 / S288c) OX=559292 GN=TY3B-I PE=1 SV=2 && PF17919:RNase H-like domain found in reverse transcriptase|PF19259:Ty3 transposon capsid-like protein|PF00078:Reverse transcriptase (RNA-dependent DNA polymerase)|PF17921:Integrase zinc binding domain
gene_QJQ45_026374	-1.18461	0.00687369	GLYOX_PSEPK	thiO	hypothetical protein && sp|Q88Q83|GLYOX_PSEPK Glycine oxidase OS=Pseudomonas putida (strain ATCC 47054 / DSM 6125 / NCIMB 11950 / KT2440) OX=160488 GN=thiO PE=1 SV=1 && PF01266:FAD dependent oxidoreductase
gene_QJQ45_015534	1.88747	0.00687489	AP4S_ARATH	At2g19790	hypothetical protein && sp|O82201|AP4S_ARATH AP-4 complex subunit sigma OS=Arabidopsis thaliana OX=3702 GN=At2g19790 PE=1 SV=1 && PF01217:Clathrin adaptor complex small chain
gene_QJQ45_010584	-1.05208	0.00689204	PO21_NASVI	#N/A	hypothetical protein && sp|Q03278|PO21_NASVI Retrovirus-related Pol polyprotein from type-1 retrotransposable element R2 (Fragment) OS=Nasonia vitripennis OX=7425 PE=4 SV=2 && PF00078:Reverse transcriptase (RNA-dependent DNA polymerase)
gene_QJQ45_017748	-1.17856	0.00693049	PLPL3_MOUSE	Pnpla3	hypothetical protein && sp|Q91WW7|PLPL3_MOUSE 1-acylglycerol-3-phosphate O-acyltransferase Pnpla3 OS=Mus musculus OX=10090 GN=Pnpla3 PE=1 SV=1 && -
gene_QJQ45_023547	1.14172	0.00693501	FANCM_HUMAN	FANCM	hypothetical protein && sp|Q8IYD8|FANCM_HUMAN Fanconi anemia group M protein OS=Homo sapiens OX=9606 GN=FANCM PE=1 SV=2 && PF00271:Helicase conserved C-terminal domain
gene_QJQ45_001320	1.51653	0.00705259	PLD_STRCW	pld	hypothetical protein && sp|Q8KRU5|PLD_STRCW Phospholipase D OS=Streptomyces chromofuscus OX=42881 GN=pld PE=1 SV=2 && PF09423:PhoD-like phosphatase
gene_QJQ45_001478	-1.07197	0.00707658	FH19_ARATH	FH19	hypothetical protein && sp|Q9FF14|FH19_ARATH Formin-like protein 19 OS=Arabidopsis thaliana OX=3702 GN=FH19 PE=2 SV=1 && PF02181:Formin Homology 2 Domain
gene_QJQ45_019250	5.18571	0.00726333	TF212_SCHPO	Tf2-12	hypothetical protein && sp|P0CT41|TF212_SCHPO Transposon Tf2-12 polyprotein OS=Schizosaccharomyces pombe (strain 972 / ATCC 24843) OX=284812 GN=Tf2-12 PE=3 SV=1 && PF00385:Chromo (CHRromatin Organisation MOdifier) domain|PF17921:Integrase zinc binding domain|PF00078:Reverse transcriptase (RNA-dependent DNA polymerase)|PF17917:RNase H-like domain found in reverse transcriptase|PF00628:PHD-finger|P…
gene_QJQ45_005639	1.16731	0.00738688	POLR_DROME	pol	hypothetical protein && sp|P16423|POLR_DROME Retrovirus-related Pol polyprotein from type-2 retrotransposable element R2DM OS=Drosophila melanogaster OX=7227 GN=pol PE=4 SV=1 && PF03372:Endonuclease/Exonuclease/phosphatase family|PF00075:RNase H|PF00078:Reverse transcriptase (RNA-dependent DNA polymerase)
gene_QJQ45_014141	1.67724	0.0075022	ISCA2_DICDI	isca2	hypothetical protein && sp|Q54P40|ISCA2_DICDI Iron-sulfur cluster assembly 2 homolog, mitochondrial OS=Dictyostelium discoideum OX=44689 GN=isca2 PE=3 SV=1 && -
gene_QJQ45_016944	1.89987	0.00766004	YI31B_YEAST	TY3B-I	hypothetical protein && sp|Q7LHG5|YI31B_YEAST Transposon Ty3-I Gag-Pol polyprotein OS=Saccharomyces cerevisiae (strain ATCC 204508 / S288c) OX=559292 GN=TY3B-I PE=1 SV=2 && PF00078:Reverse transcriptase (RNA-dependent DNA polymerase)|PF17917:RNase H-like domain found in reverse transcriptase
gene_QJQ45_008917	2.01833	0.00775416	H41_WHEAT	#N/A	hypothetical protein && sp|P62785|H41_WHEAT Histone H4 variant TH011 OS=Triticum aestivum OX=4565 PE=3 SV=2 && -
gene_QJQ45_027314	1.72583	0.00783305	RSSA_CHLRE	CHLREDRAFT_126059	hypothetical protein && sp|A8IB25|RSSA_CHLRE 40S ribosomal protein SA OS=Chlamydomonas reinhardtii OX=3055 GN=CHLREDRAFT_126059 PE=3 SV=1 && PF00318:Ribosomal protein S2
gene_QJQ45_007119	1.30843	0.00788381	UBIQ1_CAEEL	ubq-1	hypothetical protein && sp|P0CG71|UBIQ1_CAEEL Polyubiquitin-A OS=Caenorhabditis elegans OX=6239 GN=ubq-1 PE=3 SV=1 && PF00240:Ubiquitin family
novel.4311	1.93244	0.00813806	YJU2_DICDI	yju2	- && sp|Q54WR5|YJU2_DICDI Splicing factor YJU2 OS=Dictyostelium discoideum OX=44689 GN=yju2 PE=3 SV=1 && PF04502:Saf4/Yju2 protein
gene_QJQ45_030336	1.84369	0.00841832	POL3_DROME	pol	hypothetical protein && sp|P04323|POL3_DROME Retrovirus-related Pol polyprotein from transposon 17.6 OS=Drosophila melanogaster OX=7227 GN=pol PE=4 SV=1 && PF17917:RNase H-like domain found in reverse transcriptase|PF00385:Chromo (CHRromatin Organisation MOdifier) domain|PF00078:Reverse transcriptase (RNA-dependent DNA polymerase)|PF17921:Integrase zinc binding domain
novel.3022	1.42028	0.00844917	CBPE_HUMAN	CPE	- && sp|P16870|CBPE_HUMAN Carboxypeptidase E OS=Homo sapiens OX=9606 GN=CPE PE=1 SV=1 && -
gene_QJQ45_006985	-3.91658	0.00856866	H32_BOVIN	#N/A	hypothetical protein && sp|P84227|H32_BOVIN Histone H3.2 OS=Bos taurus OX=9913 PE=1 SV=2 && PF00125:Core histone H2A/H2B/H3/H4
novel.6433	-1.13812	0.00893268	CNOT1_HUMAN	CNOT1	- && sp|A5YKK6|CNOT1_HUMAN CCR4-NOT transcription complex subunit 1 OS=Homo sapiens OX=9606 GN=CNOT1 PE=1 SV=2 && -
gene_QJQ45_016491	1.60833	0.00899973	STK36_MOUSE	Stk36	hypothetical protein && sp|Q69ZM6|STK36_MOUSE Serine/threonine-protein kinase 36 OS=Mus musculus OX=10090 GN=Stk36 PE=1 SV=3 && PF00069:Protein kinase domain
gene_QJQ45_012295	2.00833	0.00900262	POL2_DROME	pol	hypothetical protein && sp|P20825|POL2_DROME Retrovirus-related Pol polyprotein from transposon 297 OS=Drosophila melanogaster OX=7227 GN=pol PE=4 SV=1 && PF00078:Reverse transcriptase (RNA-dependent DNA polymerase)|PF17917:RNase H-like domain found in reverse transcriptase|PF00385:Chromo (CHRromatin Organisation MOdifier) domain|PF17921:Integrase zinc binding domain
gene_QJQ45_002695	1.03034	0.00914015	POLR_DROME	pol	hypothetical protein && sp|P16423|POLR_DROME Retrovirus-related Pol polyprotein from type-2 retrotransposable element R2DM OS=Drosophila melanogaster OX=7227 GN=pol PE=4 SV=1 && PF00075:RNase H|PF02099:Josephin|PF00078:Reverse transcriptase (RNA-dependent DNA polymerase)
gene_QJQ45_009351	6.39759	0.00920706	UBC32_ARATH	UBC32	hypothetical protein && sp|Q9LSP7|UBC32_ARATH Ubiquitin-conjugating enzyme E2 32 OS=Arabidopsis thaliana OX=3702 GN=UBC32 PE=2 SV=1 && -
gene_QJQ45_003529	2.01798	0.00940719	POL3_DROME	pol	hypothetical protein && sp|P04323|POL3_DROME Retrovirus-related Pol polyprotein from transposon 17.6 OS=Drosophila melanogaster OX=7227 GN=pol PE=4 SV=1 && PF17917:RNase H-like domain found in reverse transcriptase|PF17921:Integrase zinc binding domain|PF00628:PHD-finger
gene_QJQ45_030120	1.18528	0.00942498	PH1_ARATH	PH1	hypothetical protein && sp|Q9ST43|PH1_ARATH Pleckstrin homology domain-containing protein 1 OS=Arabidopsis thaliana OX=3702 GN=PH1 PE=2 SV=2 && PF00169:PH domain
gene_QJQ45_003833	4.5319	0.00947289	POLR1_ARATH	RE1	hypothetical protein && sp|Q94HW2|POLR1_ARATH Retrovirus-related Pol polyprotein from transposon RE1 OS=Arabidopsis thaliana OX=3702 GN=RE1 PE=2 SV=1 && PF07727:Reverse transcriptase (RNA-dependent DNA polymerase)
gene_QJQ45_008731	1.34459	0.00982678	PO21_NASVI	#N/A	hypothetical protein && sp|Q03278|PO21_NASVI Retrovirus-related Pol polyprotein from type-1 retrotransposable element R2 (Fragment) OS=Nasonia vitripennis OX=7425 PE=4 SV=2 && PF00078:Reverse transcriptase (RNA-dependent DNA polymerase)
gene_QJQ45_021910	1.25693	0.00988241	YI31B_YEAST	TY3B-I	hypothetical protein && sp|Q7LHG5|YI31B_YEAST Transposon Ty3-I Gag-Pol polyprotein OS=Saccharomyces cerevisiae (strain ATCC 204508 / S288c) OX=559292 GN=TY3B-I PE=1 SV=2 && PF17921:Integrase zinc binding domain|PF00665:Integrase core domain|PF00385:Chromo (CHRromatin Organisation MOdifier) domain|PF00078:Reverse transcriptase (RNA-dependent DNA polymerase)|PF17917:RNase H-like domain found in rev…
gene_QJQ45_014004	1.08108	0.0100207	CP4V2_MOUSE	Cyp4v2	hypothetical protein && sp|Q9DBW0|CP4V2_MOUSE Cytochrome P450 4V2 OS=Mus musculus OX=10090 GN=Cyp4v2 PE=1 SV=1 && PF00067:Cytochrome P450
gene_QJQ45_013802	1.15105	0.0100716	LMLN_DROPS	GA17800	hypothetical protein && sp|Q29AK2|LMLN_DROPS Leishmanolysin-like peptidase OS=Drosophila pseudoobscura pseudoobscura OX=46245 GN=GA17800 PE=3 SV=1 && PF01457:Leishmanolysin
gene_QJQ45_010577	2.51859	0.0101152	TF212_SCHPO	Tf2-12	hypothetical protein && sp|P0CT41|TF212_SCHPO Transposon Tf2-12 polyprotein OS=Schizosaccharomyces pombe (strain 972 / ATCC 24843) OX=284812 GN=Tf2-12 PE=3 SV=1 && PF17917:RNase H-like domain found in reverse transcriptase|PF17921:Integrase zinc binding domain|PF00078:Reverse transcriptase (RNA-dependent DNA polymerase)|PF00385:Chromo (CHRromatin Organisation MOdifier) domain
gene_QJQ45_007782	-1.21603	0.0102316	POLX_TOBAC	#N/A	hypothetical protein && sp|P10978|POLX_TOBAC Retrovirus-related Pol polyprotein from transposon TNT 1-94 OS=Nicotiana tabacum OX=4097 PE=2 SV=1 && PF00665:Integrase core domain|PF14223:gag-polypeptide of LTR copia-type|PF07727:Reverse transcriptase (RNA-dependent DNA polymerase)|PF13976:GAG-pre-integrase domain
gene_QJQ45_027299	1.55626	0.010278	TBCB_ARATH	TFCB	hypothetical protein && sp|Q67Z52|TBCB_ARATH Tubulin-folding cofactor B OS=Arabidopsis thaliana OX=3702 GN=TFCB PE=1 SV=1 && PF14560:Ubiquitin-like domain|PF01302:CAP-Gly domain
gene_QJQ45_011748	2.29275	0.0104207	POL3_DROME	pol	hypothetical protein && sp|P04323|POL3_DROME Retrovirus-related Pol polyprotein from transposon 17.6 OS=Drosophila melanogaster OX=7227 GN=pol PE=4 SV=1 && PF00078:Reverse transcriptase (RNA-dependent DNA polymerase)
gene_QJQ45_008903	1.37264	0.0106765	YI31B_YEAST	TY3B-I	hypothetical protein && sp|Q7LHG5|YI31B_YEAST Transposon Ty3-I Gag-Pol polyprotein OS=Saccharomyces cerevisiae (strain ATCC 204508 / S288c) OX=559292 GN=TY3B-I PE=1 SV=2 && PF00665:Integrase core domain|PF17917:RNase H-like domain found in reverse transcriptase|PF00078:Reverse transcriptase (RNA-dependent DNA polymerase)|PF00385:Chromo (CHRromatin Organisation MOdifier) domain|PF17921:Integrase z…
gene_QJQ45_000837	-1.56491	0.0107897	PDE8A_HUMAN	PDE8A	hypothetical protein && sp|O60658|PDE8A_HUMAN High affinity cAMP-specific and IBMX-insensitive 3',5'-cyclic phosphodiesterase 8A OS=Homo sapiens OX=9606 GN=PDE8A PE=1 SV=2 && PF00233:3'5'-cyclic nucleotide phosphodiesterase
gene_QJQ45_029271	1.08817	0.0111692	VGFR2_MOUSE	Kdr	hypothetical protein && sp|P35918|VGFR2_MOUSE Vascular endothelial growth factor receptor 2 OS=Mus musculus OX=10090 GN=Kdr PE=1 SV=2 && PF00069:Protein kinase domain|PF07714:Protein tyrosine and serine/threonine kinase
gene_QJQ45_019293	3.54039	0.0112015	POLX_TOBAC	#N/A	hypothetical protein && sp|P10978|POLX_TOBAC Retrovirus-related Pol polyprotein from transposon TNT 1-94 OS=Nicotiana tabacum OX=4097 PE=2 SV=1 && PF14223:gag-polypeptide of LTR copia-type|PF07727:Reverse transcriptase (RNA-dependent DNA polymerase)
gene_QJQ45_030412	5.07237	0.0112684	MKS3_HUMAN	TMEM67	hypothetical protein && sp|Q5HYA8|MKS3_HUMAN Meckelin OS=Homo sapiens OX=9606 GN=TMEM67 PE=1 SV=2 && PF09773:Meckelin (Transmembrane protein 67)
gene_QJQ45_027995	4.47839	0.0113174	RHL1_ARATH	RHL1	hypothetical protein && sp|O81242|RHL1_ARATH DNA-binding protein RHL1 OS=Arabidopsis thaliana OX=3702 GN=RHL1 PE=1 SV=1 && -
gene_QJQ45_026973	2.81584	0.0114406	Y3148_ARATH	LRR-RLK	hypothetical protein && sp|C0LGN2|Y3148_ARATH Probable leucine-rich repeat receptor-like serine/threonine-protein kinase At3g14840 OS=Arabidopsis thaliana OX=3702 GN=LRR-RLK PE=1 SV=1 && PF00069:Protein kinase domain
gene_QJQ45_020515	-1.35506	0.0115065	PO21_NASVI	#N/A	hypothetical protein && sp|Q03278|PO21_NASVI Retrovirus-related Pol polyprotein from type-1 retrotransposable element R2 (Fragment) OS=Nasonia vitripennis OX=7425 PE=4 SV=2 && PF00078:Reverse transcriptase (RNA-dependent DNA polymerase)|PF06549:Protein of unknown function (DUF1118)
gene_QJQ45_007980	-3.05782	0.0117977	H2A_CHLRE	H2A-II	hypothetical protein && sp|P50567|H2A_CHLRE Histone H2A OS=Chlamydomonas reinhardtii OX=3055 GN=H2A-II PE=3 SV=1 && PF00125:Core histone H2A/H2B/H3/H4|PF16211:C-terminus of histone H2A
gene_QJQ45_022488	-1.16885	0.0118249	XG113_ARATH	XEG113	hypothetical protein && sp|Q8VXZ5|XG113_ARATH Arabinosyltransferase XEG113 OS=Arabidopsis thaliana OX=3702 GN=XEG113 PE=2 SV=1 && PF03407:Nucleotide-diphospho-sugar transferase
gene_QJQ45_030215	4.44776	0.0119313	RH7_ORYSJ	Os09g0520700	hypothetical protein && sp|Q650T9|RH7_ORYSJ DEAD-box ATP-dependent RNA helicase 7 OS=Oryza sativa subsp. japonica OX=39947 GN=Os09g0520700 PE=2 SV=1 && PF08152:GUCT (NUC152) domain
gene_QJQ45_012253	1.80521	0.0119609	KKCC2_HUMAN	CAMKK2	hypothetical protein && sp|Q96RR4|KKCC2_HUMAN Calcium/calmodulin-dependent protein kinase kinase 2 OS=Homo sapiens OX=9606 GN=CAMKK2 PE=1 SV=2 && PF00069:Protein kinase domain
novel.194	1.34205	0.012293	YAK1_ARATH	YAK1	- && sp|Q8RWH3|YAK1_ARATH Dual specificity protein kinase YAK1 homolog OS=Arabidopsis thaliana OX=3702 GN=YAK1 PE=1 SV=1 && -
novel.475	-1.86072	0.0123027	PCNA_BRANA	#N/A	- && sp|Q43124|PCNA_BRANA Proliferating cell nuclear antigen OS=Brassica napus OX=3708 PE=2 SV=1 && PF00705:Proliferating cell nuclear antigen, N-terminal domain|PF02747:Proliferating cell nuclear antigen, C-terminal domain
gene_QJQ45_007395	1.392	0.0124456	1433_CHLRE	#N/A	hypothetical protein && sp|P52908|1433_CHLRE 14-3-3-like protein OS=Chlamydomonas reinhardtii OX=3055 PE=2 SV=1 && PF00244:14-3-3 protein
gene_QJQ45_017287	-1.16197	0.0125154	NR_NARAP	#N/A	hypothetical protein && sp|A0A1C9II22|NR_NARAP Noroxomaritidine/norcraugsodine reductase OS=Narcissus aff. pseudonarcissus MK-2014 OX=1540222 GN=NR PE=1 SV=1 && PF00106:short chain dehydrogenase
gene_QJQ45_016510	4.99829	0.0125543	YI31B_YEAST	TY3B-I	hypothetical protein && sp|Q7LHG5|YI31B_YEAST Transposon Ty3-I Gag-Pol polyprotein OS=Saccharomyces cerevisiae (strain ATCC 204508 / S288c) OX=559292 GN=TY3B-I PE=1 SV=2 && PF17917:RNase H-like domain found in reverse transcriptase|PF17921:Integrase zinc binding domain|PF00078:Reverse transcriptase (RNA-dependent DNA polymerase)|PF00385:Chromo (CHRromatin Organisation MOdifier) domain
gene_QJQ45_000832	-1.87318	0.0131903	TBC31_BOVIN	TBC1D31	hypothetical protein && sp|Q29RL0|TBC31_BOVIN TBC1 domain family member 31 OS=Bos taurus OX=9913 GN=TBC1D31 PE=2 SV=1 && -
