# Supplementary material for: Physiological and transcriptomic analyses reveal the effects of phytohormones on growth and astaxanthin accumulation in Haematococcus pluvialis
Source: Research Square preprint supplement (doi:10.21203/rs.3.rs-8198834/v1), 2025-12-15
Supplement: Supplementary file 2 [file b3564c0a8d6590a8e296d4f3.docx]

**Figure S1.** Distribution of gene expression levels in the transcriptome libraries of *H. pluvialis*. Stacked columns represent the proportions of expressed genes within four FPKM intervals (0–0.5, 0.5–5, 5–100, and ≥100) for the GCon, IAA, RCon, and MeJA samples, respectively.


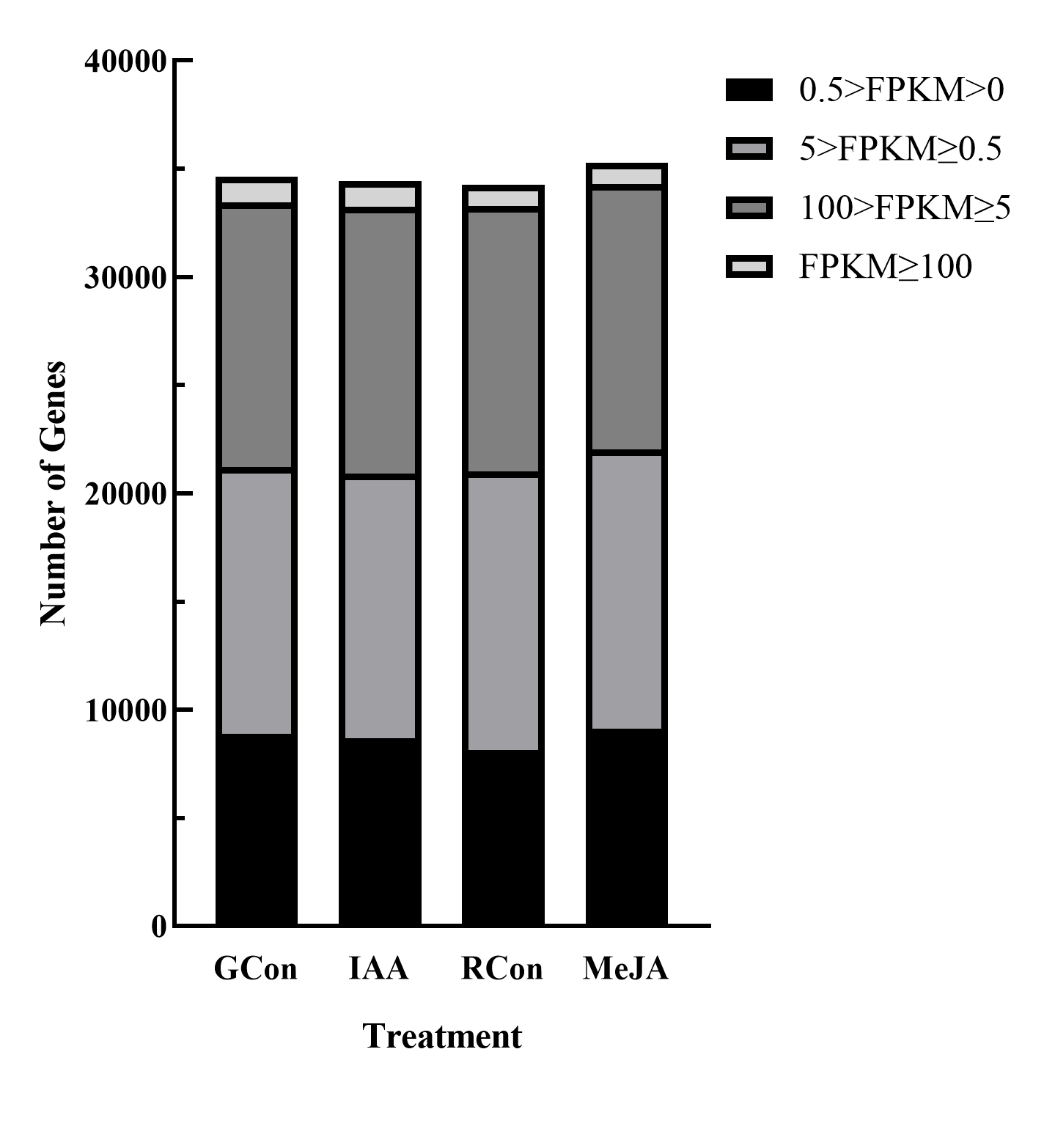


**Table S1** Sequences of primers used for quantitative reverse transcription polymerase chain reaction (qRT-PCR)

| **Gene** | **Sequence (5’–3’)** | **Product size (bp)** | **Tm (°C)** |
| --- | --- | --- | --- |
| *gene_QJQ45_011020* | F:5’- GGCGGACCTTTTGTTACTGC -3’  R:5’- AAGTGATGGCCAGCGTGTTA -3’ | 112 | 60 |
| *gene_QJQ45_006121* | F:5’- CTATGCGAACTGGGAGCCAT -3’  R:5’- TGTGGGTCGAATGAGCATGT -3’ | 100 | 59 |
| *gene_QJQ45_022981* | F:5’- TCAAGTGGCTGACTTGTCCC -3’  R:5’- ACCGTGCAAGTCAATTAGGGT -3’ | 122 | 60 |
| *gene_QJQ45_024701* | F:5’- ACAGGCAAGTTGGCAGTAGT -3’  R:5’- GGGCAGCTATTCTCAGGTCC -3’ | 125 | 59 |
| *gene_QJQ45_000748* | F:5’- GTCCCTACTACCGGGAGCC -3’  R:5’- CAAAGCTGGGTCTGACTCGTA -3’ | 140 | 60 |
| *gene_QJQ45_021793* | F:5’- TGCTGAACTACCGCACCATT -3’  R:5’- CGCAGTGGTCAGGTTCATCT -3’ | 125 | 60 |
| *gene_QJQ45_001860* | F:5’- ACCCTGAGCATGGGTACAAG -3’  R:5’- ACTATGTGCACGGGTGTGAC -3’ | 112 | 60 |
| *gene_QJQ45_024642* | F:5’- GGGTACATCCTCAGAAGCAGC -3’  R:5’- TCACCATACTTCTCAGCCAACC -3’ | 115 | 60 |
| *gene_QJQ45_027541* | F:5’- CAATAAATACGCCGCATCGGAC -3’  R:5’- GTGTCAGCGGTTTGCTCAGG -3’ | 144 | 61 |
| *gene_QJQ45_001374* | F:5’-CTCAAATGTACTGAACAGCAGGC -3’  R:5’- TATGACAGCTGCTCCCGTTTG -3’ | 125 | 60 |
| *gene_QJQ45_004101* | F:5’- TGTGTCCGGCCATAGGATTG -3’  R:5’- GTCCACCAGGGTGACATACG -3’ | 139 | 60 |
| *gene_QJQ45_007238* | F:5’- CGGACTTCAAGGGCAAATACG -3’  R:5’- GCCTTGAACTCGTCAATTCGG -3’ | 109 | 59 |
| *gene_QJQ45_016574* | F:5’- CCTAGGCCACACTCAGTCACAT -3’  R:5’- CTGAGGTCTGTGCCAACTGATG -3’ | 141 | 61 |
| *gene_QJQ45_003696* | F:5’- CCTCACAGGACAAGACGGTG -3’  R:5’- CTCTCTGTAGCCACGCCAAA -3’ | 130 | 60 |
